# Supplementary material for: A window into intracellular events in myositis through subcellular proteomics
Source: PubMed Central journal article supplement (PMC11785624; doi:10.1007/s00011-025-01996-8), 2025-01-31
Supplement: 11_2025_1996_MOESM1_ESM.pdf [file 11_2025_1996_MOESM1_ESM.pdf]

## Supplementary Tables

Title : A window into intracellular events in myositis through subcellular proteomics

Journal : Inflammation Research

Jennifer M. Peterson<sup>1\*</sup>, Valérie Leclair<sup>2</sup>, Olumide E. Oyebode<sup>1</sup>, Dema M. Herzallah<sup>1</sup>, Andrea L. Nestor-Kalinoski<sup>3</sup> Jose Morais<sup>4</sup>, René P. Zahedi<sup>5,6,7</sup>, Mazen Alamr<sup>8</sup>, John A. DiBattista<sup>9</sup>, Marie Hudson<sup>2\*</sup>

<sup>\*1</sup>Department of Exercise & Rehabilitative Sciences, The University of Toledo, Toledo OH, USA, <sup>2</sup>Division of Rheumatology and Department of Medicine, McGill University, Montreal, QC, Canada, <sup>3</sup>Advanced Microscopy & Imaging Center, Department of Surgery, University of Toledo, Toledo, OH, <sup>4</sup>Division of Geriatric Medicine and Research Institute, McGill University Health Centre, Quebec, Montreal, QC, Canada, <sup>5</sup>Segal Cancer Proteomics Centre, Lady Davis Institute for Medical Research, Montreal, QC, Canada, <sup>6</sup>Manitoba Centre for Proteomics and Systems Biology, University of Manitoba, Winnipeg, MB, Canada, <sup>7</sup>Department of Internal Medicine and Department of Biochemistry and Medical Genetics, University of Manitoba, Winnipeg, MB, Canada, <sup>8</sup>Department of Neurology and Neurosurgery, McGill University, Montreal, QC, Canada, <sup>9</sup>Department of Medicine and Experimental Medicine, McGill University Health Centre Research Institute, Montreal, QC, Canada.

Corresponding authors\*.

Address Correspondence To: Jennifer M. Peterson, The University of Toledo, 2801 W. Bancroft St., MS 119, Toledo OH, 43606, phone: 419-530-6679, email: [jennifer.peterson@utoledo.edu](mailto:jennifer.peterson@utoledo.edu)

**Supplemental Table 1 Page 1. All proteins quantitated in study**

| Protein Name                                                   | Uniprot | Gene   | Subcellular localization                                                                                                                                                                                                                                                                                                                                                                                                                             |
|----------------------------------------------------------------|---------|--------|------------------------------------------------------------------------------------------------------------------------------------------------------------------------------------------------------------------------------------------------------------------------------------------------------------------------------------------------------------------------------------------------------------------------------------------------------|
| T-complex protein 1 subunit beta                               | P78371  | CCT2   | Cytoplasm {ECO:0000269 PubMed:20080638}.                                                                                                                                                                                                                                                                                                                                                                                                             |
| Importin subunit beta-1                                        | Q14974  | KPNB1  | Cytoplasm {ECO:0000269 PubMed:11891849}. Nucleus envelope {ECO:0000269 PubMed:11891849}.                                                                                                                                                                                                                                                                                                                                                             |
| Phosphoglucomutase-1                                           | P36871  | PGM1   | Isoform 1: Cytoplasm.                                                                                                                                                                                                                                                                                                                                                                                                                                |
| Cytochrome c oxidase subunit 7C, mitochondrial                 | P15954  | COX7C  | Mitochondrion inner membrane {ECO:0000250}.                                                                                                                                                                                                                                                                                                                                                                                                          |
| Heat shock cognate 71 kDa protein                              | P11142  | HSPA8  | Cytoplasm. Melanosome. Nucleus, nucleolus. Cell membrane. Note=Localized in cytoplasmic mRNP granules containing untranslated mRNAs. Translocates rapidly from the cytoplasm to the nuclei, and especially to the nucleoli, upon heat shock.                                                                                                                                                                                                         |
| LIM domain-binding protein 3                                   | O75112  | LDB3   | Cytoplasm, perinuclear region {ECO:0000269 PubMed:10427098}. Cell projection, pseudopodium {ECO:0000269 PubMed:10427098}. Cytoplasm, cytoskeleton {ECO:0000269 PubMed:10427098}. Cytoplasm, myofibril, sarcomere, Z line {ECO:0000269 PubMed:10427098}. Note=Localized to the cytoplasm around nuclei and pseudopodia of undifferentiated cells and detected throughout the myotubes of differentiated cells. Colocalizes with ACTN2 at the Z-lines. |
| Putative HLA class I histocompatibility antigen, alpha chain H | P01893  | HLA-H  | Cell membrane {ECO:0000305}; Single-pass membrane protein {ECO:0000305}.                                                                                                                                                                                                                                                                                                                                                                             |
| Adenylosuccinate synthetase isozyme 1                          | Q8N142  | ADSSL1 | Cytoplasm {ECO:0000255 HAMAP-Rule:MF_03126, ECO:0000269 PubMed:15786719}.                                                                                                                                                                                                                                                                                                                                                                            |
| HLA class I histocompatibility antigen, B-49 alpha chain       | P30487  | HLA-B  | Membrane; Single-pass type I membrane protein.                                                                                                                                                                                                                                                                                                                                                                                                       |
| HLA class I histocompatibility antigen, B-40 alpha chain       | Q04826  | HLA-B  | Membrane; Single-pass type I membrane protein.                                                                                                                                                                                                                                                                                                                                                                                                       |
| Glycogen phosphorylase, muscle form                            | P11217  | PYGM   | 0                                                                                                                                                                                                                                                                                                                                                                                                                                                    |
| Leucine-rich repeat-containing protein 47                      | Q8N1G4  | LRRC47 | 0                                                                                                                                                                                                                                                                                                                                                                                                                                                    |
| Protein S100-A1                                                | P23297  | S100A1 | Cytoplasm {ECO:0000269 PubMed:15171681}.                                                                                                                                                                                                                                                                                                                                                                                                             |
| Cytochrome c oxidase subunit 7A1, mitochondrial                | P24310  | COX7A1 | Mitochondrion inner membrane.                                                                                                                                                                                                                                                                                                                                                                                                                        |
| HLA class I histocompatibility antigen, A-1 alpha chain        | P30443  | HLA-A  | Cell membrane {ECO:0000269 PubMed:25880248}; Single-pass type I membrane protein {ECO:0000255}. Endoplasmic reticulum membrane {ECO:0000250 UniProtKB:P01892}; Single-pass type I membrane protein {ECO:0000255}.                                                                                                                                                                                                                                    |
| HLA class I histocompatibility antigen, B-8 alpha chain        | P30460  | HLA-B  | Membrane; Single-pass type I membrane protein.                                                                                                                                                                                                                                                                                                                                                                                                       |

**Supplemental Table 1 Page 2. All proteins quantitated in study**

| Protein Name                                              | Uniprot | Gene   | Subcellular localization                                                                                                                                                                                                                                                                                                                                                                                                    |
|-----------------------------------------------------------|---------|--------|-----------------------------------------------------------------------------------------------------------------------------------------------------------------------------------------------------------------------------------------------------------------------------------------------------------------------------------------------------------------------------------------------------------------------------|
| 0                                                         | Q9HBI1  | PARVB  | Cell junction, focal adhesion. Cell membrane; Peripheral membrane protein; Cytoplasmic side. Cytoplasm, cytoskeleton. Cell projection, lamellipodium. Cytoplasm, myofibril, sarcomere. Cytoplasm, myofibril, sarcomere, Z line. Note=Constituent of focal adhesions. Detected at the tips of the leading edge of cells. Colocalizes with F-actin at the tips of lamellipodia.                                               |
| HLA class I histocompatibility antigen, A-2 alpha chain   | P01892  | HLA-A  | Cell membrane {ECO:0000269 PubMed:21263072, ECO:0000269 PubMed:8805302}; Single-pass type I membrane protein {ECO:0000255}. Endoplasmic reticulum membrane {ECO:0000305 PubMed:8805302}; Single-pass type I membrane protein {ECO:0000255}.                                                                                                                                                                                 |
| Beta-2-microglobulin                                      | P61769  | B2M    | Secreted {ECO:0000269 PubMed:1336137, ECO:0000269 PubMed:7554280}. Cell surface {ECO:0000269 PubMed:25356553}. Note=Detected in serum and urine (PubMed:1336137, PubMed:7554280). {ECO:0000269 PubMed:7554280, ECO:0000269 Ref.6}.; Note=(Microbial infection) In the presence of M.tuberculosis EsxA-EsxB complex decreased amounts of B2M are found on the cell surface (PubMed:25356553). {ECO:0000269 PubMed:25356553}. |
| Phosphoglycerate kinase 1                                 | P00558  | PGK1   | Cytoplasm.                                                                                                                                                                                                                                                                                                                                                                                                                  |
| Antigen peptide transporter 1                             | Q03518  | TAP1   | Endoplasmic reticulum membrane; Multi-pass membrane protein. Note=The transmembrane segments seem to form a pore in the membrane.                                                                                                                                                                                                                                                                                           |
| Up-regulated during skeletal muscle growth protein 5      | Q96IX5  | ATP5MD | Mitochondrion membrane {ECO:0000269 PubMed:21345788}; Single-pass membrane protein {ECO:0000255}.                                                                                                                                                                                                                                                                                                                           |
| Heat shock protein beta-6                                 | O14558  | HSPB6  | Cytoplasm {ECO:0000269 PubMed:19464326}. Nucleus {ECO:0000269 PubMed:19464326}. Secreted {ECO:0000269 PubMed:22427880}. Note=Translocates to nuclear foci during heat shock. {ECO:0000269 PubMed:19464326}.                                                                                                                                                                                                                 |
| Tubulin alpha-4A chain                                    | P68366  | TUBA4A | Cytoplasm, cytoskeleton.                                                                                                                                                                                                                                                                                                                                                                                                    |
| Ubiquinone biosynthesis monooxygenase COQ6, mitochondrial | Q9Y2Z9  | COQ6   | Mitochondrion inner membrane {ECO:0000255 HAMAP-Rule:MF_03193}; Peripheral membrane protein {ECO:0000255 HAMAP-Rule:MF_03193}; Matrix side {ECO:0000255 HAMAP-Rule:MF_03193}. Golgi apparatus {ECO:0000255 HAMAP-Rule:MF_03193}. Cell projection {ECO:0000255 HAMAP-Rule:MF_03193}. Note=Localizes to cell processes and Golgi apparatus in podocytes. {ECO:0000255 HAMAP-Rule:MF_03193}.                                   |
| HLA class I histocompatibility antigen, B-7 alpha chain   | P01889  | HLA-B  | Membrane; Single-pass type I membrane protein.                                                                                                                                                                                                                                                                                                                                                                              |
| m-AAA protease-interacting protein 1, mitochondrial       | Q8WWC4  | MAIP1  | Mitochondrion matrix {ECO:0000269 PubMed:27642048}.                                                                                                                                                                                                                                                                                                                                                                         |
| COP9 signalosome complex subunit 7a                       | Q9UBW8  | COPS7A | Cytoplasm {ECO:0000269 PubMed:9535219}. Nucleus {ECO:0000269 PubMed:9535219}.                                                                                                                                                                                                                                                                                                                                               |
| NADH-cytochrome b5 reductase 3                            | P00387  | CYB5R3 | Isoform 1: Endoplasmic reticulum membrane; Lipid-anchor; Cytoplasmic side. Mitochondrion outer membrane; Lipid-anchor; Cytoplasmic side.; Isoform 2: Cytoplasm. Note=Produces the soluble form found in erythrocytes.                                                                                                                                                                                                       |
| Adenylate kinase 2, mitochondrial                         | P54819  | AK2    | Mitochondrion intermembrane space {ECO:0000255 HAMAP-Rule:MF_03168}.                                                                                                                                                                                                                                                                                                                                                        |

**Supplemental Table 1 Page 3. All proteins quantitated in study**

| Protein Name                                               | Uniprot | Gene     | Subcellular localization                                                                                                                                                                                                                                                                                                                                                                                                                                                                                                                                                                                                                                                                                                                                                                                                                                                                                                                      |
|------------------------------------------------------------|---------|----------|-----------------------------------------------------------------------------------------------------------------------------------------------------------------------------------------------------------------------------------------------------------------------------------------------------------------------------------------------------------------------------------------------------------------------------------------------------------------------------------------------------------------------------------------------------------------------------------------------------------------------------------------------------------------------------------------------------------------------------------------------------------------------------------------------------------------------------------------------------------------------------------------------------------------------------------------------|
| MICOS complex subunit MIC19                                | Q9NX63  | CHCHD3   | Mitochondrion inner membrane {ECO:0000250 UniProtKB:Q9CRB9}; Lipid-anchor {ECO:0000305}; Intermembrane side {ECO:0000250 UniProtKB:Q9CRB9}. Cytoplasm {ECO:0000269 PubMed:22567091}. Nucleus {ECO:0000269 PubMed:22567091}. Mitochondrion {ECO:0000269 PubMed:25781180, ECO:0000269 PubMed:25997101}.                                                                                                                                                                                                                                                                                                                                                                                                                                                                                                                                                                                                                                         |
| Delta-sarcoglycan                                          | Q92629  | SGCD     | Cell membrane, sarcolemma; Single-pass type II membrane protein. Cytoplasm, cytoskeleton.                                                                                                                                                                                                                                                                                                                                                                                                                                                                                                                                                                                                                                                                                                                                                                                                                                                     |
| HLA class II histocompatibility antigen, DRB1-1 beta chain | P04229  | HLA-DRB1 | Cell membrane {ECO:0000269 PubMed:18305173}; Single-pass type I membrane protein {ECO:0000269 PubMed:18305173}. Endoplasmic reticulum membrane {ECO:0000269 PubMed:18305173}; Single-pass type I membrane protein {ECO:0000269 PubMed:18305173}. Golgi apparatus, trans-Golgi network membrane {ECO:0000269 PubMed:18305173}; Single-pass type I membrane protein {ECO:0000269 PubMed:18305173}. Endosome membrane {ECO:0000269 PubMed:18305173}; Single-pass type I membrane protein {ECO:0000269 PubMed:18305173}. Lysosome membrane {ECO:0000269 PubMed:18305173}; Single-pass type I membrane protein {ECO:0000269 PubMed:18305173}. Late endosome membrane {ECO:0000269 PubMed:18305173}; Single-pass type I membrane protein {ECO:0000269 PubMed:18305173}. Note=The MHC class II complex transits through a number of intracellular compartments in the endocytic pathway until it reaches the cell membrane for antigen presentation. |
| Protein unc-45 homolog B                                   | Q8IWX7  | UNC45B   | Cytoplasm, cytosol {ECO:0000250}.                                                                                                                                                                                                                                                                                                                                                                                                                                                                                                                                                                                                                                                                                                                                                                                                                                                                                                             |
| HLA class I histocompatibility antigen, Cw-12 alpha chain  | P30508  | HLA-C    | Membrane; Single-pass type I membrane protein.                                                                                                                                                                                                                                                                                                                                                                                                                                                                                                                                                                                                                                                                                                                                                                                                                                                                                                |
| ATP synthase subunit beta, mitochondrial                   | P06576  | ATP5F1B  | Mitochondrion inner membrane {ECO:0000250 UniProtKB:P00829}; Peripheral membrane protein {ECO:0000250 UniProtKB:P00829}; Matrix side {ECO:0000250 UniProtKB:P00829}.                                                                                                                                                                                                                                                                                                                                                                                                                                                                                                                                                                                                                                                                                                                                                                          |
| Fructose-bisphosphate aldolase A                           | P04075  | ALDOA    | Cytoplasm, myofibril, sarcomere, I band. Cytoplasm, myofibril, sarcomere, M line. Note=In skeletal muscle, accumulates around the M line and within the I band, colocalizing with FBP2 on both sides of the Z line in the absence of Ca(2+). {ECO:0000250}.                                                                                                                                                                                                                                                                                                                                                                                                                                                                                                                                                                                                                                                                                   |
| Tripartite motif-containing protein 72                     | Q6ZMU5  | TRIM72   | Cell membrane, sarcolemma {ECO:0000250}. Cytoplasmic vesicle membrane {ECO:0000250}. Note=Tethered to plasma membrane and cytoplasmic vesicles via its interaction with phosphatidylserine. {ECO:0000250}.                                                                                                                                                                                                                                                                                                                                                                                                                                                                                                                                                                                                                                                                                                                                    |
| 39S ribosomal protein L49, mitochondrial                   | Q13405  | MRPL49   | Mitochondrion {ECO:0000269 PubMed:25278503, ECO:0000269 PubMed:25838379, ECO:0000269 PubMed:28892042}.                                                                                                                                                                                                                                                                                                                                                                                                                                                                                                                                                                                                                                                                                                                                                                                                                                        |
| Apolipoprotein A-I                                         | P02647  | APOA1    | Secreted.                                                                                                                                                                                                                                                                                                                                                                                                                                                                                                                                                                                                                                                                                                                                                                                                                                                                                                                                     |
| Mitochondrial pyruvate carrier 2                           | O95563  | MPC2     | Mitochondrion inner membrane {ECO:0000269 PubMed:22628558}; Multi-pass membrane protein {ECO:0000269 PubMed:22628558}.                                                                                                                                                                                                                                                                                                                                                                                                                                                                                                                                                                                                                                                                                                                                                                                                                        |

**Supplemental Table 1 Page 4. All proteins quantitated in study**

| Protein Name                               | Uniprot | Gene          | Subcellular localization                                                                                                                                                                                                                                                                                                                                                                                                                                                                                                                                                                                                                                                                                                                                                                                                                                                                                                          |
|--------------------------------------------|---------|---------------|-----------------------------------------------------------------------------------------------------------------------------------------------------------------------------------------------------------------------------------------------------------------------------------------------------------------------------------------------------------------------------------------------------------------------------------------------------------------------------------------------------------------------------------------------------------------------------------------------------------------------------------------------------------------------------------------------------------------------------------------------------------------------------------------------------------------------------------------------------------------------------------------------------------------------------------|
| Calcium uniporter protein, mitochondrial   | Q8NE86  | MCU           | Mitochondrion inner membrane {ECO:0000269 PubMed:21685886, ECO:0000269 PubMed:21685888, ECO:0000269 PubMed:23755363, ECO:0000269 PubMed:24231807, ECO:0000269 PubMed:27099988, ECO:0000305 PubMed:26341627}; Multi-pass membrane protein {ECO:0000269 PubMed:21685886, ECO:0000269 PubMed:21685888, ECO:0000269 PubMed:24231807}.                                                                                                                                                                                                                                                                                                                                                                                                                                                                                                                                                                                                 |
| Apoptosis-inducing factor 1, mitochondrial | O95831  | AIFM1         | Mitochondrion intermembrane space. Mitochondrion inner membrane. Cytoplasm. Nucleus. Cytoplasm, perinuclear region. Note=Proteolytic cleavage during or just after translocation into the mitochondrial intermembrane space (IMS) results in the formation of an inner-membrane-anchored mature form (AIFmit). During apoptosis, further proteolytic processing leads to a mature form, which is confined to the mitochondrial IMS in a soluble form (AIFsol). AIFsol is released to the cytoplasm in response to specific death signals, and translocated to the nucleus, where it induces nuclear apoptosis. Colocalizes with EIF3G in the nucleus and perinuclear region.; Isoform 3: Mitochondrion intermembrane space {ECO:0000269 PubMed:20111043}. Mitochondrion inner membrane {ECO:0000269 PubMed:20111043}. Note=Has a stronger membrane anchorage than isoform 1.; Isoform 5: Cytoplasm {ECO:0000269 PubMed:16365034}. |
| Basigin                                    | P35613  | BSG           | Cell membrane {ECO:0000269 PubMed:15946952, ECO:0000269 PubMed:17127621, ECO:0000269 PubMed:21536654}; Single-pass type I membrane protein {ECO:0000303 PubMed:15946952}. Melanosome {ECO:0000269 PubMed:17081065}. Note=Identified by mass spectrometry in melanosome fractions from stage I to stage IV. In spermatozoa, localized on the principal piece of caput and in the middle piece during transit in the corpus and cauda epididymides (By similarity). {ECO:0000250 UniProtKB:P18572, ECO:0000269 PubMed:17081065}.                                                                                                                                                                                                                                                                                                                                                                                                    |
| Complement C3                              | P01024  | C3            | Secreted.                                                                                                                                                                                                                                                                                                                                                                                                                                                                                                                                                                                                                                                                                                                                                                                                                                                                                                                         |
| ATP synthase subunit e, mitochondrial      | P56385  | ATP5ME        | Mitochondrion. Mitochondrion inner membrane.                                                                                                                                                                                                                                                                                                                                                                                                                                                                                                                                                                                                                                                                                                                                                                                                                                                                                      |
| Mitochondrial carrier homolog 2            | Q9Y6C9  | MTCH2         | Mitochondrion inner membrane {ECO:0000305}; Multi-pass membrane protein {ECO:0000305}.                                                                                                                                                                                                                                                                                                                                                                                                                                                                                                                                                                                                                                                                                                                                                                                                                                            |
| Hemoglobin subunit alpha                   | P69905  | HBA1;<br>HBA2 | 0                                                                                                                                                                                                                                                                                                                                                                                                                                                                                                                                                                                                                                                                                                                                                                                                                                                                                                                                 |
| Tubulin beta chain                         | P07437  | TUBB          | Cytoplasm, cytoskeleton {ECO:0000269 PubMed:26637975}.                                                                                                                                                                                                                                                                                                                                                                                                                                                                                                                                                                                                                                                                                                                                                                                                                                                                            |
| Heat shock protein beta-1                  | P04792  | HSPB1         | Cytoplasm {ECO:0000269 PubMed:10777697, ECO:0000269 PubMed:28144995}. Nucleus {ECO:0000269 PubMed:19464326}. Cytoplasm, cytoskeleton, spindle {ECO:0000269 PubMed:10777697}. Note=Cytoplasmic in interphase cells. Colocalizes with mitotic spindles in mitotic cells. Translocates to the nucleus during heat shock and resides in sub-nuclear structures known as SC35 speckles or nuclear splicing speckles. {ECO:0000269 PubMed:19464326}.                                                                                                                                                                                                                                                                                                                                                                                                                                                                                    |

**Supplemental Table 1 Page 5. All proteins quantitated in study**

| Protein Name                                                                | Uniprot | Gene    | Subcellular localization                                                                                                                                                                                                                                                                                                                                                                                                                                                               |
|-----------------------------------------------------------------------------|---------|---------|----------------------------------------------------------------------------------------------------------------------------------------------------------------------------------------------------------------------------------------------------------------------------------------------------------------------------------------------------------------------------------------------------------------------------------------------------------------------------------------|
| Immunoglobulin kappa light chain                                            | P0DOX7  | 0       | Secreted {ECO:0000303 PubMed:20176268, ECO:0000303 PubMed:22158414}. Cell membrane {ECO:0000303 PubMed:20176268, ECO:0000303 PubMed:22158414}.                                                                                                                                                                                                                                                                                                                                         |
| Immunoglobulin gamma-1 heavy chain                                          | P0DOX5  | 0       | Secreted {ECO:0000303 PubMed:20176268, ECO:0000303 PubMed:22158414}. Cell membrane {ECO:0000303 PubMed:20176268, ECO:0000303 PubMed:22158414}.                                                                                                                                                                                                                                                                                                                                         |
| Trimeric intracellular cation channel type B                                | Q9NVV0  | TMEM38B | Endoplasmic reticulum membrane {ECO:0000250 UniProtKB:Q9DAV9}; Multi-pass membrane protein {ECO:0000250 UniProtKB:Q9DAV9}.                                                                                                                                                                                                                                                                                                                                                             |
| Probable cysteine--tRNA ligase, mitochondrial                               | Q9HA77  | CARS2   | Mitochondrion matrix {ECO:0000250}.                                                                                                                                                                                                                                                                                                                                                                                                                                                    |
| HLA class I histocompatibility antigen, B-38 alpha chain                    | Q95365  | HLA-B   | Membrane; Single-pass type I membrane protein.                                                                                                                                                                                                                                                                                                                                                                                                                                         |
| NADH dehydrogenase [ubiquinone] 1 alpha subcomplex subunit 6                | P56556  | NDUFA6  | Mitochondrion inner membrane {ECO:0000305 PubMed:12611891}; Peripheral membrane protein {ECO:0000305}; Matrix side {ECO:0000305}.                                                                                                                                                                                                                                                                                                                                                      |
| NADH dehydrogenase [ubiquinone] 1 beta subcomplex subunit 11, mitochondrial | Q9NX14  | NDUFB11 | Mitochondrion inner membrane {ECO:0000305 PubMed:12611891}; Single-pass membrane protein {ECO:0000305}.                                                                                                                                                                                                                                                                                                                                                                                |
| Importin subunit alpha-3                                                    | O00629  | KPNA4   | Cytoplasm {ECO:0000250}. Nucleus {ECO:0000250}.                                                                                                                                                                                                                                                                                                                                                                                                                                        |
| Aldehyde dehydrogenase X, mitochondrial                                     | P30837  | ALDH1B1 | Mitochondrion matrix.                                                                                                                                                                                                                                                                                                                                                                                                                                                                  |
| ATP synthase subunit delta, mitochondrial                                   | P30049  | ATP5F1D | Mitochondrion. Mitochondrion inner membrane.                                                                                                                                                                                                                                                                                                                                                                                                                                           |
| ATP synthase subunit alpha, mitochondrial                                   | P25705  | ATP5F1A | Mitochondrion {ECO:0000269 PubMed:30146159}. Mitochondrion inner membrane {ECO:0000250 UniProtKB:P19483}; Peripheral membrane protein {ECO:0000250 UniProtKB:P19483}; Matrix side {ECO:0000250 UniProtKB:P19483}. Cell membrane {ECO:0000269 PubMed:10077593}; Peripheral membrane protein {ECO:0000269 PubMed:10077593}; Extracellular side {ECO:0000269 PubMed:10077593}. Note=Colocalizes with HRG on the cell surface of T-cells (PubMed:19285951). {ECO:0000269 PubMed:19285951}. |

**Supplemental Table 1 Page 6. All proteins quantitated in study**

| Protein Name                                             | Uniprot | Gene   | Subcellular localization                                                                                                                                                                                                                                                                                                                                                                                                                                                                                                                                                                                                                                                                                                                                                                                                                                                                                                                                                                                                                                                                                                                                                                                                                                                                                                                                                                                                                               |
|----------------------------------------------------------|---------|--------|--------------------------------------------------------------------------------------------------------------------------------------------------------------------------------------------------------------------------------------------------------------------------------------------------------------------------------------------------------------------------------------------------------------------------------------------------------------------------------------------------------------------------------------------------------------------------------------------------------------------------------------------------------------------------------------------------------------------------------------------------------------------------------------------------------------------------------------------------------------------------------------------------------------------------------------------------------------------------------------------------------------------------------------------------------------------------------------------------------------------------------------------------------------------------------------------------------------------------------------------------------------------------------------------------------------------------------------------------------------------------------------------------------------------------------------------------------|
| ATP-dependent RNA helicase DDX1                          | Q92499  | DDX1   | Nucleus. Cytoplasm. Cytoplasmic granule. Cytoplasm, cytosol {ECO:0000250 UniProtKB:Q91VR5}. Mitochondrion {ECO:0000250 UniProtKB:Q91VR5}. Note=Localized with MBNL1, TIAL1 and YBX1 in stress granules upon stress. Localized with CSTF2 in cleavage bodies. Forms large aggregates called DDX1 bodies. Relocalized into multiple foci (IR-induced foci or IRIF) after IR treatment, a process that depends on the presence of chromosomal DNA and/or RNA-DNA duplexes. Relocalized at sites of DNA double-strand breaks (DSBs) in an ATM-dependent manner after IR treatment. Colocalized with RELA in the nucleus upon TNF-alpha induction. Enters into the nucleus in case of active transcription while it accumulates in cytosol when transcription level is low (PubMed:24608264). Colocalizes in the cytosol with DDX21, DHX36 and TICAM1. Colocalizes in the mitochondria with TICAM1 and poly(I:C) RNA ligand. The multi-helicase-TICAM1 complex may translocate to the mitochondria upon poly(I:C) stimulation (By similarity). {ECO:0000250 UniProtKB:Q91VR5, ECO:0000269 PubMed:24608264}.; Cytoplasm {ECO:0000269 PubMed:20573827}. Note=(Microbial infection) Relocalized to the cytoplasm with a perinuclear staining pattern in avian infectious bronchitis virus (IBV)-infected cells (PubMed:20573827). Required for proper localization of HIV-1 Rev (PubMed:15567440). {ECO:0000269 PubMed:15567440, ECO:0000269 PubMed:20573827}. |
| Four and a half LIM domains protein 1                    | Q13642  | FHL1   | Isoform 1: Cytoplasm.; Isoform 3: Cytoplasm. Nucleus.; Isoform 2: Nucleus. Cytoplasm, cytosol. Note=Predominantly nuclear in myoblasts but is cytosolic in differentiated myotubes.                                                                                                                                                                                                                                                                                                                                                                                                                                                                                                                                                                                                                                                                                                                                                                                                                                                                                                                                                                                                                                                                                                                                                                                                                                                                    |
| Heat shock 70 kDa protein 1A                             | P0DMV8  | HSPA1A | Cytoplasm {ECO:0000269 PubMed:17289661}. Nucleus {ECO:0000269 PubMed:27137183}. Cytoplasm, cytoskeleton, microtubule organizing center, centrosome {ECO:0000269 PubMed:27137183}. Note=Localized in cytoplasmic mRNP granules containing untranslated mRNAs.                                                                                                                                                                                                                                                                                                                                                                                                                                                                                                                                                                                                                                                                                                                                                                                                                                                                                                                                                                                                                                                                                                                                                                                           |
| HLA class I histocompatibility antigen, A-24 alpha chain | P05534  | HLA-A  | Membrane; Single-pass type I membrane protein.                                                                                                                                                                                                                                                                                                                                                                                                                                                                                                                                                                                                                                                                                                                                                                                                                                                                                                                                                                                                                                                                                                                                                                                                                                                                                                                                                                                                         |
| Tripeptidyl-peptidase 1                                  | O14773  | TPP1   | Lysosome {ECO:0000269 PubMed:19941651}. Melanosome {ECO:0000269 PubMed:12643545}. Note=Identified by mass spectrometry in melanosome fractions from stage I to stage IV. {ECO:0000269 PubMed:12643545}.                                                                                                                                                                                                                                                                                                                                                                                                                                                                                                                                                                                                                                                                                                                                                                                                                                                                                                                                                                                                                                                                                                                                                                                                                                                |
| Plectin                                                  | Q15149  | PLEC   | Cytoplasm, cytoskeleton {ECO:0000269 PubMed:12482924}. Cell junction, hemidesmosome {ECO:0000269 PubMed:12482924}.                                                                                                                                                                                                                                                                                                                                                                                                                                                                                                                                                                                                                                                                                                                                                                                                                                                                                                                                                                                                                                                                                                                                                                                                                                                                                                                                     |
| Reticulon-2                                              | O75298  | RTN2   | Endoplasmic reticulum membrane {ECO:0000305}; Multi-pass membrane protein {ECO:0000305}.                                                                                                                                                                                                                                                                                                                                                                                                                                                                                                                                                                                                                                                                                                                                                                                                                                                                                                                                                                                                                                                                                                                                                                                                                                                                                                                                                               |
| Elongation factor Tu, mitochondrial                      | P49411  | TUFM   | Mitochondrion {ECO:0000269 PubMed:22749352}.                                                                                                                                                                                                                                                                                                                                                                                                                                                                                                                                                                                                                                                                                                                                                                                                                                                                                                                                                                                                                                                                                                                                                                                                                                                                                                                                                                                                           |
| 2,4-dienoyl-CoA reductase, mitochondrial                 | Q16698  | DECR1  | Mitochondrion.                                                                                                                                                                                                                                                                                                                                                                                                                                                                                                                                                                                                                                                                                                                                                                                                                                                                                                                                                                                                                                                                                                                                                                                                                                                                                                                                                                                                                                         |

**Supplemental Table 1 Page 7. All proteins quantitated in study**

| Protein Name                                                | Uniprot | Gene    | Subcellular localization                                                                                                                                                                                                                                                                                                                                                                                                                                                                                                                                                                                                                                    |
|-------------------------------------------------------------|---------|---------|-------------------------------------------------------------------------------------------------------------------------------------------------------------------------------------------------------------------------------------------------------------------------------------------------------------------------------------------------------------------------------------------------------------------------------------------------------------------------------------------------------------------------------------------------------------------------------------------------------------------------------------------------------------|
| HLA class II histocompatibility antigen, DR alpha chain     | P01903  | HLA-DRA | Cell membrane; Single-pass type I membrane protein. Endoplasmic reticulum membrane; Single-pass type I membrane protein. Golgi apparatus, trans-Golgi network membrane; Single-pass type I membrane protein. Endosome membrane; Single-pass type I membrane protein. Lysosome membrane; Single-pass type I membrane protein. Late endosome membrane; Single-pass type I membrane protein. Note=The MHC class II complex transits through a number of intracellular compartments in the endocytic pathway until it reaches the cell membrane for antigen presentation.                                                                                       |
| Ubiquinone biosynthesis O-methyltransferase, mitochondrial  | Q9NZJ6  | COQ3    | Mitochondrion inner membrane {ECO:0000255 HAMAP-Rule:MF_03190}; Peripheral membrane protein {ECO:0000255 HAMAP-Rule:MF_03190}; Matrix side {ECO:0000255 HAMAP-Rule:MF_03190}.                                                                                                                                                                                                                                                                                                                                                                                                                                                                               |
| Creatine kinase M-type                                      | P06732  | CKM     | Cytoplasm.                                                                                                                                                                                                                                                                                                                                                                                                                                                                                                                                                                                                                                                  |
| Sideroflexin-1                                              | Q9H9B4  | SFXN1   | Mitochondrion inner membrane {ECO:0000269 PubMed:30442778}; Multi-pass membrane protein {ECO:0000255}.                                                                                                                                                                                                                                                                                                                                                                                                                                                                                                                                                      |
| 2-oxoisovalerate dehydrogenase subunit alpha, mitochondrial | P12694  | BCKDHA  | Mitochondrion matrix.                                                                                                                                                                                                                                                                                                                                                                                                                                                                                                                                                                                                                                       |
| Tubulin beta-4B chain                                       | P68371  | TUBB4B  | Cytoplasm, cytoskeleton.                                                                                                                                                                                                                                                                                                                                                                                                                                                                                                                                                                                                                                    |
| HLA class I histocompatibility antigen, B-41 alpha chain    | P30479  | HLA-B   | Membrane; Single-pass type I membrane protein.                                                                                                                                                                                                                                                                                                                                                                                                                                                                                                                                                                                                              |
| Immunoglobulin lambda constant 2                            | P0DOY2  | IGLC2   | Secreted {ECO:0000303 PubMed:20176268, ECO:0000303 PubMed:22158414}. Cell membrane {ECO:0000303 PubMed:20176268, ECO:0000303 PubMed:22158414}.                                                                                                                                                                                                                                                                                                                                                                                                                                                                                                              |
| Glutathione hydrolase 5 proenzyme                           | P36269  | GGT5    | Membrane {ECO:0000250}; Single-pass type II membrane protein {ECO:0000250}.                                                                                                                                                                                                                                                                                                                                                                                                                                                                                                                                                                                 |
| Alpha-actinin-4                                             | O43707  | ACTN4   | Nucleus {ECO:0000269 PubMed:22351778, ECO:0000269 PubMed:9508771}. Cytoplasm {ECO:0000269 PubMed:22351778, ECO:0000269 PubMed:9508771}. Cell junction {ECO:0000250 UniProtKB:P57780}. Cytoplasm, cytoskeleton, stress fiber {ECO:0000269 PubMed:9508771}. Note=Localized in cytoplasmic mRNP granules containing untranslated mRNAs. Nuclear translocation can be induced by the PI3 kinase inhibitor wortmannin or by cytochalasin D. Exclusively localized in the nucleus in a limited number of cell lines (breast cancer cell line MCF-7, oral floor cancer IMC-2, and bladder cancer KU-7). {ECO:0000269 PubMed:17289661, ECO:0000269 PubMed:9508771}. |
| Glutathione S-transferase kappa 1                           | Q9Y2Q3  | GSTK1   | Peroxisome {ECO:0000269 PubMed:14742434}.                                                                                                                                                                                                                                                                                                                                                                                                                                                                                                                                                                                                                   |
| Myosin-7                                                    | P12883  | MYH7    | Cytoplasm, myofibril {ECO:0000250 UniProtKB:P02564}. Cytoplasm, myofibril, sarcomere {ECO:0000250 UniProtKB:P02564}. Note=Thick filaments of the myofibrils. {ECO:0000250 UniProtKB:P02564}.                                                                                                                                                                                                                                                                                                                                                                                                                                                                |
| PDZ and LIM domain protein 3                                | Q53GG5  | PDLIM3  | Cytoplasm, myofibril, sarcomere, Z line {ECO:0000269 PubMed:10063829}. Note=Localizes to myofiber Z-lines.                                                                                                                                                                                                                                                                                                                                                                                                                                                                                                                                                  |

**Supplemental Table 1 Page 8. All proteins quantitated in study**

| Protein Name                                                                                                     | Uniprot | Gene     | Subcellular localization                                                                                                                                                                                                                                                                                                                                                  |
|------------------------------------------------------------------------------------------------------------------|---------|----------|---------------------------------------------------------------------------------------------------------------------------------------------------------------------------------------------------------------------------------------------------------------------------------------------------------------------------------------------------------------------------|
| Dihydrolipoyllysine-residue succinyltransferase component of 2-oxoglutarate dehydrogenase complex, mitochondrial | P36957  | DLST     | Mitochondrion matrix {ECO:0000305 PubMed:29211711}. Nucleus {ECO:0000269 PubMed:29211711}. Note=Mainly localizes in the mitochondrion. A small fraction localizes to the nucleus, where the 2-oxoglutarate dehydrogenase complex is required for histone succinylation. {ECO:0000269 PubMed:29211711}.                                                                    |
| Troponin T, slow skeletal muscle                                                                                 | P13805  | TNNT1    | 0                                                                                                                                                                                                                                                                                                                                                                         |
| Superoxide dismutase [Mn], mitochondrial                                                                         | P04179  | SOD2     | Mitochondrion matrix.                                                                                                                                                                                                                                                                                                                                                     |
| Mast cell carboxypeptidase A                                                                                     | P15088  | CPA3     | Cytoplasmic vesicle, secretory vesicle. Note=Secretory granules.                                                                                                                                                                                                                                                                                                          |
| L-lactate dehydrogenase B chain                                                                                  | P07195  | LDHB     | Cytoplasm.                                                                                                                                                                                                                                                                                                                                                                |
| Translocator protein                                                                                             | P30536  | TSPO     | Mitochondrion membrane {ECO:0000269 PubMed:1847678}; Multi-pass membrane protein {ECO:0000269 PubMed:1847678}.                                                                                                                                                                                                                                                            |
| Mitochondrial 2-oxoglutarate/malate carrier protein                                                              | Q02978  | SLC25A11 | Mitochondrion inner membrane {ECO:0000250 UniProtKB:P97700}; Multi-pass membrane protein {ECO:0000250 UniProtKB:P97700}.                                                                                                                                                                                                                                                  |
| Pyruvate kinase PKM                                                                                              | P14618  | PKM      | Cytoplasm {ECO:0000269 PubMed:25263439}. Nucleus. Note=Translocates to the nucleus in response to different apoptotic stimuli. Nuclear translocation is sufficient to induce cell death that is caspase independent, isoform-specific and independent of its enzymatic activity.                                                                                          |
| 14-3-3 protein gamma                                                                                             | P61981  | YWHAG    | Cytoplasm {ECO:0000250}.                                                                                                                                                                                                                                                                                                                                                  |
| Transmembrane protein 109                                                                                        | Q9BVC6  | TMEM109  | Nucleus outer membrane {ECO:0000250 UniProtKB:O77751}; Multi-pass membrane protein {ECO:0000250 UniProtKB:O77751}. Endoplasmic reticulum membrane {ECO:0000250 UniProtKB:O77751}; Multi-pass membrane protein {ECO:0000250 UniProtKB:O77751}. Sarcoplasmic reticulum membrane {ECO:0000250 UniProtKB:O77751}; Multi-pass membrane protein {ECO:0000250 UniProtKB:O77751}. |
| CDGSH iron-sulfur domain-containing protein 2                                                                    | Q8N5K1  | CISD2    | Endoplasmic reticulum membrane; Single-pass membrane protein. Mitochondrion outer membrane; Single-pass membrane protein. Note=According to PubMed:20010695, it mainly localizes to the endoplasmic reticulum. However, experiments in mouse showed that it mainly localizes to the mitochondrion outer membrane.                                                         |
| Phosphate carrier protein, mitochondrial                                                                         | Q00325  | SLC25A3  | Mitochondrion inner membrane; Multi-pass membrane protein.                                                                                                                                                                                                                                                                                                                |
| NAD-dependent malic enzyme, mitochondrial                                                                        | P23368  | ME2      | Mitochondrion matrix.                                                                                                                                                                                                                                                                                                                                                     |
| HIG1 domain family member 1A, mitochondrial                                                                      | Q9Y241  | HIGD1A   | Mitochondrion membrane {ECO:0000255 PROSITE-ProRule:PRU00836, ECO:0000269 PubMed:22342701}; Multi-pass membrane protein {ECO:0000255 PROSITE-ProRule:PRU00836, ECO:0000269 PubMed:22342701}. Mitochondrion inner membrane {ECO:0000305 PubMed:22342701}.                                                                                                                  |
| NADH dehydrogenase [ubiquinone] 1 alpha subcomplex subunit 7                                                     | O95182  | NDUFA7   | Mitochondrion inner membrane {ECO:0000305 PubMed:12611891}; Peripheral membrane protein {ECO:0000305}; Matrix side {ECO:0000305}.                                                                                                                                                                                                                                         |

**Supplemental Table 1 Page 9. All proteins quantitated in study**

| Protein Name                                                                      | Uniprot | Gene    | Subcellular localization                                                                                                                                                                                                                                                                                                                                                                                                                                                                                                                                                                        |
|-----------------------------------------------------------------------------------|---------|---------|-------------------------------------------------------------------------------------------------------------------------------------------------------------------------------------------------------------------------------------------------------------------------------------------------------------------------------------------------------------------------------------------------------------------------------------------------------------------------------------------------------------------------------------------------------------------------------------------------|
| Desmin                                                                            | P17661  | DES     | Cytoplasm, myofibril, sarcomere, Z line {ECO:0000269 PubMed:24200904, ECO:0000269 PubMed:26724190}. Cytoplasm {ECO:0000269 PubMed:25394388}. Cell membrane, sarcolemma {ECO:0000269 PubMed:25394388}. Nucleus {ECO:0000250 UniProtKB:P31001}. Note=Localizes in the intercalated disks which occur at the Z line of cardiomyocytes (PubMed:24200904, PubMed:26724190). Localizes in the nucleus exclusively in differentiating cardiac progenitor cells and premature cardiomyocytes (By similarity). {ECO:0000250 UniProtKB:P31001, ECO:0000269 PubMed:24200904, ECO:0000269 PubMed:26724190}. |
| 3-ketoacyl-CoA thiolase, peroxisomal                                              | P09110  | ACAA1   | Peroxisome.                                                                                                                                                                                                                                                                                                                                                                                                                                                                                                                                                                                     |
| Myc box-dependent-interacting protein 1                                           | O00499  | BIN1    | Isoform BIN1: Nucleus {ECO:0000269 PubMed:8782822}. Cytoplasm {ECO:0000269 PubMed:9182667}. Endosome {ECO:0000250 UniProtKB:O08539}. Cell membrane, sarcolemma, T-tubule {ECO:0000250 UniProtKB:O08839}.; Isoform IIA: Cytoplasm {ECO:0000269 PubMed:9182667}.                                                                                                                                                                                                                                                                                                                                  |
| Ferrochelatase, mitochondrial                                                     | P22830  | FECH    | Mitochondrion inner membrane; Peripheral membrane protein; Matrix side.                                                                                                                                                                                                                                                                                                                                                                                                                                                                                                                         |
| Serine/threonine-protein phosphatase 2A 65 kDa regulatory subunit A alpha isoform | P30153  | PPP2R1A | Cytoplasm {ECO:0000250 UniProtKB:Q32PI5}. Nucleus {ECO:0000269 PubMed:30611118}. Chromosome, centromere {ECO:0000269 PubMed:16580887}. Lateral cell membrane {ECO:0000269 PubMed:15525651}. Cell projection, dendrite {ECO:0000269 PubMed:15525651}. Note=Centromeric localization requires the presence of BUB1. {ECO:0000269 PubMed:16580887}.                                                                                                                                                                                                                                                |
| Chymase                                                                           | P23946  | CMA1    | Secreted. Cytoplasmic granule. Note=Mast cell granules.                                                                                                                                                                                                                                                                                                                                                                                                                                                                                                                                         |
| Perilipin-4                                                                       | Q96Q06  | PLIN4   | Cell membrane {ECO:0000250 UniProtKB:O88492}. Cytoplasm {ECO:0000250 UniProtKB:O88492}. Lipid droplet {ECO:0000250 UniProtKB:O88492}. Note=Nascent lipid droplet surface-associated; association with lipid droplets is triacylglycerol synthesis-dependent. {ECO:0000250 UniProtKB:O88492}.                                                                                                                                                                                                                                                                                                    |
| Alpha-enolase                                                                     | P06733  | ENO1    | Cytoplasm {ECO:0000269 PubMed:10802057}. Cell membrane {ECO:0000269 PubMed:10802057}. Cytoplasm, myofibril, sarcomere, M line {ECO:0000269 PubMed:10802057}. Note=Can translocate to the plasma membrane in either the homodimeric (alpha/alpha) or heterodimeric (alpha/gamma) form. ENO1 is localized to the M line.; Isoform MBP-1: Nucleus.                                                                                                                                                                                                                                                 |

**Supplemental Table 1 Page 10. All proteins quantitated in study**

| Protein Name                                                  | Uniprot | Gene   | Subcellular localization                                                                                                                                                                                                                                                                                                                                                                                                                                                                                                                                                                                                                                                                                                                                                                                                                                                                                                                                                                                                                                                                                                  |
|---------------------------------------------------------------|---------|--------|---------------------------------------------------------------------------------------------------------------------------------------------------------------------------------------------------------------------------------------------------------------------------------------------------------------------------------------------------------------------------------------------------------------------------------------------------------------------------------------------------------------------------------------------------------------------------------------------------------------------------------------------------------------------------------------------------------------------------------------------------------------------------------------------------------------------------------------------------------------------------------------------------------------------------------------------------------------------------------------------------------------------------------------------------------------------------------------------------------------------------|
| cAMP-dependent protein kinase catalytic subunit alpha         | P17612  | PRKACA | Cytoplasm. Cell membrane. Nucleus {ECO:0000250}. Mitochondrion {ECO:0000250}. Membrane {ECO:0000305}; Lipid-anchor {ECO:0000305}. Note=Translocates into the nucleus (monomeric catalytic subunit). The inactive holoenzyme is found in the cytoplasm. Distributed throughout the cytoplasm in meiotically incompetent oocytes. Associated to mitochondrion as meiotic competence is acquired. Aggregates around the germinal vesicles (GV) at the immature GV stage oocytes (By similarity). Colocalizes with HSF1 in nuclear stress bodies (nSBs) upon heat shock (PubMed:21085490). {ECO:0000250, ECO:0000269 PubMed:21085490}.; Isoform 2: Cell projection, cilium, flagellum {ECO:0000269 PubMed:10906071}. Cytoplasmic vesicle, secretory vesicle, acrosome {ECO:0000250 UniProtKB:P05132}. Note=Expressed in the midpiece region of the sperm flagellum (PubMed:10906071). Colocalizes with MROH2B and TCP11 on the acrosome and tail regions in round spermatids and spermatozoa regardless of the capacitation status of the sperm (By similarity). {ECO:0000250 UniProtKB:P05132, ECO:0000269 PubMed:10906071}. |
| NADH dehydrogenase [ubiquinone] flavoprotein 2, mitochondrial | P19404  | NDUFV2 | Mitochondrion inner membrane.                                                                                                                                                                                                                                                                                                                                                                                                                                                                                                                                                                                                                                                                                                                                                                                                                                                                                                                                                                                                                                                                                             |
| Myosin light chain 6B                                         | P14649  | MYL6B  | 0                                                                                                                                                                                                                                                                                                                                                                                                                                                                                                                                                                                                                                                                                                                                                                                                                                                                                                                                                                                                                                                                                                                         |
| Carbonic anhydrase 3                                          | P07451  | CA3    | Cytoplasm.                                                                                                                                                                                                                                                                                                                                                                                                                                                                                                                                                                                                                                                                                                                                                                                                                                                                                                                                                                                                                                                                                                                |

**Supplemental Table 1 Page 11. All proteins quantitated in study**

| Protein Name                                            | Uniprot | Gene  | Subcellular localization                                                                                                                                                                                                                                                                                                                                                                                                                                                                                                                                                                                                                                                                                                                                                                                                                                                                                                                                                                                                                                                                                                                                                                                                                                                                                                                                                                                                                                                                                                                                                                                                                                                                                                                                                                                                                                                                                                                                                                                                                                                                                                                                                                                                                                                                                                                                                                                                                                                                                                     |
|---------------------------------------------------------|---------|-------|------------------------------------------------------------------------------------------------------------------------------------------------------------------------------------------------------------------------------------------------------------------------------------------------------------------------------------------------------------------------------------------------------------------------------------------------------------------------------------------------------------------------------------------------------------------------------------------------------------------------------------------------------------------------------------------------------------------------------------------------------------------------------------------------------------------------------------------------------------------------------------------------------------------------------------------------------------------------------------------------------------------------------------------------------------------------------------------------------------------------------------------------------------------------------------------------------------------------------------------------------------------------------------------------------------------------------------------------------------------------------------------------------------------------------------------------------------------------------------------------------------------------------------------------------------------------------------------------------------------------------------------------------------------------------------------------------------------------------------------------------------------------------------------------------------------------------------------------------------------------------------------------------------------------------------------------------------------------------------------------------------------------------------------------------------------------------------------------------------------------------------------------------------------------------------------------------------------------------------------------------------------------------------------------------------------------------------------------------------------------------------------------------------------------------------------------------------------------------------------------------------------------------|
| Annexin A1                                              | P04083  | ANXA1 | Nucleus {ECO:0000269 PubMed:10772777, ECO:0000269 PubMed:19625660}. Cytoplasm {ECO:0000269 PubMed:10772777, ECO:0000269 PubMed:17008549, ECO:0000269 PubMed:19625660}. Cell projection, cilium {ECO:0000250 UniProtKB:P46193}. Cell membrane {ECO:0000269 PubMed:10772777}. Membrane {ECO:0000269 PubMed:17008549, ECO:0000269 PubMed:2532504, ECO:0000269 PubMed:8557678}; Peripheral membrane protein {ECO:0000269 PubMed:2532504, ECO:0000269 PubMed:8557678}. Endosome membrane {ECO:0000250 UniProtKB:P07150}; Peripheral membrane protein {ECO:0000250 UniProtKB:P07150}. Basolateral cell membrane {ECO:0000250 UniProtKB:P51662}. Apical cell membrane {ECO:0000250 UniProtKB:P10107}. Lateral cell membrane {ECO:0000250 UniProtKB:P10107}. Secreted {ECO:0000269 PubMed:17008549, ECO:0000269 PubMed:19625660, ECO:0000269 PubMed:25664854}. Secreted, extracellular space {ECO:0000269 PubMed:25664854}. Cell membrane {ECO:0000269 PubMed:10772777, ECO:0000269 PubMed:19625660, ECO:0000269 PubMed:25664854}; Peripheral membrane protein {ECO:0000269 PubMed:10772777, ECO:0000269 PubMed:19625660, ECO:0000269 PubMed:25664854}; Extracellular side {ECO:0000269 PubMed:10772777, ECO:0000269 PubMed:19625660, ECO:0000269 PubMed:25664854}. Secreted, exosome {ECO:0000269 PubMed:25664854}. Cytoplasmic vesicle, secretory vesicle lumen {ECO:0000269 PubMed:10772777}. Cell projection, phagocytic cup {ECO:0000250 UniProtKB:P10107}. Early endosome {ECO:0000250 UniProtKB:P19619}. Cytoplasmic vesicle membrane {ECO:0000250 UniProtKB:P19619}; Peripheral membrane protein {ECO:0000250 UniProtKB:P19619}. Note=Secreted, at least in part via exosomes and other secretory vesicles. Detected in exosomes and other extracellular vesicles (PubMed:25664854). Detected in gelatinase granules in resting neutrophils (PubMed:10772777). Secretion is increased in response to wounding and inflammation (PubMed:25664854). Secretion is increased upon T-cell activation (PubMed:17008549). Neutrophil adhesion to endothelial cells stimulates secretion via gelatinase granules, but foreign particle phagocytosis has no effect (PubMed:10772777). Colocalizes with actin fibers at phagocytic cups (By similarity). Displays calcium-dependent binding to phospholipid membranes (PubMed:2532504, PubMed:8557678). {ECO:0000250 UniProtKB:P10107, ECO:0000269 PubMed:10772777, ECO:0000269 PubMed:17008549, ECO:0000269 PubMed:2532504, ECO:0000269 PubMed:25664854, ECO:0000269 PubMed:8557678}. |
| Mitochondrial pyruvate carrier 1                        | Q9Y5U8  | MPC1  | Mitochondrion inner membrane {ECO:0000269 PubMed:22628558}; Multi-pass membrane protein {ECO:0000269 PubMed:22628558}.                                                                                                                                                                                                                                                                                                                                                                                                                                                                                                                                                                                                                                                                                                                                                                                                                                                                                                                                                                                                                                                                                                                                                                                                                                                                                                                                                                                                                                                                                                                                                                                                                                                                                                                                                                                                                                                                                                                                                                                                                                                                                                                                                                                                                                                                                                                                                                                                       |
| Metaxin-1                                               | Q13505  | MTX1  | Membrane {ECO:0000305}; Single-pass type I membrane protein {ECO:0000305}. Mitochondrion outer membrane {ECO:0000250}.                                                                                                                                                                                                                                                                                                                                                                                                                                                                                                                                                                                                                                                                                                                                                                                                                                                                                                                                                                                                                                                                                                                                                                                                                                                                                                                                                                                                                                                                                                                                                                                                                                                                                                                                                                                                                                                                                                                                                                                                                                                                                                                                                                                                                                                                                                                                                                                                       |
| HLA class I histocompatibility antigen, A-3 alpha chain | P04439  | HLA-A | Cell membrane {ECO:0000250 UniProtKB:P01892}; Single-pass type I membrane protein {ECO:0000255}. Endoplasmic reticulum membrane {ECO:0000250 UniProtKB:P01892}; Single-pass type I membrane protein {ECO:0000255}.                                                                                                                                                                                                                                                                                                                                                                                                                                                                                                                                                                                                                                                                                                                                                                                                                                                                                                                                                                                                                                                                                                                                                                                                                                                                                                                                                                                                                                                                                                                                                                                                                                                                                                                                                                                                                                                                                                                                                                                                                                                                                                                                                                                                                                                                                                           |

**Supplemental Table 1 Page 12. All proteins quantitated in study**

| Protein Name                                            | Uniprot | Gene     | Subcellular localization                                                                                                                                                                                                                                                                                                                                                                            |
|---------------------------------------------------------|---------|----------|-----------------------------------------------------------------------------------------------------------------------------------------------------------------------------------------------------------------------------------------------------------------------------------------------------------------------------------------------------------------------------------------------------|
| Calcium-binding mitochondrial carrier protein SCaMC-1   | Q6NUK1  | SLC25A24 | Mitochondrion inner membrane {ECO:0000269 PubMed:15054102, ECO:0000269 PubMed:15123600, ECO:0000269 PubMed:22015608}; Multi-pass membrane protein {ECO:0000269 PubMed:15054102, ECO:0000269 PubMed:15123600, ECO:0000269 PubMed:22015608}.                                                                                                                                                          |
| 10 kDa heat shock protein, mitochondrial                | P61604  | HSPE1    | Mitochondrion matrix.                                                                                                                                                                                                                                                                                                                                                                               |
| Myotilin                                                | Q9UBF9  | MYOT     | Cell membrane, sarcolemma {ECO:0000269 PubMed:10369880}. Cytoplasm, cytoskeleton {ECO:0000269 PubMed:10369880}. Cytoplasm, myofibril, sarcomere, Z line {ECO:0000269 PubMed:16076904}. Note=Sarcomeric, also localized to the sarcolemma (PubMed:10369880). Colocalizes with MYOZ1 at the Z-lines in skeletal muscle (PubMed:16076904). {ECO:0000269 PubMed:10369880, ECO:0000269 PubMed:16076904}. |
| Guanine nucleotide-binding protein G(i) subunit alpha-2 | P04899  | GNAI2    | Cytoplasm {ECO:0000269 PubMed:17635935}. Cytoplasm, cytoskeleton, microtubule organizing center, centrosome {ECO:0000269 PubMed:17635935}. Cell membrane {ECO:0000269 PubMed:17635935}. Membrane {ECO:0000305}; Lipid-anchor {ECO:0000305}. Note=Localizes in the centrosomes of interphase and mitotic cells. Detected at the cleavage furrow and/or the midbody.                                  |
| Junctional sarcoplasmic reticulum protein 1             | Q96MG2  | JSRP1    | Sarcoplasmic reticulum membrane {ECO:0000250}. Endoplasmic reticulum membrane {ECO:0000250}. Note=Colocalizes with ryanodine receptors at the sarcoplasmic reticulum triad membranes. {ECO:0000250}.                                                                                                                                                                                                |
| NADH dehydrogenase [ubiquinone] iron-sulfur protein 5   | O43920  | NDUFS5   | Mitochondrion inner membrane {ECO:0000305 PubMed:12611891}; Peripheral membrane protein {ECO:0000305}. Mitochondrion intermembrane space {ECO:0000305}.                                                                                                                                                                                                                                             |
| Collagen alpha-2(I) chain                               | P08123  | COL1A2   | Secreted, extracellular space, extracellular matrix {ECO:0000255 PROSITE-ProRule:PRU00793}.                                                                                                                                                                                                                                                                                                         |
| Prohibitin                                              | P35232  | PHB      | Mitochondrion inner membrane {ECO:0000269 PubMed:20959514}. Nucleus {ECO:0000269 PubMed:20959514}.                                                                                                                                                                                                                                                                                                  |
| Calpain small subunit 1                                 | P04632  | CAPNS1   | Cytoplasm {ECO:0000250}. Cell membrane {ECO:0000250}. Note=Translocates to the plasma membrane upon calcium binding. {ECO:0000250}.                                                                                                                                                                                                                                                                 |
| Sarcalumenin                                            | Q86TD4  | SRL      | Sarcoplasmic reticulum lumen {ECO:0000250}. Note=Associated through calcium with the membrane. {ECO:0000250}.                                                                                                                                                                                                                                                                                       |

**Supplemental Table 1 Page 13. All proteins quantitated in study**

| Protein Name                                     | Uniprot | Gene  | Subcellular localization                                                                                                                                                                                                                                                                                                                                                                                                                                                                                                                                                                                                                                                                                                                                                                                                                                                                                                                                                                                                                                                                                                                                                                                                                                                                                                                                                                                                                                                                                                                                                                                                                                                                                    |
|--------------------------------------------------|---------|-------|-------------------------------------------------------------------------------------------------------------------------------------------------------------------------------------------------------------------------------------------------------------------------------------------------------------------------------------------------------------------------------------------------------------------------------------------------------------------------------------------------------------------------------------------------------------------------------------------------------------------------------------------------------------------------------------------------------------------------------------------------------------------------------------------------------------------------------------------------------------------------------------------------------------------------------------------------------------------------------------------------------------------------------------------------------------------------------------------------------------------------------------------------------------------------------------------------------------------------------------------------------------------------------------------------------------------------------------------------------------------------------------------------------------------------------------------------------------------------------------------------------------------------------------------------------------------------------------------------------------------------------------------------------------------------------------------------------------|
| Unconventional myosin-Ic                         | O00159  | MYO1C | Isoform 1: Cytoplasm {ECO:0000269 PubMed:22736583}. Nucleus {ECO:0000269 PubMed:22736583}. Note=Colocalizes with RNA polymerase II. Absent from nucleoli and does not colocalize with RNA polymerase I. Translocates to nuclear speckles upon exposure to inhibitors of RNA polymerase II transcription.; Isoform 2: Cytoplasm. Cell membrane {ECO:0000250}; Peripheral membrane protein {ECO:0000250}; Cytoplasmic side {ECO:0000250}. Cell projection, stereocilium membrane {ECO:0000250}. Cell projection, ruffle {ECO:0000250}. Cytoplasmic vesicle {ECO:0000250}. Note=Colocalizes with CABP1 and CIB1 at cell margin, membrane ruffles and punctate regions on the cell membrane. Colocalizes in adipocytes with GLUT4 at actin-based membranes. Colocalizes with GLUT4 at insulin-induced ruffles at the cell membrane. Localizes transiently at cell membrane to region known to be enriched in PIP2. Activation of phospholipase C results in its redistribution to the cytoplasm (By similarity). {ECO:0000250}.; Isoform 3: Nucleus, nucleoplasm. Nucleus, nucleolus. Nucleus, nuclear pore complex. Note=Colocalizes with RNA polymerase II in the nucleus. Colocalizes with RNA polymerase I in nucleoli (By similarity). In the nucleolus, is localized predominantly in dense fibrillar component (DFC) and in granular component (GC). Accumulates strongly in DFC and GC during activation of transcription. Colocalizes with transcription sites. Colocalizes in the granular cortex at the periphery of the nucleolus with RPS6. Colocalizes in nucleoplasm with RPS6 and actin that are in contact with RNP particles. Colocalizes with RPS6 at the nuclear pore level. {ECO:0000250}. |
| Ezrin                                            | P15311  | EZR   | Apical cell membrane {ECO:0000269 PubMed:18046454}; Peripheral membrane protein {ECO:0000269 PubMed:18046454}; Cytoplasmic side {ECO:0000269 PubMed:18046454}. Cell projection {ECO:0000269 PubMed:18046454}. Cell projection, microvillus membrane {ECO:0000269 PubMed:18046454}; Peripheral membrane protein {ECO:0000269 PubMed:18046454}; Cytoplasmic side {ECO:0000269 PubMed:18046454}. Cell projection, ruffle membrane {ECO:0000269 PubMed:18046454}; Peripheral membrane protein {ECO:0000269 PubMed:18046454}; Cytoplasmic side {ECO:0000269 PubMed:18046454}. Cytoplasm, cell cortex {ECO:0000269 PubMed:18046454}. Cytoplasm, cytoskeleton {ECO:0000269 PubMed:18046454}. Cell projection, microvillus {ECO:0000250 UniProtKB:P26040}. Note=Localization to the apical membrane of parietal cells depends on the interaction with MPP5. Localizes to cell extensions and peripheral processes of astrocytes (By similarity). Microvillar peripheral membrane protein (cytoplasmic side). {ECO:0000250 UniProtKB:P31977}.                                                                                                                                                                                                                                                                                                                                                                                                                                                                                                                                                                                                                                                                        |
| Peptidyl-prolyl cis-trans isomerase<br>FKBP3     | Q00688  | FKBP3 | Nucleus.                                                                                                                                                                                                                                                                                                                                                                                                                                                                                                                                                                                                                                                                                                                                                                                                                                                                                                                                                                                                                                                                                                                                                                                                                                                                                                                                                                                                                                                                                                                                                                                                                                                                                                    |
| Sulfide:quinone oxidoreductase,<br>mitochondrial | Q9Y6N5  | SQOR  | Mitochondrion {ECO:0000305}.                                                                                                                                                                                                                                                                                                                                                                                                                                                                                                                                                                                                                                                                                                                                                                                                                                                                                                                                                                                                                                                                                                                                                                                                                                                                                                                                                                                                                                                                                                                                                                                                                                                                                |

**Supplemental Table 1 Page 14. All proteins quantitated in study**

| Protein Name                                                                 | Uniprot | Gene    | Subcellular localization                                                                                                                                                                                                                                                                                                                                                                                                                                                                                                                                                                                                                                                                                                                                                                                                                                                                                                                                                                                                                                                                                                                                                                          |
|------------------------------------------------------------------------------|---------|---------|---------------------------------------------------------------------------------------------------------------------------------------------------------------------------------------------------------------------------------------------------------------------------------------------------------------------------------------------------------------------------------------------------------------------------------------------------------------------------------------------------------------------------------------------------------------------------------------------------------------------------------------------------------------------------------------------------------------------------------------------------------------------------------------------------------------------------------------------------------------------------------------------------------------------------------------------------------------------------------------------------------------------------------------------------------------------------------------------------------------------------------------------------------------------------------------------------|
| Redox-regulatory protein FAM213A                                             | Q9BRX8  | PRXL2A  | Cytoplasm {ECO:0000269 PubMed:19951071}. Secreted {ECO:0000269 PubMed:26438880}. Note=Secreted from mature adipocytes but not from preadipocytes. {ECO:0000269 PubMed:26438880}.                                                                                                                                                                                                                                                                                                                                                                                                                                                                                                                                                                                                                                                                                                                                                                                                                                                                                                                                                                                                                  |
| Fibrinogen gamma chain                                                       | P02679  | FGG     | Secreted {ECO:0000269 PubMed:10074346, ECO:0000269 PubMed:19296670, ECO:0000269 PubMed:9628725}.                                                                                                                                                                                                                                                                                                                                                                                                                                                                                                                                                                                                                                                                                                                                                                                                                                                                                                                                                                                                                                                                                                  |
| Erythrocyte band 7 integral membrane protein                                 | P27105  | STOM    | Cell membrane {ECO:0000269 PubMed:9243190}; Peripheral membrane protein {ECO:0000269 PubMed:9243190}; Cytoplasmic side {ECO:0000269 PubMed:9243190}. Cytoplasm, cytoskeleton {ECO:0000269 PubMed:9243190}. Cell membrane {ECO:0000269 PubMed:12130500}; Lipid-anchor {ECO:0000269 PubMed:12130500}; Cytoplasmic side {ECO:0000269 PubMed:12130500}. Membrane raft {ECO:0000269 PubMed:12130500, ECO:0000269 PubMed:23219802}. Melanosome {ECO:0000269 PubMed:12643545, ECO:0000269 PubMed:17081065}. Cytoplasmic vesicle {ECO:0000250 UniProtKB:P54116}. Note=Localizes to juxtannuclear structure probably derived from the Golgi apparatus (PubMed:9243190). Colocalizes with cortical actin microfilaments at small plasma membrane protrusions (PubMed:9243190). Associates with alpha-granular lipid rafts (PubMed:12130500). Translocates from the alpha-granular lipid rafts to the cell membrane on thrombin activation and selectively enriched in released microvesicles (PubMed:12130500). Identified by mass spectrometry in melanosome fractions from stage I to stage IV (PubMed:12643545). {ECO:0000269 PubMed:12130500, ECO:0000269 PubMed:12643545, ECO:0000269 PubMed:9243190}. |
| NADH dehydrogenase [ubiquinone] 1 alpha subcomplex subunit 10, mitochondrial | O95299  | NDUFA10 | Mitochondrion matrix {ECO:0000305 PubMed:12611891}.                                                                                                                                                                                                                                                                                                                                                                                                                                                                                                                                                                                                                                                                                                                                                                                                                                                                                                                                                                                                                                                                                                                                               |
| Blood group Rh(D) polypeptide                                                | Q02161  | RHD     | Cell membrane {ECO:0000269 PubMed:1544931, ECO:0000269 PubMed:3142870}; Multi-pass membrane protein {ECO:0000255}.                                                                                                                                                                                                                                                                                                                                                                                                                                                                                                                                                                                                                                                                                                                                                                                                                                                                                                                                                                                                                                                                                |
| Tropomyosin alpha-3 chain                                                    | P06753  | TPM3    | Cytoplasm, cytoskeleton {ECO:0000305}.                                                                                                                                                                                                                                                                                                                                                                                                                                                                                                                                                                                                                                                                                                                                                                                                                                                                                                                                                                                                                                                                                                                                                            |
| Peroxiredoxin-4                                                              | Q13162  | PRDX4   | Cytoplasm {ECO:0000269 PubMed:18052930, ECO:0000269 PubMed:9388242}. Endoplasmic reticulum {ECO:0000269 PubMed:18052930}. Note=Cotranslationally translocated to and retained within the endoplasmic reticulum. A small fraction of the protein is cytoplasmic. {ECO:0000269 PubMed:18052930}.                                                                                                                                                                                                                                                                                                                                                                                                                                                                                                                                                                                                                                                                                                                                                                                                                                                                                                    |
| Cytochrome b-c1 complex subunit 8                                            | O14949  | UQCQRQ  | Mitochondrion inner membrane.                                                                                                                                                                                                                                                                                                                                                                                                                                                                                                                                                                                                                                                                                                                                                                                                                                                                                                                                                                                                                                                                                                                                                                     |
| Long-chain-fatty-acid--CoA ligase 1                                          | P33121  | ACSL1   | Mitochondrion outer membrane {ECO:0000250}; Single-pass type III membrane protein {ECO:0000250}. Peroxisome membrane {ECO:0000250}; Single-pass type III membrane protein {ECO:0000250}. Microsome membrane {ECO:0000250}; Single-pass type III membrane protein {ECO:0000250}. Endoplasmic reticulum membrane {ECO:0000250}; Single-pass type III membrane protein {ECO:0000250}.                                                                                                                                                                                                                                                                                                                                                                                                                                                                                                                                                                                                                                                                                                                                                                                                                |

**Supplemental Table 1 Page 15. All proteins quantitated in study**

| Protein Name                                                         | Uniprot | Gene   | Subcellular localization                                                                                                                                                                                                                                                                                                                                                                                                                                            |
|----------------------------------------------------------------------|---------|--------|---------------------------------------------------------------------------------------------------------------------------------------------------------------------------------------------------------------------------------------------------------------------------------------------------------------------------------------------------------------------------------------------------------------------------------------------------------------------|
| NADH dehydrogenase [ubiquinone] iron-sulfur protein 3, mitochondrial | O75489  | NDUFS3 | Mitochondrion inner membrane.                                                                                                                                                                                                                                                                                                                                                                                                                                       |
| NADH dehydrogenase [ubiquinone] 1 alpha subcomplex subunit 8         | P51970  | NDUFA8 | Mitochondrion inner membrane {ECO:0000269 PubMed:21310150}; Peripheral membrane protein {ECO:0000269 PubMed:21310150}. Mitochondrion intermembrane space {ECO:0000269 PubMed:21310150}. Mitochondrion {ECO:0000269 PubMed:23676665}.                                                                                                                                                                                                                                |
| Heat shock-related 70 kDa protein 2                                  | P54652  | HSPA2  | Cytoplasm, cytoskeleton, spindle {ECO:0000250 UniProtKB:P17156}. Note=Colocalizes with SHCBP1L at spindle during the meiosis process. {ECO:0000250 UniProtKB:P17156}.                                                                                                                                                                                                                                                                                               |
| Sideroflexin-3                                                       | Q9BWM7  | SFXN3  | Mitochondrion membrane {ECO:0000269 PubMed:30442778, ECO:0000269 Ref.4}; Multi-pass membrane protein {ECO:0000255}.                                                                                                                                                                                                                                                                                                                                                 |
| Malate dehydrogenase, cytoplasmic                                    | P40925  | MDH1   | Cytoplasm.                                                                                                                                                                                                                                                                                                                                                                                                                                                          |
| Myosin-9                                                             | P35579  | MYH9   | Cytoplasm, cytoskeleton {ECO:0000250 UniProtKB:Q8VDD5}. Cytoplasm, cell cortex {ECO:0000250 UniProtKB:Q8VDD5}. Note=Colocalizes with actin filaments at lamellipodia margins and at the leading edge of migrating cells (PubMed:20052411). In retinal pigment epithelial cells, predominantly localized to stress fiber-like structures with some localization to cytoplasmic puncta (PubMed:27331610). {ECO:0000269 PubMed:20052411, ECO:0000269 PubMed:27331610}. |
| Ecto-ADP-ribosyltransferase 3                                        | Q13508  | ART3   | Cell membrane; Lipid-anchor, GPI-anchor.                                                                                                                                                                                                                                                                                                                                                                                                                            |
| Collagen alpha-1(VI) chain                                           | P12109  | COL6A1 | Secreted, extracellular space, extracellular matrix {ECO:0000250}.                                                                                                                                                                                                                                                                                                                                                                                                  |
| Alpha-actinin-2                                                      | P35609  | ACTN2  | Cytoplasm, myofibril, sarcomere, Z line {ECO:0000269 PubMed:11171996, ECO:0000269 PubMed:19932097}. Note=Colocalizes with MYOZ1 and FLNC at the Z-lines of skeletal muscle.                                                                                                                                                                                                                                                                                         |
| Immunoglobulin heavy constant alpha 1                                | P01876  | IGHA1  | Secreted {ECO:0000303 PubMed:20176268, ECO:0000303 PubMed:22158414}. Cell membrane {ECO:0000303 PubMed:20176268, ECO:0000303 PubMed:22158414}.                                                                                                                                                                                                                                                                                                                      |
| Mitochondrial import inner membrane translocase subunit TIM44        | O43615  | TIMM44 | Mitochondrion inner membrane {ECO:0000269 PubMed:10339406}; Peripheral membrane protein {ECO:0000269 PubMed:10339406}; Matrix side {ECO:0000269 PubMed:10339406}. Mitochondrion matrix {ECO:0000269 PubMed:10339406}.                                                                                                                                                                                                                                               |
| Polyribonucleotide nucleotidyltransferase 1, mitochondrial           | Q8TCS8  | PNPT1  | Cytoplasm. Mitochondrion. Mitochondrion intermembrane space; Peripheral membrane protein.                                                                                                                                                                                                                                                                                                                                                                           |
| Cytochrome c oxidase subunit 5A, mitochondrial                       | P20674  | COX5A  | Mitochondrion inner membrane.                                                                                                                                                                                                                                                                                                                                                                                                                                       |
| Collagen alpha-1(IV) chain                                           | P02462  | COL4A1 | Secreted, extracellular space, extracellular matrix, basement membrane {ECO:0000250 UniProtKB:P02463}.                                                                                                                                                                                                                                                                                                                                                              |
| Vesicle-associated membrane protein-associated protein B/C           | O95292  | VAPB   | Endoplasmic reticulum membrane {ECO:0000250}; Single-pass type IV membrane protein {ECO:0000250}. Note=Present in mitochondria-associated membranes that are endoplasmic reticulum membrane regions closely apposed to the outer mitochondrial membrane. {ECO:0000269 PubMed:22131369}.                                                                                                                                                                             |

**Supplemental Table 1 Page 16. All proteins quantitated in study**

| Protein Name                                              | Uniprot | Gene    | Subcellular localization                                                                                                                                                                                                                                                                                                                                                                                                                                                                                                                                                                                                                                                                                    |
|-----------------------------------------------------------|---------|---------|-------------------------------------------------------------------------------------------------------------------------------------------------------------------------------------------------------------------------------------------------------------------------------------------------------------------------------------------------------------------------------------------------------------------------------------------------------------------------------------------------------------------------------------------------------------------------------------------------------------------------------------------------------------------------------------------------------------|
| Basic leucine zipper and W2 domain-containing protein 2   | Q9Y6E2  | BZW2    | 0                                                                                                                                                                                                                                                                                                                                                                                                                                                                                                                                                                                                                                                                                                           |
| 3-oxoacyl-[acyl-carrier-protein] synthase, mitochondrial  | Q9NWU1  | OXSM    | Mitochondrion {ECO:0000269 PubMed:15668256}.                                                                                                                                                                                                                                                                                                                                                                                                                                                                                                                                                                                                                                                                |
| Alpha-1B-glycoprotein                                     | P04217  | A1BG    | Secreted.                                                                                                                                                                                                                                                                                                                                                                                                                                                                                                                                                                                                                                                                                                   |
| Ras-related protein Ral-A                                 | P11233  | RALA    | Cell membrane {ECO:0000269 PubMed:17875936, ECO:0000269 PubMed:18756269, ECO:0000269 PubMed:19306925}; Lipid-anchor {ECO:0000269 PubMed:17875936}; Cytoplasmic side. Cleavage furrow {ECO:0000269 PubMed:18756269}. Midbody, Midbody ring {ECO:0000269 PubMed:16213214}. Note=Predominantly at the cell surface in the absence of LPA. In the presence of LPA, colocalizes with LPAR1 and LPAR2 in endocytic vesicles (PubMed:19306925). May colocalize with CNTRL/centriolin at the midbody ring (PubMed:16213214). However, localization at the midbody at late cytokinesis was not confirmed (PubMed:18756269). {ECO:0000269 PubMed:16213214, ECO:0000269 PubMed:18756269, ECO:0000269 PubMed:19306925}. |
| Serine hydroxymethyltransferase, mitochondrial            | P34897  | SHMT2   | Mitochondrion {ECO:0000269 PubMed:21876188, ECO:0000269 PubMed:24075985}. Mitochondrion matrix, mitochondrion nucleoid {ECO:0000269 PubMed:18063578}. Mitochondrion inner membrane {ECO:0000269 PubMed:21876188}. Cytoplasm {ECO:0000269 PubMed:24075985}. Nucleus {ECO:0000269 PubMed:24075985}. Note=Mainly localizes in the mitochondrion. Also found in the cytoplasm and nucleus as part of the BRISC complex (PubMed:24075985). {ECO:0000269 PubMed:24075985}.                                                                                                                                                                                                                                        |
| Serotransferrin                                           | P02787  | TF      | Secreted.                                                                                                                                                                                                                                                                                                                                                                                                                                                                                                                                                                                                                                                                                                   |
| Titin                                                     | Q8WZ42  | TTN     | Cytoplasm {ECO:0000305 PubMed:16410549}. Nucleus {ECO:0000269 PubMed:16410549}.                                                                                                                                                                                                                                                                                                                                                                                                                                                                                                                                                                                                                             |
| Pyruvate dehydrogenase protein X component, mitochondrial | O00330  | PDHX    | Mitochondrion matrix.                                                                                                                                                                                                                                                                                                                                                                                                                                                                                                                                                                                                                                                                                       |
| ATP-dependent 6-phosphofructokinase, muscle type          | P08237  | PFKM    | Cytoplasm {ECO:0000255 HAMAP-Rule:MF_03184}.                                                                                                                                                                                                                                                                                                                                                                                                                                                                                                                                                                                                                                                                |
| ADP/ATP translocase 2                                     | P05141  | SLC25A5 | Mitochondrion inner membrane; Multi-pass membrane protein.                                                                                                                                                                                                                                                                                                                                                                                                                                                                                                                                                                                                                                                  |
| Annexin A2                                                | P07355  | ANXA2   | Secreted, extracellular space, extracellular matrix, basement membrane {ECO:0000269 PubMed:17081065}. Melanosome {ECO:0000269 PubMed:17081065}. Note=In the lamina beneath the plasma membrane. Identified by mass spectrometry in melanosome fractions from stage I to stage IV. Translocated from the cytoplasm to the cell surface through a Golgi-independent mechanism.                                                                                                                                                                                                                                                                                                                                |
| Mitochondrial fission 1 protein                           | Q9Y3D6  | FIS1    | Mitochondrion outer membrane; Single-pass membrane protein. Peroxisome membrane; Single-pass membrane protein.                                                                                                                                                                                                                                                                                                                                                                                                                                                                                                                                                                                              |
| Biglycan                                                  | P21810  | BGN     | Secreted, extracellular space, extracellular matrix {ECO:0000250}.                                                                                                                                                                                                                                                                                                                                                                                                                                                                                                                                                                                                                                          |
| 28S ribosomal protein S35, mitochondrial                  | P82673  | MRPS35  | Mitochondrion {ECO:0000269 PubMed:25838379}.                                                                                                                                                                                                                                                                                                                                                                                                                                                                                                                                                                                                                                                                |

**Supplemental Table 1 Page 17. All proteins quantitated in study**

| Protein Name                                                | Uniprot | Gene    | Subcellular localization                                                                                                                                                                                                                                                                                                                                                                                                                                                                                                                                                                                                                                                                                                                                                                                                                                                                                                                  |
|-------------------------------------------------------------|---------|---------|-------------------------------------------------------------------------------------------------------------------------------------------------------------------------------------------------------------------------------------------------------------------------------------------------------------------------------------------------------------------------------------------------------------------------------------------------------------------------------------------------------------------------------------------------------------------------------------------------------------------------------------------------------------------------------------------------------------------------------------------------------------------------------------------------------------------------------------------------------------------------------------------------------------------------------------------|
| Hemoglobin subunit beta                                     | P68871  | HBB     | 0                                                                                                                                                                                                                                                                                                                                                                                                                                                                                                                                                                                                                                                                                                                                                                                                                                                                                                                                         |
| Myozenin-2                                                  | Q9NPC6  | MYOZ2   | Cytoplasm, myofibril, sarcomere, Z line {ECO:0000250}. Note=Colocalizes with ACTN1 and PPP3CA at the Z-line of heart and skeletal muscle. {ECO:0000250}.                                                                                                                                                                                                                                                                                                                                                                                                                                                                                                                                                                                                                                                                                                                                                                                  |
| Acyl carrier protein, mitochondrial                         | O14561  | NDUFAB1 | Mitochondrion {ECO:0000269 PubMed:12611891, ECO:0000269 PubMed:28892042}.                                                                                                                                                                                                                                                                                                                                                                                                                                                                                                                                                                                                                                                                                                                                                                                                                                                                 |
| Eukaryotic initiation factor 4A-I                           | P60842  | EIF4A1  | 0                                                                                                                                                                                                                                                                                                                                                                                                                                                                                                                                                                                                                                                                                                                                                                                                                                                                                                                                         |
| Myosin-binding protein C, slow-type                         | Q00872  | MYBPC1  | 0                                                                                                                                                                                                                                                                                                                                                                                                                                                                                                                                                                                                                                                                                                                                                                                                                                                                                                                                         |
| Galectin-1                                                  | P09382  | LGALS1  | Secreted, extracellular space, extracellular matrix {ECO:0000269 PubMed:14617626}.                                                                                                                                                                                                                                                                                                                                                                                                                                                                                                                                                                                                                                                                                                                                                                                                                                                        |
| NADH-cytochrome b5 reductase 1                              | Q9UHQ9  | CYB5R1  | Membrane {ECO:0000305}; Single-pass membrane protein {ECO:0000305}.                                                                                                                                                                                                                                                                                                                                                                                                                                                                                                                                                                                                                                                                                                                                                                                                                                                                       |
| Sodium/potassium-transporting ATPase subunit alpha-1        | P05023  | ATP1A1  | Cell membrane, sarcolemma {ECO:0000269 PubMed:7711835}; Multi-pass membrane protein {ECO:0000255}. Melanosome {ECO:0000269 PubMed:17081065}. Note=Identified by mass spectrometry in melanosome fractions from stage I to stage IV. {ECO:0000269 PubMed:17081065}.                                                                                                                                                                                                                                                                                                                                                                                                                                                                                                                                                                                                                                                                        |
| Peptidyl-prolyl cis-trans isomerase F, mitochondrial        | P30405  | PPIF    | Mitochondrion matrix {ECO:0000269 PubMed:10406942}.                                                                                                                                                                                                                                                                                                                                                                                                                                                                                                                                                                                                                                                                                                                                                                                                                                                                                       |
| Medium-chain specific acyl-CoA dehydrogenase, mitochondrial | P11310  | ACADM   | Mitochondrion matrix.                                                                                                                                                                                                                                                                                                                                                                                                                                                                                                                                                                                                                                                                                                                                                                                                                                                                                                                     |
| Calsequestrin-1                                             | P31415  | CASQ1   | Endoplasmic reticulum {ECO:0000269 PubMed:27185316, ECO:0000269 PubMed:28895244}. Sarcoplasmic reticulum {ECO:0000269 PubMed:27196359}. Sarcoplasmic reticulum lumen {ECO:0000250 UniProtKB:P07221}. Sarcoplasmic reticulum membrane; Peripheral membrane protein; Luminal side {ECO:0000250 UniProtKB:P07221}. Mitochondrion matrix {ECO:0000250 UniProtKB:O09165}. Note=This isoform of calsequestrin occurs in the sarcoplasmic reticulum's terminal cisternae luminal spaces of fast skeletal muscle cells. Preferentially forms linear and round aggregates in the endoplasmic reticulum (ER) of resting cells (PubMed:28895244). In a minority of cells, homogeneously detected in the ER lumen (PubMed:28895244). Colocalizes with STIM1 at endoplasmic reticulum in response to a depletion of intracellular calcium (PubMed:27185316). {ECO:0000250 UniProtKB:P07221, ECO:0000269 PubMed:27185316, ECO:0000269 PubMed:28895244}. |
| O-acetyl-ADP-ribose deacetylase<br>MACROD1                  | Q9BQ69  | MACROD1 | Nucleus {ECO:0000269 PubMed:23474712}. Note=Recruited to DNA lesions, probably via mono-APD-ribosylated proteins. {ECO:0000269 PubMed:23474712}.                                                                                                                                                                                                                                                                                                                                                                                                                                                                                                                                                                                                                                                                                                                                                                                          |
| Tropomodulin-4                                              | Q9NZQ9  | TMOD4   | Cytoplasm, cytoskeleton {ECO:0000269 PubMed:25250574}. Note=In myofibrils with sarcomeric structure, localizes to the pointed end of actin thin filaments (PubMed:25250574). {ECO:0000269 PubMed:25250574}.                                                                                                                                                                                                                                                                                                                                                                                                                                                                                                                                                                                                                                                                                                                               |
| FH1/FH2 domain-containing protein 1                         | Q9Y613  | FHOD1   | Cytoplasm. Cytoplasm, cytoskeleton. Cell projection, bleb. Note=Predominantly cytoplasmic.                                                                                                                                                                                                                                                                                                                                                                                                                                                                                                                                                                                                                                                                                                                                                                                                                                                |

**Supplemental Table 1 Page 18. All proteins quantitated in study**

| Protein Name                                                        | Uniprot | Gene     | Subcellular localization                                                                                                                                                                                                                                                                                                                                                                                                                                                                                                                                                                                             |
|---------------------------------------------------------------------|---------|----------|----------------------------------------------------------------------------------------------------------------------------------------------------------------------------------------------------------------------------------------------------------------------------------------------------------------------------------------------------------------------------------------------------------------------------------------------------------------------------------------------------------------------------------------------------------------------------------------------------------------------|
| Microsomal glutathione S-transferase 3                              | O14880  | MGST3    | Endoplasmic reticulum membrane {ECO:0000305}; Multi-pass membrane protein {ECO:0000305}. Microsome membrane {ECO:0000305}; Multi-pass membrane protein {ECO:0000305}. Microsome membrane {ECO:0000305}; Lipid-anchor {ECO:0000305}. Membrane {ECO:0000269 PubMed:9278457}.                                                                                                                                                                                                                                                                                                                                           |
| Heat shock protein HSP 90-alpha                                     | P07900  | HSP90AA1 | Nucleus {ECO:0000250 UniProtKB:P07901}. Cytoplasm {ECO:0000250 UniProtKB:P07901}. Melanosome {ECO:0000269 PubMed:17081065}. Cell membrane {ECO:0000269 PubMed:11276205}. Note=Identified by mass spectrometry in melanosome fractions from stage I to stage IV.                                                                                                                                                                                                                                                                                                                                                      |
| ATP synthase subunit f, mitochondrial                               | P56134  | ATP5MF   | Mitochondrion. Mitochondrion inner membrane {ECO:0000305}; Single-pass membrane protein {ECO:0000305}.                                                                                                                                                                                                                                                                                                                                                                                                                                                                                                               |
| Protein FAM210A                                                     | Q96ND0  | FAM210A  | Membrane {ECO:0000255, ECO:0000305}; Single-pass membrane protein {ECO:0000255}. Mitochondrion {ECO:0000250 UniProtKB:Q8BGY7}. Cytoplasm {ECO:0000250 UniProtKB:Q8BGY7}.                                                                                                                                                                                                                                                                                                                                                                                                                                             |
| Epoxide hydrolase 1                                                 | P07099  | EPHX1    | Microsome membrane {ECO:0000250 UniProtKB:P07687}; Single-pass type III membrane protein {ECO:0000250 UniProtKB:P07687}. Endoplasmic reticulum membrane {ECO:0000250 UniProtKB:P07687}; Single-pass type III membrane protein {ECO:0000250 UniProtKB:P07687}.                                                                                                                                                                                                                                                                                                                                                        |
| GTP-binding protein SAR1b                                           | Q9Y6B6  | SAR1B    | Endoplasmic reticulum membrane {ECO:0000250}; Peripheral membrane protein {ECO:0000250}. Golgi apparatus, Golgi stack membrane {ECO:0000250}; Peripheral membrane protein {ECO:0000250}. Note=Associated with the endoplasmic reticulum and Golgi stacks, in particular in the juxta-nuclear Golgi region. {ECO:0000250}.                                                                                                                                                                                                                                                                                            |
| Actin, alpha cardiac muscle 1                                       | P68032  | ACTC1    | Cytoplasm, cytoskeleton.                                                                                                                                                                                                                                                                                                                                                                                                                                                                                                                                                                                             |
| Collagen alpha-2(VI) chain                                          | P12110  | COL6A2   | Secreted, extracellular space, extracellular matrix {ECO:0000269 PubMed:8305732}. Membrane {ECO:0000269 PubMed:8305732}; Peripheral membrane protein {ECO:0000269 PubMed:8305732}. Note=Recruited on membranes by CSPG4.                                                                                                                                                                                                                                                                                                                                                                                             |
| Myosin regulatory light chain 12A                                   | P19105  | MYL12A   | 0                                                                                                                                                                                                                                                                                                                                                                                                                                                                                                                                                                                                                    |
| Myosin regulatory light chain 2, ventricular/cardiac muscle isoform | P10916  | MYL2     | Cytoplasm, myofibril, sarcomere, A band {ECO:0000250 UniProtKB:P08733}.                                                                                                                                                                                                                                                                                                                                                                                                                                                                                                                                              |
| Kelch-like protein 41                                               | O60662  | KLHL41   | Cytoplasm {ECO:0000269 PubMed:19424503}. Cytoplasm, cytoskeleton {ECO:0000250 UniProtKB:A2AUC9}. Cell projection, pseudopodium {ECO:0000250 UniProtKB:Q9ER30}. Cell projection, ruffle {ECO:0000250 UniProtKB:Q9ER30}. Cytoplasm, myofibril, sarcomere, M line {ECO:0000250 UniProtKB:A2AUC9}. Sarcoplasmic reticulum membrane {ECO:0000269 PubMed:24268659}. Endoplasmic reticulum membrane {ECO:0000269 PubMed:24268659}. Note=Predominantly cytoplasmic but can colocalize with F-actin at the membrane ruffle-like structures at the tips of transformation-specific pseudopodia. {ECO:0000269 PubMed:19424503}. |
| Collagen alpha-1(III) chain                                         | P02461  | COL3A1   | Secreted, extracellular space, extracellular matrix {ECO:0000255 PROSITE-ProRule:PRU00793}.                                                                                                                                                                                                                                                                                                                                                                                                                                                                                                                          |

**Supplemental Table 1 Page 19. All proteins quantitated in study**

| Protein Name                                                      | Uniprot | Gene     | Subcellular localization                                                                                                                                                                                                                                                                                                                                                                                                                                                     |
|-------------------------------------------------------------------|---------|----------|------------------------------------------------------------------------------------------------------------------------------------------------------------------------------------------------------------------------------------------------------------------------------------------------------------------------------------------------------------------------------------------------------------------------------------------------------------------------------|
| Cytochrome c oxidase subunit 7A-related protein, mitochondrial    | O14548  | COX7A2L  | Mitochondrion inner membrane {ECO:0000250}.                                                                                                                                                                                                                                                                                                                                                                                                                                  |
| 5'-AMP-activated protein kinase subunit gamma-1                   | P54619  | PRKAG1   | 0                                                                                                                                                                                                                                                                                                                                                                                                                                                                            |
| Surfeit locus protein 4                                           | O15260  | SURF4    | Endoplasmic reticulum membrane {ECO:0000269 PubMed:15308636, ECO:0000269 PubMed:18287528}; Multi-pass membrane protein {ECO:0000255}. Endoplasmic reticulum-Golgi intermediate compartment membrane {ECO:0000269 PubMed:18287528}; Multi-pass membrane protein {ECO:0000255}. Golgi apparatus membrane {ECO:0000269 PubMed:18287528}; Multi-pass membrane protein {ECO:0000255}. Note=Cycles between the endoplasmic reticulum and the Golgi. {ECO:0000269 PubMed:18287528}. |
| Mitochondrial-processing peptidase subunit beta                   | O75439  | PMPCB    | Mitochondrion matrix {ECO:0000250}.                                                                                                                                                                                                                                                                                                                                                                                                                                          |
| Enoyl-CoA hydratase domain-containing protein 2, mitochondrial    | Q86YB7  | ECHDC2   | Mitochondrion {ECO:0000305}.                                                                                                                                                                                                                                                                                                                                                                                                                                                 |
| Eukaryotic translation initiation factor 3 subunit F              | O00303  | EIF3F    | Cytoplasm {ECO:0000255 HAMAP-Rule:MF_03005}.                                                                                                                                                                                                                                                                                                                                                                                                                                 |
| Protein NipSnap homolog 2                                         | O75323  | NIPSNAP2 | Cytoplasm {ECO:0000250 UniProtKB:O55126}. Mitochondrion outer membrane {ECO:0000269 PubMed:26387735}.                                                                                                                                                                                                                                                                                                                                                                        |
| Adenylyl cyclase-associated protein 2                             | P40123  | CAP2     | Cell membrane {ECO:0000250}; Peripheral membrane protein {ECO:0000250}.                                                                                                                                                                                                                                                                                                                                                                                                      |
| NADH dehydrogenase [ubiquinone] 1 beta subcomplex subunit 6       | O95139  | NDUFB6   | Mitochondrion inner membrane {ECO:0000305 PubMed:12611891}; Single-pass membrane protein {ECO:0000255}; Matrix side {ECO:0000305}.                                                                                                                                                                                                                                                                                                                                           |
| Collagen alpha-3(VI) chain                                        | P12111  | COL6A3   | Secreted, extracellular space, extracellular matrix {ECO:0000250}.                                                                                                                                                                                                                                                                                                                                                                                                           |
| Heterogeneous nuclear ribonucleoprotein K                         | P61978  | HNRNPK   | Cytoplasm {ECO:0000269 PubMed:1729596}. Nucleus, nucleoplasm {ECO:0000269 PubMed:16360036, ECO:0000269 PubMed:1729596, ECO:0000269 PubMed:18775702, ECO:0000269 PubMed:22721921}. Cell projection, podosome {ECO:0000269 PubMed:22721921}. Note=Recruited to p53/TP53-responsive promoters, in the presence of functional p53/TP53 (PubMed:16360036). In case of ASFV infection, there is a shift in the localization which becomes predominantly nuclear (PubMed:18775702). |
| Troponin C, skeletal muscle                                       | P02585  | TNNC2    | 0                                                                                                                                                                                                                                                                                                                                                                                                                                                                            |
| Solute carrier family 2, facilitated glucose transporter member 1 | P11166  | SLC2A1   | Cell membrane; Multi-pass membrane protein. Melanosome. Note=Localizes primarily at the cell surface. Identified by mass spectrometry in melanosome fractions from stage I to stage IV.                                                                                                                                                                                                                                                                                      |
| Fibrinogen beta chain                                             | P02675  | FGB      | Secreted {ECO:0000269 PubMed:10074346, ECO:0000269 PubMed:19296670, ECO:0000269 PubMed:9628725}.                                                                                                                                                                                                                                                                                                                                                                             |

**Supplemental Table 1 Page 20. All proteins quantitated in study**

| Protein Name                              | Uniprot | Gene    | Subcellular localization                                                                                                                                                                                                                                                                                                                                                                                                                                                                                                                                                                                                                                                                                                                                                                                                                                                                                                                                                                                          |
|-------------------------------------------|---------|---------|-------------------------------------------------------------------------------------------------------------------------------------------------------------------------------------------------------------------------------------------------------------------------------------------------------------------------------------------------------------------------------------------------------------------------------------------------------------------------------------------------------------------------------------------------------------------------------------------------------------------------------------------------------------------------------------------------------------------------------------------------------------------------------------------------------------------------------------------------------------------------------------------------------------------------------------------------------------------------------------------------------------------|
| Ras-related protein Rab-21                | Q9UL25  | RAB21   | Endoplasmic reticulum membrane {ECO:0000269 PubMed:10887961}; Lipid-anchor {ECO:0000305}. Golgi apparatus, trans-Golgi network {ECO:0000269 PubMed:19745841}. Golgi apparatus membrane {ECO:0000305}. Early endosome membrane {ECO:0000269 PubMed:16525121, ECO:0000269 PubMed:25648148}. Cytoplasmic vesicle membrane {ECO:0000269 PubMed:10887961}. Cleavage furrow {ECO:0000269 PubMed:18804435}. Note=Colocalizes with ANKRD27 and VAMP7 in neurites (By similarity). In nonpolarized epithelial Caco-2 cells, found in the endoplasmic reticulum; in polarized cells, observed in vesicles in the apical cytoplasm (PubMed:10887961). During mitosis, in mid-telophase, localized in the ingressing cleavage furrow (PubMed:18804435). In late telophase, detected at the opposite poles of the daughter cells, in vesicles at the base of lamellipodia formed by the separating daughter cells (PubMed:18804435). {ECO:0000250 UniProtKB:P35282, ECO:0000269 PubMed:10887961, ECO:0000269 PubMed:18804435}. |
| ADP/ATP translocase 1                     | P12235  | SLC25A4 | Mitochondrion inner membrane; Multi-pass membrane protein.                                                                                                                                                                                                                                                                                                                                                                                                                                                                                                                                                                                                                                                                                                                                                                                                                                                                                                                                                        |
| Prelamin-A/C                              | P02545  | LMNA    | Nucleus {ECO:0000269 PubMed:15372542}. Nucleus envelope {ECO:0000269 PubMed:29599122}. Nucleus lamina. Nucleus, nucleoplasm. Note=Farnesylation of prelamin-A/C facilitates nuclear envelope targeting and subsequent cleavage by ZMPSTE24/FACE1 to remove the farnesyl group produces mature lamin-A/C, which can then be inserted into the nuclear lamina. EMD is required for proper localization of non-farnesylated prelamin-A/C.; Isoform C: Nucleus speckle {ECO:0000269 PubMed:16061563}.                                                                                                                                                                                                                                                                                                                                                                                                                                                                                                                 |
| FUN14 domain-containing protein 2         | Q9BWH2  | FUNDC2  | 0                                                                                                                                                                                                                                                                                                                                                                                                                                                                                                                                                                                                                                                                                                                                                                                                                                                                                                                                                                                                                 |
| ATP synthase subunit gamma, mitochondrial | P36542  | ATP5F1C | Mitochondrion inner membrane {ECO:0000250 UniProtKB:P05631}; Peripheral membrane protein {ECO:0000250 UniProtKB:P05631}; Matrix side {ECO:0000250 UniProtKB:P05631}.                                                                                                                                                                                                                                                                                                                                                                                                                                                                                                                                                                                                                                                                                                                                                                                                                                              |

**Supplemental Table 1 Page 21. All proteins quantitated in study**

| Protein Name                               | Uniprot | Gene  | Subcellular localization                                                                                                                                                                                                                                                                                                                                                                                                                                                                                                                                                                                                                                                                                                                                                                                                                                                                                                                                                                                                                                                                                                  |
|--------------------------------------------|---------|-------|---------------------------------------------------------------------------------------------------------------------------------------------------------------------------------------------------------------------------------------------------------------------------------------------------------------------------------------------------------------------------------------------------------------------------------------------------------------------------------------------------------------------------------------------------------------------------------------------------------------------------------------------------------------------------------------------------------------------------------------------------------------------------------------------------------------------------------------------------------------------------------------------------------------------------------------------------------------------------------------------------------------------------------------------------------------------------------------------------------------------------|
| Moesin                                     | P26038  | MSN   | Cell membrane {ECO:0000269 PubMed:11728332, ECO:0000269 PubMed:15039356, ECO:0000269 PubMed:18586956, ECO:0000269 PubMed:7884872, ECO:0000269 PubMed:9298994}; Peripheral membrane protein {ECO:0000250 UniProtKB:P26041}; Cytoplasmic side {ECO:0000250 UniProtKB:P26041}. Cytoplasm, cytoskeleton {ECO:0000250 UniProtKB:P26041}. Apical cell membrane {ECO:0000250 UniProtKB:P26041}; Peripheral membrane protein {ECO:0000250 UniProtKB:P26041}; Cytoplasmic side {ECO:0000250 UniProtKB:P26041}. Cell projection, microvillus membrane {ECO:0000250 UniProtKB:P26041}; Peripheral membrane protein {ECO:0000250 UniProtKB:P26041}; Cytoplasmic side {ECO:0000250 UniProtKB:P26041}. Cell projection, microvillus {ECO:0000250 UniProtKB:P26041}. Note=Phosphorylated form is enriched in microvilli-like structures at apical membrane. Increased cell membrane localization of both phosphorylated and non-phosphorylated forms seen after thrombin treatment (By similarity). Localizes at the uropods of T lymphoblasts. {ECO:0000250 UniProtKB:P26041, ECO:0000269 PubMed:18586956, ECO:0000269 PubMed:9298994}. |
| Starch-binding domain-containing protein 1 | O95210  | STBD1 | Preautophagosomal structure membrane {ECO:0000269 PubMed:20810658, ECO:0000305 PubMed:21893048}; Single-pass type III membrane protein {ECO:0000305 PubMed:9794794}. Endoplasmic reticulum membrane {ECO:0000269 PubMed:24837458}; Single-pass type III membrane protein {ECO:0000305 PubMed:9794794}. Cell membrane, sarcolemma, T-tubule {ECO:0000269 PubMed:9794794}. Note=Also detected near the junctional sarcoplasmic reticulum (PubMed:9794794). Concentrates at perinuclear structures (PubMed:21893048). {ECO:0000269 PubMed:21893048, ECO:0000269 PubMed:9794794}.                                                                                                                                                                                                                                                                                                                                                                                                                                                                                                                                             |
| MICOS complex subunit MIC60                | Q16891  | IMMT  | Mitochondrion inner membrane {ECO:0000269 PubMed:25764979, ECO:0000269 PubMed:25997101}; Single-pass membrane protein {ECO:0000255}. Mitochondrion {ECO:0000269 PubMed:25781180}.                                                                                                                                                                                                                                                                                                                                                                                                                                                                                                                                                                                                                                                                                                                                                                                                                                                                                                                                         |
| Coronin-6                                  | Q6QEF8  | CORO6 | 0                                                                                                                                                                                                                                                                                                                                                                                                                                                                                                                                                                                                                                                                                                                                                                                                                                                                                                                                                                                                                                                                                                                         |
| Myozenin-1                                 | Q9NP98  | MYOZ1 | Nucleus. Cell projection, pseudopodium. Note=Localized to the nucleus and pseudopodia of undifferentiated cells and detected throughout the myotubes of differentiated cells. Colocalizes with ACTN2, FLNC and MYOT at the Z-lines of skeletal muscle.                                                                                                                                                                                                                                                                                                                                                                                                                                                                                                                                                                                                                                                                                                                                                                                                                                                                    |
| Vimentin                                   | P08670  | VIM   | Cytoplasm {ECO:0000269 PubMed:21465480, ECO:0000269 PubMed:29496907}. Cytoplasm, cytoskeleton {ECO:0000269 PubMed:29496907}. Nucleus matrix {ECO:0000250 UniProtKB:P31000}.                                                                                                                                                                                                                                                                                                                                                                                                                                                                                                                                                                                                                                                                                                                                                                                                                                                                                                                                               |
| Beta-2-syntrophin                          | Q13425  | SNTB2 | Membrane. Cytoplasmic vesicle, secretory vesicle membrane; Peripheral membrane protein. Cell junction {ECO:0000250}. Cytoplasm, cytoskeleton. Note=Membrane-associated. In muscle, it is exclusively localized at the neuromuscular junction (By similarity). In insulinoma cell line, it is enriched in secretory granules. {ECO:0000250}.                                                                                                                                                                                                                                                                                                                                                                                                                                                                                                                                                                                                                                                                                                                                                                               |

**Supplemental Table 1 Page 22. All proteins quantitated in study**

| Protein Name                                            | Uniprot | Gene      | Subcellular localization                                                                                                                                                                                                                                                                                                                                                                                                                                                                                                                                                                                                                                                                                                                                                            |
|---------------------------------------------------------|---------|-----------|-------------------------------------------------------------------------------------------------------------------------------------------------------------------------------------------------------------------------------------------------------------------------------------------------------------------------------------------------------------------------------------------------------------------------------------------------------------------------------------------------------------------------------------------------------------------------------------------------------------------------------------------------------------------------------------------------------------------------------------------------------------------------------------|
| Junctophilin-1                                          | Q9HDC5  | JPH1      | Cell membrane {ECO:0000250}; Peripheral membrane protein {ECO:0000250}. Endoplasmic reticulum membrane {ECO:0000250}; Single-pass type IV membrane protein {ECO:0000250}. Sarcoplasmic reticulum membrane {ECO:0000250}; Single-pass type IV membrane protein {ECO:0000250}. Note=Localized predominantly on the plasma membrane. The transmembrane domain is anchored in endoplasmic/sarcoplasmic reticulum membrane, while the N-terminal part associates with the plasma membrane. In skeletal muscle cells, it is predominantly localized at the junction of the A and I bands (By similarity). {ECO:0000250}.                                                                                                                                                                  |
| Cofilin-1                                               | P23528  | CFL1      | Nucleus matrix {ECO:0000269 PubMed:15580268}. Cytoplasm, cytoskeleton {ECO:0000269 PubMed:15580268}. Cell projection, ruffle membrane {ECO:0000269 PubMed:15580268}; Peripheral membrane protein {ECO:0000269 PubMed:15580268}; Cytoplasmic side {ECO:0000269 PubMed:15580268}. Cell projection, lamellipodium membrane {ECO:0000269 PubMed:15580268}; Peripheral membrane protein {ECO:0000269 PubMed:15580268}; Cytoplasmic side {ECO:0000269 PubMed:15580268}. Cell projection, lamellipodium {ECO:0000250 UniProtKB:P18760}. Note=Colocalizes with the actin cytoskeleton in membrane ruffles and lamellipodia. Detected at the cleavage furrow and contractile ring during cytokinesis. Almost completely in nucleus in cells exposed to heat shock or 10% dimethyl sulfoxide. |
| Decorin                                                 | P07585  | DCN       | Secreted, extracellular space, extracellular matrix.                                                                                                                                                                                                                                                                                                                                                                                                                                                                                                                                                                                                                                                                                                                                |
| Synaptophysin-like protein 2                            | Q5VXT5  | SYPL2     | Membrane {ECO:0000250}; Multi-pass membrane protein {ECO:0000250}. Note=Triad junction, the junctional complex between the transverse tubule and the sarcoplasmic reticulum. {ECO:0000250}.                                                                                                                                                                                                                                                                                                                                                                                                                                                                                                                                                                                         |
| Voltage-dependent L-type calcium channel subunit beta-1 | Q02641  | CACNB1    | Cell membrane, sarcolemma {ECO:0000305 PubMed:15615847}; Peripheral membrane protein {ECO:0000250 UniProtKB:P19517}; Cytoplasmic side {ECO:0000250 UniProtKB:P19517}. Cell membrane {ECO:0000305 PubMed:1309651}; Peripheral membrane protein {ECO:0000305 PubMed:1309651}.                                                                                                                                                                                                                                                                                                                                                                                                                                                                                                         |
| Collagen alpha-1(I) chain                               | P02452  | COL1A1    | Secreted, extracellular space, extracellular matrix {ECO:0000255 PROSITE-ProRule:PRU00793}.                                                                                                                                                                                                                                                                                                                                                                                                                                                                                                                                                                                                                                                                                         |
| Histone H2A type 1-D                                    | P20671  | HIST1H2AD | Nucleus. Chromosome.                                                                                                                                                                                                                                                                                                                                                                                                                                                                                                                                                                                                                                                                                                                                                                |
| 28S ribosomal protein S31, mitochondrial                | Q92665  | MRPS31    | Mitochondrion {ECO:0000269 PubMed:11279123}.                                                                                                                                                                                                                                                                                                                                                                                                                                                                                                                                                                                                                                                                                                                                        |
| C->U-editing enzyme APOBEC-2                            | Q9Y235  | APOBEC2   | 0                                                                                                                                                                                                                                                                                                                                                                                                                                                                                                                                                                                                                                                                                                                                                                                   |
| Actin, cytoplasmic 1                                    | P60709  | ACTB      | Cytoplasm, cytoskeleton {ECO:0000269 PubMed:11687588, ECO:0000269 PubMed:17289661}. Nucleus {ECO:0000269 PubMed:11687588, ECO:0000269 PubMed:29925947}. Note=Localized in cytoplasmic mRNP granules containing untranslated mRNAs. {ECO:0000269 PubMed:17289661}.                                                                                                                                                                                                                                                                                                                                                                                                                                                                                                                   |
| Glutamine--tRNA ligase                                  | P47897  | QARS      | Cytoplasm, cytosol {ECO:0000269 PubMed:19289464}. Cytoplasm {ECO:0000269 PubMed:10791971, ECO:0000269 PubMed:24656866}.                                                                                                                                                                                                                                                                                                                                                                                                                                                                                                                                                                                                                                                             |
| Myomesin-2                                              | P54296  | MYOM2     | Cytoplasm, myofibril, sarcomere, M line {ECO:0000250}.                                                                                                                                                                                                                                                                                                                                                                                                                                                                                                                                                                                                                                                                                                                              |

**Supplemental Table 1 Page 23. All proteins quantitated in study**

| Protein Name                                                   | Uniprot | Gene     | Subcellular localization                                                                                                                                                                                                                                                                                                                                                                                                                                                                                                                                                                                                                                                                                                                                                                                                                              |
|----------------------------------------------------------------|---------|----------|-------------------------------------------------------------------------------------------------------------------------------------------------------------------------------------------------------------------------------------------------------------------------------------------------------------------------------------------------------------------------------------------------------------------------------------------------------------------------------------------------------------------------------------------------------------------------------------------------------------------------------------------------------------------------------------------------------------------------------------------------------------------------------------------------------------------------------------------------------|
| ATP synthase subunit O, mitochondrial                          | P48047  | ATP5PO   | Mitochondrion {ECO:0000250}. Mitochondrion inner membrane {ECO:0000250}.                                                                                                                                                                                                                                                                                                                                                                                                                                                                                                                                                                                                                                                                                                                                                                              |
| Peroxiredoxin-6                                                | P30041  | PRDX6    | Cytoplasm {ECO:0000269 PubMed:16186110, ECO:0000269 PubMed:19188445, ECO:0000269 PubMed:9497358}. Lysosome {ECO:0000250 UniProtKB:O35244}. Note=Also found in lung secretory organelles (lamellar bodies). {ECO:0000250 UniProtKB:O35244}.                                                                                                                                                                                                                                                                                                                                                                                                                                                                                                                                                                                                            |
| Dual specificity mitogen-activated protein kinase kinase 1     | Q02750  | MAP2K1   | Cytoplasm, cytoskeleton, microtubule organizing center, centrosome {ECO:0000269 PubMed:14737111}. Cytoplasm, cytoskeleton, microtubule organizing center, spindle pole body {ECO:0000269 PubMed:14737111}. Cytoplasm {ECO:0000269 PubMed:10409742, ECO:0000269 PubMed:17101779}. Nucleus {ECO:0000269 PubMed:17101779}. Membrane {ECO:0000269 PubMed:10409742}; Peripheral membrane protein {ECO:0000269 PubMed:10409742}. Note=Localizes at centrosomes during prometaphase, midzone during anaphase and midbody during telophase/cytokinesis (PubMed:14737111). Membrane localization is probably regulated by its interaction with KSR1 (PubMed:10409742). {ECO:0000269 PubMed:10409742, ECO:0000269 PubMed:14737111}.                                                                                                                             |
| Troponin I, slow skeletal muscle                               | P19237  | TNNI1    | 0                                                                                                                                                                                                                                                                                                                                                                                                                                                                                                                                                                                                                                                                                                                                                                                                                                                     |
| Glucose-6-phosphate isomerase                                  | P06744  | GPI      | Cytoplasm {ECO:0000269 PubMed:11437381}. Secreted {ECO:0000269 PubMed:11437381}.                                                                                                                                                                                                                                                                                                                                                                                                                                                                                                                                                                                                                                                                                                                                                                      |
| Hydroxysteroid dehydrogenase-like protein 2                    | Q6YN16  | HSDL2    | Peroxisome {ECO:0000269 PubMed:19703561}.                                                                                                                                                                                                                                                                                                                                                                                                                                                                                                                                                                                                                                                                                                                                                                                                             |
| cAMP-dependent protein kinase type II-alpha regulatory subunit | P13861  | PRKAR2A  | Cytoplasm {ECO:0000269 PubMed:21423175}. Cell membrane {ECO:0000269 PubMed:21423175}. Note=Colocalizes with PJA2 in the cytoplasm and the cell membrane.                                                                                                                                                                                                                                                                                                                                                                                                                                                                                                                                                                                                                                                                                              |
| Troponin I, fast skeletal muscle                               | P48788  | TNNI2    | 0                                                                                                                                                                                                                                                                                                                                                                                                                                                                                                                                                                                                                                                                                                                                                                                                                                                     |
| Thioredoxin-related transmembrane protein 2                    | Q9Y320  | TMX2     | Membrane {ECO:0000305}; Single-pass type I membrane protein {ECO:0000305}.                                                                                                                                                                                                                                                                                                                                                                                                                                                                                                                                                                                                                                                                                                                                                                            |
| Fructose-bisphosphate aldolase C                               | P09972  | ALDOC    | 0                                                                                                                                                                                                                                                                                                                                                                                                                                                                                                                                                                                                                                                                                                                                                                                                                                                     |
| Myosin-8                                                       | P13535  | MYH8     | Cytoplasm, myofibril. Note=Thick filaments of the myofibrils.                                                                                                                                                                                                                                                                                                                                                                                                                                                                                                                                                                                                                                                                                                                                                                                         |
| Fructose-1,6-bisphosphatase isozyme 2                          | O00757  | FBP2     | Cell junction {ECO:0000250}. Cytoplasm. Nucleus. Cytoplasm, myofibril, sarcomere, Z line. Note=In neonatal cardiomyocytes, distributed throughout the cytosol, accumulating in the intercalated disks which occur at the Z line of cardiomyocytes and connect adjacent cells, and also located in the nucleus; dissociates from the Z line following an increase in cytosolic Ca(2+) concentration (By similarity). In muscle precursor cells, localizes predominantly to the nucleus and to a lesser extent to the cytoplasm at the proliferative phase, while mainly localizing to the cytoplasm at the differentiation phase (By similarity). Colocalizes with ALDOA and alpha-actinin on both sides of the Z line of skeletal muscle; dissociates rapidly from the Z line following an increase in cytosolic Ca(2+) concentration. {ECO:0000250}. |
| Mitochondrial coenzyme A transporter SLC25A42                  | Q86VD7  | SLC25A42 | Mitochondrion inner membrane {ECO:0000269 PubMed:19429682}; Multi-pass membrane protein {ECO:0000269 PubMed:19429682}.                                                                                                                                                                                                                                                                                                                                                                                                                                                                                                                                                                                                                                                                                                                                |

**Supplemental Table 1 Page 24. All proteins quantitated in study**

| Protein Name                                                                                             | Uniprot    | Gene    | Subcellular localization                                                                                                                                                                                                                                                                                                         |
|----------------------------------------------------------------------------------------------------------|------------|---------|----------------------------------------------------------------------------------------------------------------------------------------------------------------------------------------------------------------------------------------------------------------------------------------------------------------------------------|
| Mitochondrial import receptor subunit TOM70                                                              | O94826     | TOMM70  | Mitochondrion outer membrane {ECO:0000250}; Single-pass membrane protein {ECO:0000250}.                                                                                                                                                                                                                                          |
| Gelsolin                                                                                                 | P06396     | GSN     | Isoform 2: Cytoplasm, cytoskeleton.; Isoform 1: Secreted.                                                                                                                                                                                                                                                                        |
| Single-stranded DNA-binding protein, mitochondrial                                                       | Q04837     | SSBP1   | Mitochondrion {ECO:0000269 PubMed:18063578}. Mitochondrion matrix, mitochondrion nucleoid {ECO:0000269 PubMed:18063578}.                                                                                                                                                                                                         |
| Carbonic anhydrase 2                                                                                     | P00918     | CA2     | Cytoplasm {ECO:0000269 PubMed:15990874}. Cell membrane {ECO:0000269 PubMed:15990874}. Note=Colocalized with SLC26A6 at the surface of the cell membrane in order to form a bicarbonate transport metabolon. Displaced from the cytosolic surface of the cell membrane by PKC in phorbol myristate acetate (PMA)-induced cells.   |
| Alpha-1-syntrophin                                                                                       | Q13424     | SNTA1   | Cell membrane, sarcolemma {ECO:0000250}; Peripheral membrane protein {ECO:0000250}; Cytoplasmic side {ECO:0000250}. Cell junction {ECO:0000250}. Cytoplasm, cytoskeleton {ECO:0000250}. Note=In skeletal muscle, it localizes at the cytoplasmic side of the sarcolemmal membrane and at neuromuscular junctions. {ECO:0000250}. |
| Hemoglobin subunit delta                                                                                 | P02042     | HBD     | 0                                                                                                                                                                                                                                                                                                                                |
| Protein-L-isoaspartate(D-aspartate) O-methyltransferase                                                  | P22061     | PCMT1   | Cytoplasm.                                                                                                                                                                                                                                                                                                                       |
| Cadherin-13                                                                                              | P55290     | CDH13   | Cell membrane; Lipid-anchor, GPI-anchor.                                                                                                                                                                                                                                                                                         |
| Beta-enolase                                                                                             | P13929     | ENO3    | Cytoplasm. Note=Localized to the Z line. Some colocalization with CKM at M-band (By similarity). {ECO:0000250}.                                                                                                                                                                                                                  |
| ES1 protein homolog, mitochondrial                                                                       | A0A0B4J2D5 | GATD3B  | Mitochondrion {ECO:0000305}.                                                                                                                                                                                                                                                                                                     |
| MICOS complex subunit MIC13                                                                              | Q5XKP0     | MICOS13 | Mitochondrion inner membrane {ECO:0000269 PubMed:25997101}; Single-pass membrane protein {ECO:0000255}. Note=Enriched at crista junctions. {ECO:0000269 PubMed:25997101}.                                                                                                                                                        |
| Mimecan                                                                                                  | P20774     | OGN     | Secreted, extracellular space, extracellular matrix {ECO:0000250}.                                                                                                                                                                                                                                                               |
| Dihydrolipoyllysine-residue acetyltransferase component of pyruvate dehydrogenase complex, mitochondrial | P10515     | DLAT    | Mitochondrion matrix.                                                                                                                                                                                                                                                                                                            |
| 28S ribosomal protein S29, mitochondrial                                                                 | P51398     | DAP3    | Mitochondrion {ECO:0000269 PubMed:11162496, ECO:0000269 PubMed:20563667}.                                                                                                                                                                                                                                                        |
| Protein disulfide-isomerase A6                                                                           | Q15084     | PDIA6   | Endoplasmic reticulum lumen {ECO:0000269 PubMed:15466936}. Cell membrane {ECO:0000269 PubMed:15466936}. Melanosome {ECO:0000269 PubMed:12643545, ECO:0000269 PubMed:17081065}. Note=Identified by mass spectrometry in melanosome fractions from stage I to stage IV (PubMed:12643545). {ECO:0000269 PubMed:12643545}.           |
| Beta-2-glycoprotein 1                                                                                    | P02749     | APOH    | Secreted.                                                                                                                                                                                                                                                                                                                        |

**Supplemental Table 1 Page 25. All proteins quantitated in study**

| Protein Name                                                                   | Uniprot | Gene    | Subcellular localization                                                                                                                                                                                                                                                                                                                                                                                                                                                                                                                 |
|--------------------------------------------------------------------------------|---------|---------|------------------------------------------------------------------------------------------------------------------------------------------------------------------------------------------------------------------------------------------------------------------------------------------------------------------------------------------------------------------------------------------------------------------------------------------------------------------------------------------------------------------------------------------|
| Dolichyl-diphosphooligosaccharide--protein glycosyltransferase 48 kDa subunit  | P39656  | DDOST   | Endoplasmic reticulum membrane {ECO:0000250 UniProtKB:Q29381}; Single-pass type I membrane protein {ECO:0000250 UniProtKB:Q29381}.                                                                                                                                                                                                                                                                                                                                                                                                       |
| Peptidyl-prolyl cis-trans isomerase A                                          | P62937  | PPIA    | Cytoplasm {ECO:0000269 PubMed:16527992}. Secreted {ECO:0000269 PubMed:16527992}. Note=Secretion occurs in response to oxidative stress in vascular smooth muscle through a vesicular secretory pathway that involves actin remodeling and myosin II activation, and mediates ERK1/2 activation.                                                                                                                                                                                                                                          |
| Sarcoplasmic/endoplasmic reticulum calcium ATPase 1                            | O14983  | ATP2A1  | Endoplasmic reticulum membrane {ECO:0000250 UniProtKB:P04191}; Multi-pass membrane protein {ECO:0000250 UniProtKB:P04191}. Sarcoplasmic reticulum membrane {ECO:0000250 UniProtKB:P04191}; Multi-pass membrane protein {ECO:0000250 UniProtKB:P04191}.                                                                                                                                                                                                                                                                                   |
| Vitronectin                                                                    | P04004  | VTN     | Secreted, extracellular space.                                                                                                                                                                                                                                                                                                                                                                                                                                                                                                           |
| Pyruvate dehydrogenase E1 component subunit alpha, somatic form, mitochondrial | P08559  | PDHA1   | Mitochondrion matrix.                                                                                                                                                                                                                                                                                                                                                                                                                                                                                                                    |
| Synaptopodin 2-like protein                                                    | Q9H987  | SYNPO2L | Cytoplasm, cytoskeleton {ECO:0000250}.                                                                                                                                                                                                                                                                                                                                                                                                                                                                                                   |
| DnaJ homolog subfamily A member 3, mitochondrial                               | Q96EY1  | DNAJA3  | Mitochondrion matrix. Cytoplasm, cytosol {ECO:0000250}. Cell junction, synapse, postsynaptic cell membrane {ECO:0000250}; Peripheral membrane protein {ECO:0000250}. Note=Recruited to the postsynaptic cell membrane of the neuromuscular junction through interaction with MUSK. {ECO:0000250}.                                                                                                                                                                                                                                        |
| Transmembrane protein 14C                                                      | Q9P0S9  | TMEM14C | Mitochondrion membrane {ECO:0000250}; Multi-pass membrane protein {ECO:0000250}.                                                                                                                                                                                                                                                                                                                                                                                                                                                         |
| Cytochrome b-c1 complex subunit Rieske, mitochondrial                          | P47985  | UQCRFS1 | Mitochondrion inner membrane {ECO:0000250 UniProtKB:Q5ZLR5}; Single-pass membrane protein {ECO:0000250 UniProtKB:Q5ZLR5}.                                                                                                                                                                                                                                                                                                                                                                                                                |
| Tropomyosin alpha-1 chain                                                      | P09493  | TPM1    | Cytoplasm, cytoskeleton {ECO:0000250 UniProtKB:P04692}. Note=Associates with F-actin stress fibers. {ECO:0000250 UniProtKB:P04692}.                                                                                                                                                                                                                                                                                                                                                                                                      |
| Cysteine and glycine-rich protein 3                                            | P50461  | CSRP3   | Nucleus {ECO:0000250 UniProtKB:P50463}. Cytoplasm {ECO:0000269 PubMed:18505755}. Cytoplasm, cytoskeleton {ECO:0000305}. Cytoplasm, myofibril, sarcomere, Z line {ECO:0000269 PubMed:24860983}. Cytoplasm, myofibril, sarcomere {ECO:0000269 PubMed:24934443}. Note=Nucleocytoplasmic shuttling protein. Mainly cytoplasmic. In the Z line, found associated with GLRX3 (By similarity). {ECO:0000250 UniProtKB:P50462, ECO:0000250 UniProtKB:P50463}.; Isoform 2: Cytoplasm, myofibril, sarcomere, Z line {ECO:0000269 PubMed:24860983}. |
| Ras-related protein Rap-1b                                                     | P61224  | RAP1B   | Cell membrane. Cytoplasm, cytosol. Cell junction. Note=May shuttle between plasma membrane and cytosol. Presence of KRIT1 and CDH5 is required for its localization to the cell junction.                                                                                                                                                                                                                                                                                                                                                |
| Cytochrome b-c1 complex subunit 6, mitochondrial                               | P07919  | UQCRH   | Mitochondrion inner membrane {ECO:0000250 UniProtKB:P00127}.                                                                                                                                                                                                                                                                                                                                                                                                                                                                             |

**Supplemental Table 1 Page 26. All proteins quantitated in study**

| Protein Name                                                    | Uniprot | Gene   | Subcellular localization                                                                                                                                                                                                                                                                                                                                                                                                                                                                                                                                                                                                                                                                                                  |
|-----------------------------------------------------------------|---------|--------|---------------------------------------------------------------------------------------------------------------------------------------------------------------------------------------------------------------------------------------------------------------------------------------------------------------------------------------------------------------------------------------------------------------------------------------------------------------------------------------------------------------------------------------------------------------------------------------------------------------------------------------------------------------------------------------------------------------------------|
| COP9 signalosome complex subunit 3                              | Q9UN52  | COPS3  | Cytoplasm {ECO:0000269 PubMed:9535219}. Nucleus {ECO:0000269 PubMed:9535219}.                                                                                                                                                                                                                                                                                                                                                                                                                                                                                                                                                                                                                                             |
| Glycogen [starch] synthase, muscle                              | P13807  | GYS1   | 0                                                                                                                                                                                                                                                                                                                                                                                                                                                                                                                                                                                                                                                                                                                         |
| Catalase                                                        | P04040  | CAT    | Peroxisome.                                                                                                                                                                                                                                                                                                                                                                                                                                                                                                                                                                                                                                                                                                               |
| Vesicle-associated membrane protein-associated protein A        | Q9P0L0  | VAPA   | Endoplasmic reticulum membrane {ECO:0000269 PubMed:10523508, ECO:0000269 PubMed:16143324, ECO:0000269 PubMed:19289470, ECO:0000269 PubMed:25447204}; Single-pass type IV membrane protein {ECO:0000269 PubMed:10523508, ECO:0000269 PubMed:19289470}. Cell membrane {ECO:0000269 PubMed:25447204}; Single-pass type IV membrane protein {ECO:0000305}. Cell junction, tight junction {ECO:0000269 PubMed:10523508}. Nucleus membrane {ECO:0000250 UniProtKB:Q9Z270}. Note=Present in the plasma membrane and in intracellular vesicles, together with SNARE proteins. May also associate with the cytoskeleton. Colocalizes with OCLN at the tight junction in polarized epithelial cells. {ECO:0000269 PubMed:10523508}. |
| ATP synthase subunit d, mitochondrial                           | O75947  | ATP5PD | Mitochondrion. Mitochondrion inner membrane.                                                                                                                                                                                                                                                                                                                                                                                                                                                                                                                                                                                                                                                                              |
| Thioredoxin-related transmembrane protein 1                     | Q9H3N1  | TMX1   | Membrane {ECO:0000305}; Single-pass type I membrane protein {ECO:0000305}. Endoplasmic reticulum membrane {ECO:0000305}; Single-pass type I membrane protein {ECO:0000305}. Note=Predominantly found in the endoplasmic reticulum. {ECO:0000269 PubMed:11152479}.                                                                                                                                                                                                                                                                                                                                                                                                                                                         |
| 14-3-3 protein epsilon                                          | P62258  | YWHAE  | Nucleus {ECO:0000269 PubMed:12917326}. Cytoplasm {ECO:0000269 PubMed:12917326}. Melanosome {ECO:0000269 PubMed:12042314, ECO:0000269 PubMed:17081065}. Note=Identified by mass spectrometry in melanosome fractions from stage I to stage IV. {ECO:0000269 PubMed:12042314, ECO:0000269 PubMed:17081065}.                                                                                                                                                                                                                                                                                                                                                                                                                 |
| Cathepsin D                                                     | P07339  | CTSD   | Lysosome. Melanosome. Secreted, extracellular space. Note=Identified by mass spectrometry in melanosome fractions from stage I to stage IV. In aortic samples, detected as an extracellular protein loosely bound to the matrix (PubMed:20551380). {ECO:0000269 PubMed:20551380}.                                                                                                                                                                                                                                                                                                                                                                                                                                         |
| Myosin-3                                                        | P11055  | MYH3   | Cytoplasm, myofibril. Note=Thick filaments of the myofibrils.                                                                                                                                                                                                                                                                                                                                                                                                                                                                                                                                                                                                                                                             |
| Succinate--CoA ligase [ADP-forming] subunit beta, mitochondrial | Q9P2R7  | SUCLA2 | Mitochondrion {ECO:0000255 HAMAP-Rule:MF_03220, ECO:0000269 PubMed:15877282, ECO:0000269 PubMed:17287286, ECO:0000269 PubMed:25944712}.                                                                                                                                                                                                                                                                                                                                                                                                                                                                                                                                                                                   |
| Exportin-2                                                      | P55060  | CSE1L  | Cytoplasm {ECO:0000269 PubMed:9323134}. Nucleus {ECO:0000269 PubMed:9323134}. Note=Shuttles between the nucleus and the cytoplasm. {ECO:0000269 PubMed:9323134}.                                                                                                                                                                                                                                                                                                                                                                                                                                                                                                                                                          |

**Supplemental Table 1 Page 27. All proteins quantitated in study**

| Protein Name                                                                | Uniprot | Gene   | Subcellular localization                                                                                                                                                                                                                                                                                                                                                                                                                                                                                                                                                                                                                                                                                                                                                                                              |
|-----------------------------------------------------------------------------|---------|--------|-----------------------------------------------------------------------------------------------------------------------------------------------------------------------------------------------------------------------------------------------------------------------------------------------------------------------------------------------------------------------------------------------------------------------------------------------------------------------------------------------------------------------------------------------------------------------------------------------------------------------------------------------------------------------------------------------------------------------------------------------------------------------------------------------------------------------|
| Clathrin heavy chain 1                                                      | Q00610  | CLTC   | Cytoplasmic vesicle membrane {ECO:0000269 PubMed:17081065}; Peripheral membrane protein {ECO:0000269 PubMed:17081065}; Cytoplasmic side {ECO:0000269 PubMed:17081065}. Membrane, coated pit {ECO:0000269 PubMed:17081065}; Peripheral membrane protein {ECO:0000269 PubMed:17081065}; Cytoplasmic side {ECO:0000269 PubMed:17081065}. Melanosome {ECO:0000269 PubMed:17081065}. Cytoplasm, cytoskeleton, spindle {ECO:0000269 PubMed:15858577, ECO:0000269 PubMed:16968737, ECO:0000269 PubMed:23918938}. Note=Cytoplasmic face of coated pits and vesicles. Identified by mass spectrometry in melanosome fractions from stage I to stage IV. In complex with TACC3 and CKAP5 (forming the TACC3/ch-TOG/clathrin complex) localized to inter-microtubule bridges in mitotic spindles. {ECO:0000269 PubMed:25596274}. |
| [Pyruvate dehydrogenase [acetyl-transferring]]-phosphatase 1, mitochondrial | Q9P0J1  | PDP1   | Mitochondrion matrix {ECO:0000250}.                                                                                                                                                                                                                                                                                                                                                                                                                                                                                                                                                                                                                                                                                                                                                                                   |
| General vesicular transport factor p115                                     | O60763  | USO1   | Cytoplasm, cytosol {ECO:0000269 PubMed:19454686, ECO:0000269 PubMed:9478999}. Golgi apparatus membrane {ECO:0000269 PubMed:19454686, ECO:0000269 PubMed:9478999}; Peripheral membrane protein {ECO:0000269 PubMed:19454686, ECO:0000269 PubMed:9478999}. Note=Recycles between the cytosol and the Golgi apparatus during interphase. During interphase, the phosphorylated form is found exclusively in cytosol; the unphosphorylated form is associated with Golgi apparatus membranes. {ECO:0000269 PubMed:19454686, ECO:0000269 PubMed:9478999}.                                                                                                                                                                                                                                                                  |
| Ryanodine receptor 1                                                        | P21817  | RYR1   | Sarcoplasmic reticulum membrane {ECO:0000269 PubMed:7556644}; Multi-pass membrane protein {ECO:0000305}. Sarcoplasmic reticulum {ECO:0000250 UniProtKB:P11716}. Note=The number of predicted transmembrane domains varies between orthologs, but the 3D-structures show the presence of six transmembrane regions. Both N-terminus and C-terminus are cytoplasmic. {ECO:0000250 UniProtKB:P11716}.                                                                                                                                                                                                                                                                                                                                                                                                                    |
| Importin-5                                                                  | O00410  | IPO5   | Cytoplasm. Nucleus. Nucleus, nucleolus. Note=Nucleus; nuclear rim. Found particularly in the nuclear rim and nucleolus.                                                                                                                                                                                                                                                                                                                                                                                                                                                                                                                                                                                                                                                                                               |
| Tubulin alpha-1B chain                                                      | P68363  | TUBA1B | Cytoplasm, cytoskeleton.                                                                                                                                                                                                                                                                                                                                                                                                                                                                                                                                                                                                                                                                                                                                                                                              |
| Cytochrome c oxidase subunit 7A2, mitochondrial                             | P14406  | COX7A2 | Mitochondrion inner membrane.                                                                                                                                                                                                                                                                                                                                                                                                                                                                                                                                                                                                                                                                                                                                                                                         |
| Ras-related protein Rab-18                                                  | Q9NP72  | RAB18  | Cell membrane {ECO:0000305}; Lipid-anchor {ECO:0000305}; Cytoplasmic side {ECO:0000305}.                                                                                                                                                                                                                                                                                                                                                                                                                                                                                                                                                                                                                                                                                                                              |
| Methionine aminopeptidase 2                                                 | P50579  | METAP2 | Cytoplasm {ECO:0000255 HAMAP-Rule:MF_03175, ECO:0000269 PubMed:21537465}. Note=About 30% of expressed METAP2 associates with polysomes.                                                                                                                                                                                                                                                                                                                                                                                                                                                                                                                                                                                                                                                                               |
| Tropomyosin beta chain                                                      | P07951  | TPM2   | Cytoplasm, cytoskeleton {ECO:0000250 UniProtKB:P58775}. Note=Associates with F-actin stress fibers. {ECO:0000250 UniProtKB:P58775}.                                                                                                                                                                                                                                                                                                                                                                                                                                                                                                                                                                                                                                                                                   |
| Cullin-associated NEDD8-dissociated protein 2                               | O75155  | CAND2  | Nucleus {ECO:0000250}.                                                                                                                                                                                                                                                                                                                                                                                                                                                                                                                                                                                                                                                                                                                                                                                                |

**Supplemental Table 1 Page 28. All proteins quantitated in study**

| Protein Name                                                      | Uniprot | Gene     | Subcellular localization                                                                                                                                                                                                                                                                                                                                                                                                              |
|-------------------------------------------------------------------|---------|----------|---------------------------------------------------------------------------------------------------------------------------------------------------------------------------------------------------------------------------------------------------------------------------------------------------------------------------------------------------------------------------------------------------------------------------------------|
| Bcl-2-like protein 13                                             | Q9B XK5 | BCL2L13  | Isoform 2: Mitochondrion membrane {ECO:0000305}; Single-pass membrane protein {ECO:0000305}. Nucleus {ECO:0000305}.; Isoform 1: Nucleus {ECO:0000305}.                                                                                                                                                                                                                                                                                |
| Transmembrane protein 43                                          | Q9B TV4 | TMEM43   | Endoplasmic reticulum {ECO:0000250}. Nucleus inner membrane; Multi-pass membrane protein. Note=Retained in the inner nuclear membrane through interaction with EMD and A- and B-lamins. The N- and C-termini are oriented towards the nucleoplasm. The majority of the hydrophilic domain resides in the endoplasmic reticulum lumen (By similarity). {ECO:0000250}.                                                                  |
| Mitochondrial carnitine/acylcarnitine carrier protein             | O43772  | SLC25A20 | Mitochondrion inner membrane; Multi-pass membrane protein.                                                                                                                                                                                                                                                                                                                                                                            |
| Phosphatidylglycerophosphatase and protein-tyrosine phosphatase 1 | Q8WUK0  | PTPMT1   | Mitochondrion inner membrane {ECO:0000250 UniProtKB:P0C089}; Peripheral membrane protein {ECO:0000250 UniProtKB:P0C089}; Matrix side {ECO:0000250 UniProtKB:P0C089}.                                                                                                                                                                                                                                                                  |
| GTP:AMP phosphotransferase AK3, mitochondrial                     | Q9UIJ7  | AK3      | Mitochondrion matrix {ECO:0000255 HAMAP-Rule:MF_03169, ECO:0000269 PubMed:11485571}.                                                                                                                                                                                                                                                                                                                                                  |
| Smoothelin-like protein 1                                         | A8MU46  | SMTNL1   | Cytoplasm, myofibril {ECO:0000269 PubMed:18310078}. Cytoplasm, myofibril, sarcomere, I band {ECO:0000250}. Cytoplasm, myofibril, sarcomere, M line {ECO:0000250}. Nucleus {ECO:0000250}. Note=Colocalizes with MYH2. In its unphosphorylated state, localizes to the cytoplasm (By similarity). Phosphorylation at Ser-301 promotes translocation to the nucleus (By similarity). {ECO:0000250}.                                      |
| Inositol monophosphatase 2                                        | O14732  | IMPA2    | 0                                                                                                                                                                                                                                                                                                                                                                                                                                     |
| Ras-related protein R-Ras2                                        | P62070  | RRAS2    | Cell membrane {ECO:0000250}; Lipid-anchor {ECO:0000250}; Cytoplasmic side {ECO:0000250}. Note=Inner surface of plasma membrane possibly with attachment requiring acylation of the C-terminal cysteine (By similarity with RAS).                                                                                                                                                                                                      |
| Myosin light chain kinase 2, skeletal/cardiac muscle              | Q9H1R3  | MYLK2    | Cytoplasm. Note=Colocalizes with phosphorylated myosin light chain (RLCP) at filaments of the myofibrils.                                                                                                                                                                                                                                                                                                                             |
| Myomesin-3                                                        | Q5VTT5  | MYOM3    | Cytoplasm, myofibril, sarcomere, M line {ECO:0000250}.                                                                                                                                                                                                                                                                                                                                                                                |
| ADP-ribosylation factor 1                                         | P84077  | ARF1     | Golgi apparatus {ECO:0000269 PubMed:17555535}. Cytoplasm, perinuclear region {ECO:0000269 PubMed:17555535}. Cell junction, synapse, synaptosome {ECO:0000250}. Cell junction, synapse, postsynaptic cell membrane, postsynaptic density {ECO:0000250}. Membrane {ECO:0000305}; Lipid-anchor {ECO:0000305}. Golgi apparatus, trans-Golgi network membrane {ECO:0000250 UniProtKB:P84078}; Lipid-anchor {ECO:0000250 UniProtKB:P84078}. |
| LIM and cysteine-rich domains protein 1                           | Q9NZU5  | LMCD1    | Cytoplasm {ECO:0000250}. Nucleus {ECO:0000250}. Note=May shuttle between the cytoplasm and the nucleus. {ECO:0000250}.                                                                                                                                                                                                                                                                                                                |
| Myosin-binding protein C, fast-type                               | Q14324  | MYBPC2   | 0                                                                                                                                                                                                                                                                                                                                                                                                                                     |
| Alpha-1-antitrypsin                                               | P01009  | SERPINA1 | Secreted. Endoplasmic reticulum. Note=The S and Z allele are not secreted effectively and accumulate intracellularly in the endoplasmic reticulum.; Short peptide from AAT: Secreted, extracellular space, extracellular matrix.                                                                                                                                                                                                      |
| Elongation factor 1-alpha 2                                       | Q05639  | EEF1A2   | Nucleus {ECO:0000250}.                                                                                                                                                                                                                                                                                                                                                                                                                |

**Supplemental Table 1 Page 29. All proteins quantitated in study**

| Protein Name                                                    | Uniprot | Gene                                                                                                                                                                             | Subcellular localization                                                                                                                                                                                                                                                                                                                                                                                                                                                                                                                                                                                          |
|-----------------------------------------------------------------|---------|----------------------------------------------------------------------------------------------------------------------------------------------------------------------------------|-------------------------------------------------------------------------------------------------------------------------------------------------------------------------------------------------------------------------------------------------------------------------------------------------------------------------------------------------------------------------------------------------------------------------------------------------------------------------------------------------------------------------------------------------------------------------------------------------------------------|
| Delta-1-pyrroline-5-carboxylate dehydrogenase, mitochondrial    | P30038  | ALDH4A1                                                                                                                                                                          | Mitochondrion matrix.                                                                                                                                                                                                                                                                                                                                                                                                                                                                                                                                                                                             |
| Prohibitin-2                                                    | Q99623  | PHB2                                                                                                                                                                             | Mitochondrion inner membrane {ECO:0000269 PubMed:20959514}. Cytoplasm {ECO:0000269 PubMed:19496786}. Nucleus {ECO:0000269 PubMed:19496786, ECO:0000269 PubMed:20959514}.                                                                                                                                                                                                                                                                                                                                                                                                                                          |
| 39S ribosomal protein L41, mitochondrial                        | Q8IXM3  | MRPL41                                                                                                                                                                           | Mitochondrion {ECO:0000269 PubMed:16024796, ECO:0000269 PubMed:25278503, ECO:0000269 PubMed:25838379, ECO:0000269 PubMed:28892042}.                                                                                                                                                                                                                                                                                                                                                                                                                                                                               |
| Pyruvate dehydrogenase E1 component subunit beta, mitochondrial | P11177  | PDHB                                                                                                                                                                             | Mitochondrion matrix.                                                                                                                                                                                                                                                                                                                                                                                                                                                                                                                                                                                             |
| Myosin-1                                                        | P12882  | MYH1                                                                                                                                                                             | Cytoplasm, myofibril. Note=Thick filaments of the myofibrils.                                                                                                                                                                                                                                                                                                                                                                                                                                                                                                                                                     |
| NADH dehydrogenase [ubiquinone] 1 beta subcomplex subunit 9     | Q9Y6M9  | NDUFB9                                                                                                                                                                           | Mitochondrion inner membrane {ECO:0000305 PubMed:12611891}; Peripheral membrane protein {ECO:0000305}; Matrix side {ECO:0000305}.                                                                                                                                                                                                                                                                                                                                                                                                                                                                                 |
| Histone H4                                                      | P62805  | HIST1H4A;<br>HIST1H4B;<br>HIST1H4C;<br>HIST1H4D;<br>HIST1H4E;<br>HIST1H4F;<br>HIST1H4H;<br>HIST1H4I;<br>HIST1H4J;<br>HIST1H4K;<br>HIST1H4L;<br>HIST2H4A;<br>HIST2H4B;<br>HIST4H4 | Nucleus. Chromosome.                                                                                                                                                                                                                                                                                                                                                                                                                                                                                                                                                                                              |
| 28S ribosomal protein S27, mitochondrial                        | Q92552  | MRPS27                                                                                                                                                                           | Cytoplasm {ECO:0000269 PubMed:28714366}. Mitochondrion {ECO:0000269 PubMed:22841715, ECO:0000269 PubMed:25838379}.                                                                                                                                                                                                                                                                                                                                                                                                                                                                                                |
| Lysosome-associated membrane glycoprotein 1                     | P11279  | LAMP1                                                                                                                                                                            | Cell membrane {ECO:0000250 UniProtKB:P05300}; Single-pass type I membrane protein {ECO:0000255}. Endosome membrane; Single-pass type I membrane protein {ECO:0000255}. Lysosome membrane {ECO:0000269 PubMed:16176980, ECO:0000269 PubMed:17897319}; Single-pass type I membrane protein {ECO:0000255}. Late endosome {ECO:0000269 PubMed:16176980}. Note=This protein shuttles between lysosomes, endosomes, and the plasma membrane (By similarity). Colocalizes with OSBPL1A at the late endosome (PubMed:16176980). {ECO:0000250 UniProtKB:P05300, ECO:0000269 PubMed:16176980, ECO:0000269 PubMed:17897319}. |

**Supplemental Table 1 Page 30. All proteins quantitated in study**

| Protein Name                                                     | Uniprot | Gene      | Subcellular localization                                                                                                                                                                                                                                                                                                                                                                                                                                                                                                                                                                                                                                                                                                                                                                                                                                                                                                                                                                                                   |
|------------------------------------------------------------------|---------|-----------|----------------------------------------------------------------------------------------------------------------------------------------------------------------------------------------------------------------------------------------------------------------------------------------------------------------------------------------------------------------------------------------------------------------------------------------------------------------------------------------------------------------------------------------------------------------------------------------------------------------------------------------------------------------------------------------------------------------------------------------------------------------------------------------------------------------------------------------------------------------------------------------------------------------------------------------------------------------------------------------------------------------------------|
| Dynamin-1-like protein                                           | O00429  | DNM1L     | Cytoplasm, cytosol. Golgi apparatus. Endomembrane system; Peripheral membrane protein. Mitochondrion outer membrane {ECO:0000269 PubMed:26122121, ECO:0000269 PubMed:27145208, ECO:0000269 PubMed:28969390}; Peripheral membrane protein. Peroxisome. Membrane, clathrin-coated pit {ECO:0000250}. Cytoplasmic vesicle, secretory vesicle, synaptic vesicle membrane {ECO:0000250}. Note=Mainly cytosolic. Translocated to the mitochondrial membrane through O-GlcNAcylation and interaction with FIS1. Recruited to the mitochondrial outer membrane by interaction with MIEF1. Colocalized with MARCH5 at mitochondrial membrane. Localizes to mitochondria at sites of division. Localizes to mitochondria following necrosis induction. Associated with peroxisomal membranes, partly recruited there by PEX11B. May also be associated with endoplasmic reticulum tubules and cytoplasmic vesicles and found to be perinuclear. In some cell types, localizes to the Golgi complex. Binds to phospholipid membranes. |
| Histone H2B type 1-B                                             | P33778  | HIST1H2BB | Nucleus. Chromosome.                                                                                                                                                                                                                                                                                                                                                                                                                                                                                                                                                                                                                                                                                                                                                                                                                                                                                                                                                                                                       |
| Putative transferase CAF17, mitochondrial                        | Q5T440  | IBA57     | Mitochondrion {ECO:0000269 PubMed:22323289, ECO:0000269 PubMed:23462291}.                                                                                                                                                                                                                                                                                                                                                                                                                                                                                                                                                                                                                                                                                                                                                                                                                                                                                                                                                  |
| Aspartyl/asparaginyl beta-hydroxylase                            | Q12797  | ASPH      | Isoform 1: Endoplasmic reticulum membrane; Single-pass type II membrane protein {ECO:0000250 UniProtKB:Q28056}.; Isoform 4: Sarcoplasmic reticulum membrane; Single-pass type II membrane protein {ECO:0000305 PubMed:15485681}.; Isoform 8: Endoplasmic reticulum membrane; Single-pass type II membrane protein {ECO:0000269 PubMed:22586105}.                                                                                                                                                                                                                                                                                                                                                                                                                                                                                                                                                                                                                                                                           |
| Myomesin-1                                                       | P52179  | MYOM1     | Cytoplasm, myofibril, sarcomere, M line {ECO:0000250}.                                                                                                                                                                                                                                                                                                                                                                                                                                                                                                                                                                                                                                                                                                                                                                                                                                                                                                                                                                     |
| ADP/ATP translocase 3                                            | P12236  | SLC25A6   | Mitochondrion inner membrane; Multi-pass membrane protein. Note=The complex formed with ARL2BP, ARL2 and SLC25A6 is expressed in mitochondria. {ECO:0000250}.                                                                                                                                                                                                                                                                                                                                                                                                                                                                                                                                                                                                                                                                                                                                                                                                                                                              |
| ATPase ASNA1                                                     | O43681  | ASNA1     | Cytoplasm. Endoplasmic reticulum. Nucleus, nucleolus.                                                                                                                                                                                                                                                                                                                                                                                                                                                                                                                                                                                                                                                                                                                                                                                                                                                                                                                                                                      |
| Guanine nucleotide-binding protein G(I)/G(S)/G(T) subunit beta-2 | P62879  | GNB2      | Cytoplasm, perinuclear region {ECO:0000269 PubMed:16498633}.                                                                                                                                                                                                                                                                                                                                                                                                                                                                                                                                                                                                                                                                                                                                                                                                                                                                                                                                                               |
| AMP deaminase 1                                                  | P23109  | AMPD1     | 0                                                                                                                                                                                                                                                                                                                                                                                                                                                                                                                                                                                                                                                                                                                                                                                                                                                                                                                                                                                                                          |
| Peroxisomal multifunctional enzyme type 2                        | P51659  | HSD17B4   | Peroxisome.                                                                                                                                                                                                                                                                                                                                                                                                                                                                                                                                                                                                                                                                                                                                                                                                                                                                                                                                                                                                                |
| Poly(rC)-binding protein 1                                       | Q15365  | PCBP1     | Nucleus. Cytoplasm. Note=Loosely bound in the nucleus. May shuttle between the nucleus and the cytoplasm.                                                                                                                                                                                                                                                                                                                                                                                                                                                                                                                                                                                                                                                                                                                                                                                                                                                                                                                  |
| Alpha-amino adipic semialdehyde dehydrogenase                    | P49419  | ALDH7A1   | Cytoplasm, cytosol {ECO:0000269 PubMed:20207735}. Nucleus {ECO:0000269 PubMed:20207735}.; Isoform 1: Mitochondrion {ECO:0000269 PubMed:20207735}.                                                                                                                                                                                                                                                                                                                                                                                                                                                                                                                                                                                                                                                                                                                                                                                                                                                                          |
| UTP--glucose-1-phosphate uridylyltransferase                     | Q16851  | UGP2      | Cytoplasm {ECO:0000269 PubMed:8354390}.                                                                                                                                                                                                                                                                                                                                                                                                                                                                                                                                                                                                                                                                                                                                                                                                                                                                                                                                                                                    |

**Supplemental Table 1 Page 31. All proteins quantitated in study**

| Protein Name                                                      | Uniprot | Gene   | Subcellular localization                                                                                                                                                                                                                                                                                                                                                                                                                                                                                                                                                                                                                                                                                                                                                                                                                                                             |
|-------------------------------------------------------------------|---------|--------|--------------------------------------------------------------------------------------------------------------------------------------------------------------------------------------------------------------------------------------------------------------------------------------------------------------------------------------------------------------------------------------------------------------------------------------------------------------------------------------------------------------------------------------------------------------------------------------------------------------------------------------------------------------------------------------------------------------------------------------------------------------------------------------------------------------------------------------------------------------------------------------|
| Protein disulfide-isomerase                                       | P07237  | P4HB   | Endoplasmic reticulum {ECO:0000269 PubMed:23475612}. Endoplasmic reticulum lumen {ECO:0000269 PubMed:10636893, ECO:0000269 PubMed:23475612}. Melanosome {ECO:0000269 PubMed:12643545, ECO:0000269 PubMed:17081065}. Cell membrane {ECO:0000269 PubMed:21670307}; Peripheral membrane protein {ECO:0000305}. Note=Highly abundant. In some cell types, seems to be also secreted or associated with the plasma membrane, where it undergoes constant shedding and replacement from intracellular sources (Probable). Localizes near CD4-enriched regions on lymphoid cell surfaces (PubMed:11181151). Identified by mass spectrometry in melanosome fractions from stage I to stage IV (PubMed:10636893). Colocalizes with MTTP in the endoplasmic reticulum (PubMed:23475612). {ECO:0000269 PubMed:10636893, ECO:0000269 PubMed:11181151, ECO:0000269 PubMed:23475612, ECO:0000305}. |
| Cytochrome c oxidase subunit 5B, mitochondrial                    | P10606  | COX5B  | Mitochondrion inner membrane.                                                                                                                                                                                                                                                                                                                                                                                                                                                                                                                                                                                                                                                                                                                                                                                                                                                        |
| Protein kinase C and casein kinase substrate in neurons protein 3 | Q9UKS6  | PACSN3 | Cytoplasm {ECO:0000269 PubMed:11179684}. Cell membrane {ECO:0000250}; Peripheral membrane protein {ECO:0000250}; Cytoplasmic side {ECO:0000250}. Note=Detected at the inner aspect of the plasma membrane in myotubes. {ECO:0000250}.                                                                                                                                                                                                                                                                                                                                                                                                                                                                                                                                                                                                                                                |
| Glutamate dehydrogenase 1, mitochondrial                          | P00367  | GLUD1  | Mitochondrion matrix.                                                                                                                                                                                                                                                                                                                                                                                                                                                                                                                                                                                                                                                                                                                                                                                                                                                                |
| Ubiquitin-conjugating enzyme E2 N                                 | P61088  | UBE2N  | Nucleus {ECO:0000269 PubMed:19340006}. Cytoplasm {ECO:0000269 PubMed:19340006}.                                                                                                                                                                                                                                                                                                                                                                                                                                                                                                                                                                                                                                                                                                                                                                                                      |
| EH domain-containing protein 2                                    | Q9NZN4  | EHD2   | Cell membrane {ECO:0000269 PubMed:17233914}; Peripheral membrane protein {ECO:0000250 UniProtKB:Q8BH64}; Cytoplasmic side {ECO:0000250 UniProtKB:Q8BH64}. Membrane, caveola {ECO:0000250 UniProtKB:Q8BH64}; Peripheral membrane protein {ECO:0000250 UniProtKB:Q8BH64}; Cytoplasmic side {ECO:0000250 UniProtKB:Q8BH64}. Endosome membrane {ECO:0000250 UniProtKB:Q4V8H8}; Peripheral membrane protein {ECO:0000250 UniProtKB:Q4V8H8}; Cytoplasmic side {ECO:0000250 UniProtKB:Q4V8H8}. Cytoplasm, cytosol {ECO:0000250 UniProtKB:Q8BH64}. Note=Colocalizes with GLUT4 in intracellular tubulovesicular structures that are associated with cortical F-actin. Colocalizes with FER1L5 at plasma membrane in myoblasts and myotubes. {ECO:0000250 UniProtKB:Q8BH64}.                                                                                                                  |
| Glycerol-3-phosphate dehydrogenase [NAD(+)], cytoplasmic          | P21695  | GPD1   | Cytoplasm.                                                                                                                                                                                                                                                                                                                                                                                                                                                                                                                                                                                                                                                                                                                                                                                                                                                                           |
| Perilipin-3                                                       | O60664  | PLIN3  | Cytoplasm {ECO:0000269 PubMed:15545278, ECO:0000269 PubMed:26357594, ECO:0000269 PubMed:9590177}. Endosome membrane {ECO:0000305}; Peripheral membrane protein {ECO:0000305}; Cytoplasmic side {ECO:0000305}. Lipid droplet {ECO:0000305}. Note=Membrane associated on endosomes. Detected in the envelope and the core of lipid bodies and in lipid sails. {ECO:0000305}.                                                                                                                                                                                                                                                                                                                                                                                                                                                                                                           |

**Supplemental Table 1 Page 32. All proteins quantitated in study**

| Protein Name                                                        | Uniprot | Gene    | Subcellular localization                                                                                                                                                                                                                                                                                                                                                                                                                                                                                                                                                                                                                                                                                                                                                                                                                                                                                                                                                                                                                         |
|---------------------------------------------------------------------|---------|---------|--------------------------------------------------------------------------------------------------------------------------------------------------------------------------------------------------------------------------------------------------------------------------------------------------------------------------------------------------------------------------------------------------------------------------------------------------------------------------------------------------------------------------------------------------------------------------------------------------------------------------------------------------------------------------------------------------------------------------------------------------------------------------------------------------------------------------------------------------------------------------------------------------------------------------------------------------------------------------------------------------------------------------------------------------|
| Pentatricopeptide repeat domain-containing protein 3, mitochondrial | Q96EY7  | PTCD3   | Mitochondrion {ECO:0000269 PubMed:19427859, ECO:0000269 PubMed:23908630}.                                                                                                                                                                                                                                                                                                                                                                                                                                                                                                                                                                                                                                                                                                                                                                                                                                                                                                                                                                        |
| Y-box-binding protein 3                                             | P16989  | YBX3    | Cytoplasm. Nucleus.                                                                                                                                                                                                                                                                                                                                                                                                                                                                                                                                                                                                                                                                                                                                                                                                                                                                                                                                                                                                                              |
| CD59 glycoprotein                                                   | P13987  | CD59    | Cell membrane; Lipid-anchor, GPI-anchor. Secreted. Note=Soluble form found in a number of tissues.                                                                                                                                                                                                                                                                                                                                                                                                                                                                                                                                                                                                                                                                                                                                                                                                                                                                                                                                               |
| Phosphoglycerate mutase 2                                           | P15259  | PGAM2   | 0                                                                                                                                                                                                                                                                                                                                                                                                                                                                                                                                                                                                                                                                                                                                                                                                                                                                                                                                                                                                                                                |
| Peroxiredoxin-2                                                     | P32119  | PRDX2   | Cytoplasm {ECO:0000269 PubMed:9497357}.                                                                                                                                                                                                                                                                                                                                                                                                                                                                                                                                                                                                                                                                                                                                                                                                                                                                                                                                                                                                          |
| Caveolin-3                                                          | P56539  | CAV3    | Golgi apparatus membrane {ECO:0000250}; Peripheral membrane protein {ECO:0000250}. Cell membrane {ECO:0000250 UniProtKB:P51638}; Peripheral membrane protein {ECO:0000250}. Membrane, caveola {ECO:0000250 UniProtKB:P51637}; Peripheral membrane protein {ECO:0000250}. Cell membrane, sarcolemma {ECO:0000250 UniProtKB:P51637}. Note=Potential hairpin-like structure in the membrane. Membrane protein of caveolae (By similarity). {ECO:0000250}.                                                                                                                                                                                                                                                                                                                                                                                                                                                                                                                                                                                           |
| Troponin T, fast skeletal muscle                                    | P45378  | TNNT3   | 0                                                                                                                                                                                                                                                                                                                                                                                                                                                                                                                                                                                                                                                                                                                                                                                                                                                                                                                                                                                                                                                |
| Glyceraldehyde-3-phosphate dehydrogenase                            | P04406  | GAPDH   | Cytoplasm, cytosol {ECO:0000269 PubMed:12829261}. Nucleus {ECO:0000250}. Cytoplasm, perinuclear region {ECO:0000269 PubMed:12829261}. Membrane {ECO:0000269 PubMed:12829261}. Cytoplasm, cytoskeleton {ECO:0000250}. Note=Translocates to the nucleus following S-nitrosylation and interaction with SIAH1, which contains a nuclear localization signal (By similarity). Postnuclear and Perinuclear regions. {ECO:0000250}.                                                                                                                                                                                                                                                                                                                                                                                                                                                                                                                                                                                                                    |
| Thioredoxin-dependent peroxide reductase, mitochondrial             | P30048  | PRDX3   | Mitochondrion {ECO:0000250 UniProtKB:P35705}. Cytoplasm {ECO:0000305 PubMed:12492477}. Early endosome {ECO:0000269 PubMed:15750338}. Note=Localizes to early endosomes in a RPS6KC1-dependent manner. {ECO:0000269 PubMed:15750338}.                                                                                                                                                                                                                                                                                                                                                                                                                                                                                                                                                                                                                                                                                                                                                                                                             |
| Protein FAM162A                                                     | Q96A26  | FAM162A | Membrane {ECO:0000305}; Single-pass membrane protein {ECO:0000305}. Mitochondrion {ECO:0000269 PubMed:15082785, ECO:0000269 PubMed:16698020}.                                                                                                                                                                                                                                                                                                                                                                                                                                                                                                                                                                                                                                                                                                                                                                                                                                                                                                    |
| Dysferlin                                                           | O75923  | DYSF    | Cell membrane, sarcolemma; Single-pass type II membrane protein. Cytoplasmic vesicle membrane {ECO:0000250}; Single-pass type II membrane protein {ECO:0000250}. Cell membrane. Note=Colocalizes, during muscle differentiation, with BIN1 in the T-tubule system of myotubules and at the site of contact between two myotubes or a myoblast and a myotube. Wounding of myotubes led to its focal enrichment to the site of injury and to its relocalization in a Ca(2+)-dependent manner toward the plasma membrane. Colocalizes with AHNAK, AHNAK2 and PARVB at the sarcolemma of skeletal muscle. Detected on the apical plasma membrane of the syncytiotrophoblast. Reaches the plasmma membrane through a caveolin-independent mechanism. Retained by caveolin at the plasmma membrane (By similarity). Colocalizes, during muscle differentiation, with CACNA1S in the T-tubule system of myotubules (By similarity). Accumulates and colocalizes with fusion vesicles at the sarcolemma disruption sites (By similarity). {ECO:0000250}. |

**Supplemental Table 1 Page 33. All proteins quantitated in study**

| Protein Name                                                | Uniprot | Gene    | Subcellular localization                                                                                                                                                                                                                                                                                                                                                                                                                                                                                                                                                                                                                                                                                                                                                                                                                                                                                                       |
|-------------------------------------------------------------|---------|---------|--------------------------------------------------------------------------------------------------------------------------------------------------------------------------------------------------------------------------------------------------------------------------------------------------------------------------------------------------------------------------------------------------------------------------------------------------------------------------------------------------------------------------------------------------------------------------------------------------------------------------------------------------------------------------------------------------------------------------------------------------------------------------------------------------------------------------------------------------------------------------------------------------------------------------------|
| Protoporphyrinogen oxidase                                  | P50336  | PPOX    | Mitochondrion inner membrane {ECO:0000250}; Peripheral membrane protein {ECO:0000250}; Intermembrane side {ECO:0000250}.                                                                                                                                                                                                                                                                                                                                                                                                                                                                                                                                                                                                                                                                                                                                                                                                       |
| Electron transfer flavoprotein subunit alpha, mitochondrial | P13804  | ETFa    | Mitochondrion matrix {ECO:0000305}.                                                                                                                                                                                                                                                                                                                                                                                                                                                                                                                                                                                                                                                                                                                                                                                                                                                                                            |
| Isocitrate dehydrogenase [NAD] subunit beta, mitochondrial  | O43837  | IDH3B   | Mitochondrion.                                                                                                                                                                                                                                                                                                                                                                                                                                                                                                                                                                                                                                                                                                                                                                                                                                                                                                                 |
| Dehydrogenase/reductase SDR family member 7                 | Q9Y394  | DHRS7   | 0                                                                                                                                                                                                                                                                                                                                                                                                                                                                                                                                                                                                                                                                                                                                                                                                                                                                                                                              |
| Programmed cell death 6-interacting protein                 | Q8WUM4  | PDCD6IP | Cytoplasm, cytosol {ECO:0000250 UniProtKB:Q9QZA2}. Melanosome {ECO:0000269 PubMed:17081065}. Cytoplasm, cytoskeleton, microtubule organizing center, centrosome {ECO:0000269 PubMed:17556548, ECO:0000269 PubMed:17853893}. Secreted, exosome {ECO:0000269 PubMed:22660413}. Cell junction, tight junction {ECO:0000250 UniProtKB:Q9WU78}. Midbody, Midbody ring {ECO:0000269 PubMed:17853893, ECO:0000269 PubMed:18641129}. Note=Identified by mass spectrometry in melanosome fractions from stage I to stage IV. Colocalized with CEP55 at centrosomes of non-dividing cells. Component of the actomyosin-tight junction complex (By similarity). PDCD6IP targeting to the midbody requires the interaction with CEP55 (PubMed:18641129). {ECO:0000250 UniProtKB:Q9QZA2, ECO:0000250 UniProtKB:Q9WU78, ECO:0000269 PubMed:17081065, ECO:0000269 PubMed:17556548, ECO:0000269 PubMed:17853893, ECO:0000269 PubMed:18641129}. |
| Methyltransferase-like protein 7A                           | Q9H8H3  | METTL7A | Lipid droplet {ECO:0000269 PubMed:18477614, ECO:0000269 PubMed:19773358}. Endoplasmic reticulum {ECO:0000269 PubMed:19773358}. Membrane {ECO:0000269 PubMed:18477614}.                                                                                                                                                                                                                                                                                                                                                                                                                                                                                                                                                                                                                                                                                                                                                         |
| Peroxiredoxin-5, mitochondrial                              | P30044  | PRDX5   | Isoform Mitochondrial: Mitochondrion {ECO:0000269 PubMed:10521424, ECO:0000269 PubMed:10751410}.; Isoform Cytoplasmic+peroxisomal: Cytoplasm {ECO:0000269 PubMed:10514471, ECO:0000269 PubMed:10751410}. Peroxisome matrix {ECO:0000269 PubMed:10514471, ECO:0000269 PubMed:10521424, ECO:0000269 PubMed:10751410}. Note=Imported into peroxisomes via peroxisomal targeting signal 1 receptor PEX5. {ECO:0000269 PubMed:10514471}.                                                                                                                                                                                                                                                                                                                                                                                                                                                                                            |
| Acylglycerol kinase, mitochondrial                          | Q53H12  | AGK     | Mitochondrion inner membrane {ECO:0000269 PubMed:15939762, ECO:0000269 PubMed:16269826, ECO:0000269 PubMed:28712724, ECO:0000269 PubMed:28712726}; Peripheral membrane protein {ECO:0000269 PubMed:28712724}. Mitochondrion intermembrane space {ECO:0000269 PubMed:28712724, ECO:0000269 PubMed:28712726}. Note=Localizes in the mitochondrion intermembrane space, where it associates with the inner membrane (PubMed:28712724). It is unclear whether the N-terminal hydrophobic region forms a transmembrane region or associates with the membrane without crossing it (PubMed:28712724, PubMed:28712726). {ECO:0000269 PubMed:28712724, ECO:0000269 PubMed:28712726}.                                                                                                                                                                                                                                                   |

**Supplemental Table 1 Page 34. All proteins quantitated in study**

| Protein Name                                        | Uniprot | Gene   | Subcellular localization                                                                                                                                                                                                                                                                                                                                                                                                                                                                                                                                                                                                                                                                                                                                                                                                                                                                                                                                                                                                                                                                                                                                                                                                                                                                                                                                                                                                              |
|-----------------------------------------------------|---------|--------|---------------------------------------------------------------------------------------------------------------------------------------------------------------------------------------------------------------------------------------------------------------------------------------------------------------------------------------------------------------------------------------------------------------------------------------------------------------------------------------------------------------------------------------------------------------------------------------------------------------------------------------------------------------------------------------------------------------------------------------------------------------------------------------------------------------------------------------------------------------------------------------------------------------------------------------------------------------------------------------------------------------------------------------------------------------------------------------------------------------------------------------------------------------------------------------------------------------------------------------------------------------------------------------------------------------------------------------------------------------------------------------------------------------------------------------|
| ATP synthase F(0) complex subunit B1, mitochondrial | P24539  | ATP5PB | Mitochondrion. Mitochondrion inner membrane.                                                                                                                                                                                                                                                                                                                                                                                                                                                                                                                                                                                                                                                                                                                                                                                                                                                                                                                                                                                                                                                                                                                                                                                                                                                                                                                                                                                          |
| Annexin A5                                          | P08758  | ANXA5  | 0                                                                                                                                                                                                                                                                                                                                                                                                                                                                                                                                                                                                                                                                                                                                                                                                                                                                                                                                                                                                                                                                                                                                                                                                                                                                                                                                                                                                                                     |
| Glycogen debranching enzyme                         | P35573  | AGL    | Cytoplasm {ECO:0000269 PubMed:17908927}. Note=Under glycogenolytic conditions localizes to the nucleus.                                                                                                                                                                                                                                                                                                                                                                                                                                                                                                                                                                                                                                                                                                                                                                                                                                                                                                                                                                                                                                                                                                                                                                                                                                                                                                                               |
| GDH/6PGL endoplasmic bifunctional protein           | O95479  | H6PD   | Endoplasmic reticulum lumen. Note=Microsomes, endoplasmic reticulum lumen.                                                                                                                                                                                                                                                                                                                                                                                                                                                                                                                                                                                                                                                                                                                                                                                                                                                                                                                                                                                                                                                                                                                                                                                                                                                                                                                                                            |
| PDZ and LIM domain protein 5                        | Q96HC4  | PDLIM5 | Cell junction, synapse, postsynaptic cell membrane, postsynaptic density {ECO:0000250}. Cell junction, synapse, synaptosome {ECO:0000250}. Cytoplasm {ECO:0000250}. Note=Detected both at presynaptic and postsynaptic sites. {ECO:0000250}.                                                                                                                                                                                                                                                                                                                                                                                                                                                                                                                                                                                                                                                                                                                                                                                                                                                                                                                                                                                                                                                                                                                                                                                          |
| Synemin                                             | O15061  | SYNM   | Cytoplasm, cytoskeleton. Cell junction, adherens junction. Note=There are at least two distinct SYNM subpopulations, one in which SYMN interacts with DES within the Z-lines, and another in which it interacts with both DTNA and DES at the costamere.                                                                                                                                                                                                                                                                                                                                                                                                                                                                                                                                                                                                                                                                                                                                                                                                                                                                                                                                                                                                                                                                                                                                                                              |
| Eukaryotic translation initiation factor 4 gamma 2  | P78344  | EIF4G2 | 0                                                                                                                                                                                                                                                                                                                                                                                                                                                                                                                                                                                                                                                                                                                                                                                                                                                                                                                                                                                                                                                                                                                                                                                                                                                                                                                                                                                                                                     |
| Ras-related protein Rab-7a                          | P51149  | RAB7A  | Cytoplasmic vesicle, phagosome membrane {ECO:0000269 PubMed:12944476, ECO:0000269 PubMed:21255211}; Peripheral membrane protein {ECO:0000305}; Cytoplasmic side {ECO:0000305}. Late endosome membrane {ECO:0000269 PubMed:12944476, ECO:0000269 PubMed:14617358, ECO:0000269 PubMed:16176980, ECO:0000269 PubMed:20028791}; Peripheral membrane protein {ECO:0000305}; Cytoplasmic side {ECO:0000305}. Lysosome membrane {ECO:0000269 PubMed:12944476, ECO:0000269 PubMed:20028791}; Peripheral membrane protein {ECO:0000305}; Cytoplasmic side {ECO:0000305}. Melanosome membrane {ECO:0000269 PubMed:12643545, ECO:0000269 PubMed:17081065}; Peripheral membrane protein {ECO:0000305}; Cytoplasmic side {ECO:0000305}. Cytoplasmic vesicle, autophagosome membrane {ECO:0000269 PubMed:20028791}; Peripheral membrane protein {ECO:0000305}; Cytoplasmic side {ECO:0000305}. Lipid droplet {ECO:0000250 UniProtKB:P51150}. Endosome membrane {ECO:0000269 PubMed:22431521}. Note=Colocalizes with OSBPL1A at the late endosome (PubMed:16176980). Found in the ruffled border (a late endosomal-like compartment in the plasma membrane) of bone-resorbing osteoclasts. Recruited to phagosomes containing S.aureus or Mycobacterium (PubMed:21255211). Lipid droplet localization is increased upon ADRB2 stimulation (By similarity). {ECO:0000250 UniProtKB:P51150, ECO:0000269 PubMed:16176980, ECO:0000269 PubMed:21255211}. |

**Supplemental Table 1 Page 35. All proteins quantitated in study**

| Protein Name                                          | Uniprot | Gene     | Subcellular localization                                                                                                                                                                                                                                                                                                                                                                                                                                                                                                                                                                                                                                                                                                                                                                                                                                                                                                                                                                                                                                                                                                                                                                                                                                                                                                                                                                                                                 |
|-------------------------------------------------------|---------|----------|------------------------------------------------------------------------------------------------------------------------------------------------------------------------------------------------------------------------------------------------------------------------------------------------------------------------------------------------------------------------------------------------------------------------------------------------------------------------------------------------------------------------------------------------------------------------------------------------------------------------------------------------------------------------------------------------------------------------------------------------------------------------------------------------------------------------------------------------------------------------------------------------------------------------------------------------------------------------------------------------------------------------------------------------------------------------------------------------------------------------------------------------------------------------------------------------------------------------------------------------------------------------------------------------------------------------------------------------------------------------------------------------------------------------------------------|
| Stromal interaction molecule 1                        | Q13586  | STIM1    | Cell membrane; Single-pass type I membrane protein {ECO:0000269 PubMed:11004585, ECO:0000269 PubMed:16005298, ECO:0000269 PubMed:16208375, ECO:0000269 PubMed:18854159, ECO:0000269 PubMed:19249086, ECO:0000269 PubMed:27185316, ECO:0000269 PubMed:28219928}. Endoplasmic reticulum membrane; Single-pass type I membrane protein {ECO:0000269 PubMed:16005298, ECO:0000269 PubMed:16208375, ECO:0000269 PubMed:18854159, ECO:0000269 PubMed:19249086, ECO:0000269 PubMed:26322679, ECO:0000269 PubMed:27185316}. Cytoplasm, cytoskeleton {ECO:0000269 PubMed:19632184}. Sarcoplasmic reticulum {ECO:0000269 PubMed:25326555}. Note=Translocates from the endoplasmic reticulum to the cell membrane in response to a depletion of intracellular calcium and is detected at punctae corresponding to junctions between the endoplasmic reticulum and the cell membrane (PubMed:19249086, PubMed:16005298, PubMed:16208375, PubMed:18854159). Associated with the microtubule network at the growing distal tip of microtubules (PubMed:19632184). Colocalizes with ORAI1 at the cell membrane (PubMed:27185316). Colocalizes preferentially with CASQ1 at endoplasmic reticulum in response to a depletion of intracellular calcium (PubMed:27185316). {ECO:0000269 PubMed:16005298, ECO:0000269 PubMed:16208375, ECO:0000269 PubMed:18854159, ECO:0000269 PubMed:19249086, ECO:0000269 PubMed:19632184, ECO:0000269 PubMed:27185316}. |
| Carbonyl reductase family member 4                    | Q8N4T8  | CBR4     | Mitochondrion matrix {ECO:0000269 PubMed:19000905, ECO:0000269 PubMed:19571038}.                                                                                                                                                                                                                                                                                                                                                                                                                                                                                                                                                                                                                                                                                                                                                                                                                                                                                                                                                                                                                                                                                                                                                                                                                                                                                                                                                         |
| Calcium-binding mitochondrial carrier protein Aralar1 | O75746  | SLC25A12 | Mitochondrion inner membrane {ECO:0000269 PubMed:9722566}; Multi-pass membrane protein {ECO:0000269 PubMed:9722566}.                                                                                                                                                                                                                                                                                                                                                                                                                                                                                                                                                                                                                                                                                                                                                                                                                                                                                                                                                                                                                                                                                                                                                                                                                                                                                                                     |
| Atypical kinase COQ8A, mitochondrial                  | Q8NI60  | COQ8A    | Mitochondrion {ECO:0000269 PubMed:11888884, ECO:0000269 PubMed:25498144}. Membrane {ECO:0000255}; Single-pass membrane protein {ECO:0000255, ECO:0000305 PubMed:25216398}.                                                                                                                                                                                                                                                                                                                                                                                                                                                                                                                                                                                                                                                                                                                                                                                                                                                                                                                                                                                                                                                                                                                                                                                                                                                               |
| Membrane primary amine oxidase                        | Q16853  | AOC3     | Cell membrane {ECO:0000269 PubMed:9653080}; Single-pass type II membrane protein {ECO:0000269 PubMed:9653080}.                                                                                                                                                                                                                                                                                                                                                                                                                                                                                                                                                                                                                                                                                                                                                                                                                                                                                                                                                                                                                                                                                                                                                                                                                                                                                                                           |
| PGC-1 and ERR-induced regulator in muscle protein 1   | Q5SV97  | PERM1    | Cytoplasm {ECO:0000250 UniProtKB:Q149B8}. Nucleus {ECO:0000250 UniProtKB:Q149B8}. Note=Shows a nuclear localization in the presence of PPARGC1A. {ECO:0000250 UniProtKB:Q149B8}.                                                                                                                                                                                                                                                                                                                                                                                                                                                                                                                                                                                                                                                                                                                                                                                                                                                                                                                                                                                                                                                                                                                                                                                                                                                         |
| Epimerase family protein SDR39U1                      | Q9NRG7  | SDR39U1  | 0                                                                                                                                                                                                                                                                                                                                                                                                                                                                                                                                                                                                                                                                                                                                                                                                                                                                                                                                                                                                                                                                                                                                                                                                                                                                                                                                                                                                                                        |

**Supplemental Table 1 Page 36. All proteins quantitated in study**

| Protein Name                                                     | Uniprot | Gene   | Subcellular localization                                                                                                                                                                                                                                                                                                                                                                                                                                                                                                                                                                                                                                                                                                                                                                                                                                                                                      |
|------------------------------------------------------------------|---------|--------|---------------------------------------------------------------------------------------------------------------------------------------------------------------------------------------------------------------------------------------------------------------------------------------------------------------------------------------------------------------------------------------------------------------------------------------------------------------------------------------------------------------------------------------------------------------------------------------------------------------------------------------------------------------------------------------------------------------------------------------------------------------------------------------------------------------------------------------------------------------------------------------------------------------|
| Junctophilin-2                                                   | Q9BR39  | JPH2   | Junctophilin-2: Cell membrane {ECO:0000250 UniProtKB:Q9ET78}; Peripheral membrane protein {ECO:0000250 UniProtKB:Q9ET78}. Sarcoplasmic reticulum membrane {ECO:0000250 UniProtKB:Q9ET78}; Single-pass type IV membrane protein {ECO:0000250 UniProtKB:Q9ET78}. Endoplasmic reticulum membrane {ECO:0000250 UniProtKB:Q9ET78}; Single-pass type IV membrane protein {ECO:0000250 UniProtKB:Q9ET78}. Note=The transmembrane domain is anchored in sarcoplasmic reticulum membrane, while the N-terminal part associates with the plasma membrane. In heart cells, it predominantly associates along Z lines within myocytes. In skeletal muscle, it is specifically localized at the junction of A and I bands. {ECO:0000250 UniProtKB:Q9ET78}.; Junctophilin-2 N-terminal fragment: Nucleus {ECO:0000269 PubMed:30409805}. Note=Accumulates in the nucleus of stressed hearts. {ECO:0000250 UniProtKB:Q9ET78}. |
| ATP synthase-coupling factor 6, mitochondrial                    | P18859  | ATP5PF | Mitochondrion. Mitochondrion inner membrane.                                                                                                                                                                                                                                                                                                                                                                                                                                                                                                                                                                                                                                                                                                                                                                                                                                                                  |
| Creatine kinase S-type, mitochondrial                            | P17540  | CKMT2  | Mitochondrion inner membrane; Peripheral membrane protein; Intermembrane side.                                                                                                                                                                                                                                                                                                                                                                                                                                                                                                                                                                                                                                                                                                                                                                                                                                |
| Mycophenolic acid acyl-glucuronide esterase, mitochondrial       | Q9NUJ1  | ABHD10 | Mitochondrion {ECO:0000305}.                                                                                                                                                                                                                                                                                                                                                                                                                                                                                                                                                                                                                                                                                                                                                                                                                                                                                  |
| Trifunctional enzyme subunit alpha, mitochondrial                | P40939  | HADHA  | Mitochondrion.                                                                                                                                                                                                                                                                                                                                                                                                                                                                                                                                                                                                                                                                                                                                                                                                                                                                                                |
| Isovaleryl-CoA dehydrogenase, mitochondrial                      | P26440  | IVD    | Mitochondrion matrix.                                                                                                                                                                                                                                                                                                                                                                                                                                                                                                                                                                                                                                                                                                                                                                                                                                                                                         |
| Mitochondrial chaperone BCS1                                     | Q9Y276  | BCS1L  | Mitochondrion inner membrane {ECO:0000269 PubMed:18628306, ECO:0000269 PubMed:9878253}; Single-pass membrane protein {ECO:0000269 PubMed:18628306, ECO:0000269 PubMed:9878253}.                                                                                                                                                                                                                                                                                                                                                                                                                                                                                                                                                                                                                                                                                                                               |
| ATP-binding cassette sub-family B member 7, mitochondrial        | O75027  | ABCB7  | Mitochondrion inner membrane {ECO:0000305}; Multi-pass membrane protein {ECO:0000255 PROSITE-ProRule:PRU00441}.                                                                                                                                                                                                                                                                                                                                                                                                                                                                                                                                                                                                                                                                                                                                                                                               |
| Carnitine O-palmitoyltransferase 2, mitochondrial                | P23786  | CPT2   | Mitochondrion inner membrane; Peripheral membrane protein; Matrix side.                                                                                                                                                                                                                                                                                                                                                                                                                                                                                                                                                                                                                                                                                                                                                                                                                                       |
| Calcium/calmodulin-dependent protein kinase type II subunit beta | Q13554  | CAMK2B | Cytoplasm, cytoskeleton {ECO:0000269 PubMed:21529938}. Cytoplasm, cytoskeleton, microtubule organizing center, centrosome {ECO:0000250}. Sarcoplasmic reticulum membrane {ECO:0000269 PubMed:21529938}; Peripheral membrane protein {ECO:0000269 PubMed:21529938}; Cytoplasmic side {ECO:0000269 PubMed:21529938}. Cell junction, synapse {ECO:0000250 UniProtKB:P08413}. Note=In slow-twitch muscle, evenly distributed between longitudinal SR and junctional SR.                                                                                                                                                                                                                                                                                                                                                                                                                                           |

**Supplemental Table 1 Page 37. All proteins quantitated in study**

| Protein Name                                                  | Uniprot | Gene    | Subcellular localization                                                                                                                                                                                                                                                                                                                                                                                                                                                                                                                                                |
|---------------------------------------------------------------|---------|---------|-------------------------------------------------------------------------------------------------------------------------------------------------------------------------------------------------------------------------------------------------------------------------------------------------------------------------------------------------------------------------------------------------------------------------------------------------------------------------------------------------------------------------------------------------------------------------|
| Catechol O-methyltransferase                                  | P21964  | COMT    | Isoform Soluble: Cytoplasm.; Isoform Membrane-bound: Cell membrane; Single-pass type II membrane protein; Extracellular side {ECO:0000269 PubMed:21846718}.                                                                                                                                                                                                                                                                                                                                                                                                             |
| Kelch-like protein 40                                         | Q2TBA0  | KLHL40  | Cytoplasm {ECO:0000250 UniProtKB:Q9D783}. Cytoplasm, myofibril, sarcomere, A band {ECO:0000269 PubMed:23746549}. Cytoplasm, myofibril, sarcomere, I band {ECO:0000250 UniProtKB:Q9D783}.                                                                                                                                                                                                                                                                                                                                                                                |
| Glycerol-3-phosphate dehydrogenase, mitochondrial             | P43304  | GPD2    | Mitochondrion.                                                                                                                                                                                                                                                                                                                                                                                                                                                                                                                                                          |
| Myosin light chain 3                                          | P08590  | MYL3    | 0                                                                                                                                                                                                                                                                                                                                                                                                                                                                                                                                                                       |
| Filamin-C                                                     | Q14315  | FLNC    | Cytoplasm {ECO:0000269 PubMed:11038172, ECO:0000269 PubMed:25351925}. Membrane {ECO:0000269 PubMed:11038172}; Peripheral membrane protein {ECO:0000269 PubMed:11038172}. Cytoplasm, cytoskeleton {ECO:0000269 PubMed:11038172}. Cytoplasm, myofibril, sarcomere, Z line {ECO:0000269 PubMed:11038172}. Note=A small amount localizes at membranes. In striated muscle cells, it predominantly localizes in myofibrillar Z lines, while a minor fraction localizes with subsarcolemme. Targeting to developing and mature Z lines is mediated by the intradomain insert. |
| Isobutyryl-CoA dehydrogenase, mitochondrial                   | Q9UKU7  | ACAD8   | Mitochondrion {ECO:0000269 PubMed:11013134}.                                                                                                                                                                                                                                                                                                                                                                                                                                                                                                                            |
| Protein NDRG2                                                 | Q9UN36  | NDRG2   | Cytoplasm. Cytoplasm, perinuclear region. Cell projection, growth cone {ECO:0000250}. Note=In neurons, seems to concentrate at axonal growth cone. Perinuclear in neurons (By similarity). {ECO:0000250}.                                                                                                                                                                                                                                                                                                                                                               |
| NADH dehydrogenase [ubiquinone] 1 alpha subcomplex subunit 11 | Q86Y39  | NDUFA11 | Mitochondrion inner membrane {ECO:0000305 PubMed:12611891}; Multi-pass membrane protein {ECO:0000255}; Matrix side {ECO:0000305}.                                                                                                                                                                                                                                                                                                                                                                                                                                       |
| Alpha-actinin-1                                               | P12814  | ACTN1   | Cytoplasm, cytoskeleton {ECO:0000269 PubMed:24069336, ECO:0000269 PubMed:7750553}. Cytoplasm, myofibril, sarcomere, Z line {ECO:0000269 PubMed:7750553}. Cell membrane {ECO:0000250 UniProtKB:Q9Z1P2}. Cell junction {ECO:0000250 UniProtKB:Q9Z1P2}. Cell projection, ruffle {ECO:0000250 UniProtKB:Q7TPR4}. Note=Colocalizes with MYOZ2 and PPP3CA at the Z-line of heart and skeletal muscle. Colocalizes with PSD in membrane ruffles and central reticular structures. {ECO:0000250 UniProtKB:Q7TPR4}.                                                              |
| Syntaxin-binding protein 3                                    | O00186  | STXBP3  | Cytoplasm, cytosol {ECO:0000269 PubMed:10194441}. Cell membrane {ECO:0000269 PubMed:10194441}. Note=In platelets, predominantly cytosolic. Low amounts membrane-associated.                                                                                                                                                                                                                                                                                                                                                                                             |
| Cytochrome b5 type B                                          | O43169  | CYB5B   | Mitochondrion outer membrane {ECO:0000250 UniProtKB:P04166}.                                                                                                                                                                                                                                                                                                                                                                                                                                                                                                            |

**Supplemental Table 1 Page 38. All proteins quantitated in study**

| Protein Name                                        | Uniprot | Gene   | Subcellular localization                                                                                                                                                                                                                                                                                                                                                                                                                                                                                                                                                                                                                                                                                                                                                                                                                                                                                                                                                                                                                                                                                                                                                                                                                                                                                 |
|-----------------------------------------------------|---------|--------|----------------------------------------------------------------------------------------------------------------------------------------------------------------------------------------------------------------------------------------------------------------------------------------------------------------------------------------------------------------------------------------------------------------------------------------------------------------------------------------------------------------------------------------------------------------------------------------------------------------------------------------------------------------------------------------------------------------------------------------------------------------------------------------------------------------------------------------------------------------------------------------------------------------------------------------------------------------------------------------------------------------------------------------------------------------------------------------------------------------------------------------------------------------------------------------------------------------------------------------------------------------------------------------------------------|
| Lysine--tRNA ligase                                 | Q15046  | KARS   | Isoform Cytoplasmic: Cytoplasm, cytosol {ECO:0000269 PubMed:10952987, ECO:0000269 PubMed:19289464, ECO:0000269 PubMed:23159739, ECO:0000269 PubMed:28887846}. Cytoplasm {ECO:0000269 PubMed:15220430}. Nucleus {ECO:0000269 PubMed:15220430, ECO:0000269 PubMed:23159739}. Cell membrane {ECO:0000269 PubMed:15220430}; Peripheral membrane protein {ECO:0000269 PubMed:15220430}. Secreted {ECO:0000269 PubMed:15851690}. Note=Secretion is induced by TNF-alpha (PubMed:15851690). Cytosolic in quiescent mast cells. Translocates into the nucleus in response to mast cell activation by immunoglobulin E (PubMed:23159739). {ECO:0000269 PubMed:15851690, ECO:0000269 PubMed:23159739}.; Isoform Mitochondrial: Mitochondrion {ECO:0000269 PubMed:10952987}.                                                                                                                                                                                                                                                                                                                                                                                                                                                                                                                                        |
| Peptidyl-prolyl cis-trans isomerase FKBP1A          | P62942  | FKBP1A | Cytoplasm, cytosol {ECO:0000269 PubMed:1701173}. Sarcoplasmic reticulum membrane {ECO:0000250 UniProtKB:P62943}; Peripheral membrane protein {ECO:0000250 UniProtKB:P62943}; Cytoplasmic side {ECO:0000250 UniProtKB:P62943}.                                                                                                                                                                                                                                                                                                                                                                                                                                                                                                                                                                                                                                                                                                                                                                                                                                                                                                                                                                                                                                                                            |
| Protein disulfide-isomerase A3                      | P30101  | PDIA3  | Endoplasmic reticulum {ECO:0000269 PubMed:23826168}. Endoplasmic reticulum lumen {ECO:0000250}. Melanosome {ECO:0000269 PubMed:12643545, ECO:0000269 PubMed:17081065}. Note=Identified by mass spectrometry in melanosome fractions from stage I to stage IV (PubMed:12643545). {ECO:0000269 PubMed:12643545}.                                                                                                                                                                                                                                                                                                                                                                                                                                                                                                                                                                                                                                                                                                                                                                                                                                                                                                                                                                                           |
| D-beta-hydroxybutyrate dehydrogenase, mitochondrial | Q02338  | BDH1   | Mitochondrion inner membrane {ECO:0000250 UniProtKB:Q02337}. Mitochondrion matrix {ECO:0000250 UniProtKB:Q02337}.                                                                                                                                                                                                                                                                                                                                                                                                                                                                                                                                                                                                                                                                                                                                                                                                                                                                                                                                                                                                                                                                                                                                                                                        |
| Ubiquitin-60S ribosomal protein L40                 | P62987  | UBA52  | Ubiquitin: Cytoplasm {ECO:0000250}. Nucleus {ECO:0000250}.; 60S ribosomal protein L40: Cytoplasm {ECO:0000250}.                                                                                                                                                                                                                                                                                                                                                                                                                                                                                                                                                                                                                                                                                                                                                                                                                                                                                                                                                                                                                                                                                                                                                                                          |
| Reticulon-4                                         | Q9NQC3  | RTN4   | Isoform A: Endoplasmic reticulum membrane {ECO:0000269 PubMed:25612671, ECO:0000269 PubMed:26906412, ECO:0000269 PubMed:27619977, ECO:0000269 PubMed:27786289}; Multi-pass membrane protein {ECO:0000255}. Cell membrane; Multi-pass membrane protein {ECO:0000255}; Cytoplasmic side {ECO:0000269 PubMed:27786289}. Note=Anchored to the membrane of the endoplasmic reticulum (ER) through 2 putative transmembrane domains. Localizes throughout the ER tubular network (PubMed:27619977). Co-localizes with TMEM33 at the ER sheets. {ECO:0000269 PubMed:25612671, ECO:0000269 PubMed:27619977}.; Isoform B: Endoplasmic reticulum membrane {ECO:0000269 PubMed:27786289}; Multi-pass membrane protein {ECO:0000255}. Cell membrane {ECO:0000269 PubMed:15034570}; Multi-pass membrane protein {ECO:0000255}; Extracellular side {ECO:0000269 PubMed:15034570}. Cell junction {ECO:0000269 PubMed:21183689}. Note=Mainly located on endoplasmic reticulum tubules and sheet edges (PubMed:27786289). Upon ICAM1 engagement, redistributed toward endothelial junctions where interacts with CDH5 (PubMed:21183689). {ECO:0000269 PubMed:21183689, ECO:0000269 PubMed:27786289}.; Isoform C: Endoplasmic reticulum membrane {ECO:0000269 PubMed:25612671}; Multi-pass membrane protein {ECO:0000255}. |

**Supplemental Table 1 Page 39. All proteins quantitated in study**

| Protein Name                                                 | Uniprot | Gene    | Subcellular localization                                                                                                                                                                                                                                                                                                                                                                                                                                                                                                                                                                                                                                                                                                                                                                                                                                                                                                                                                                                                                                                                                                                                                                                                                                                           |
|--------------------------------------------------------------|---------|---------|------------------------------------------------------------------------------------------------------------------------------------------------------------------------------------------------------------------------------------------------------------------------------------------------------------------------------------------------------------------------------------------------------------------------------------------------------------------------------------------------------------------------------------------------------------------------------------------------------------------------------------------------------------------------------------------------------------------------------------------------------------------------------------------------------------------------------------------------------------------------------------------------------------------------------------------------------------------------------------------------------------------------------------------------------------------------------------------------------------------------------------------------------------------------------------------------------------------------------------------------------------------------------------|
| Long-chain-fatty-acid--CoA ligase 3                          | O95573  | ACSL3   | Mitochondrion outer membrane {ECO:0000250}; Single-pass type III membrane protein {ECO:0000250}. Peroxisome membrane {ECO:0000250}; Single-pass type III membrane protein {ECO:0000250}. Microsome membrane {ECO:0000250}; Single-pass type III membrane protein {ECO:0000250}. Endoplasmic reticulum membrane {ECO:0000250}; Single-pass type III membrane protein {ECO:0000250}.                                                                                                                                                                                                                                                                                                                                                                                                                                                                                                                                                                                                                                                                                                                                                                                                                                                                                                 |
| Triadin                                                      | Q13061  | TRDN    | Cell membrane {ECO:0000269 PubMed:22422768}. Sarcoplasmic reticulum membrane {ECO:0000269 PubMed:22422768, ECO:0000269 PubMed:24325401}; Single-pass type II membrane protein {ECO:0000269 PubMed:22422768, ECO:0000269 PubMed:24325401}.                                                                                                                                                                                                                                                                                                                                                                                                                                                                                                                                                                                                                                                                                                                                                                                                                                                                                                                                                                                                                                          |
| Trifunctional enzyme subunit beta, mitochondrial             | P55084  | HADHB   | Mitochondrion {ECO:0000269 PubMed:21527675}. Mitochondrion inner membrane {ECO:0000269 PubMed:21527675}. Mitochondrion outer membrane {ECO:0000269 PubMed:21527675}. Endoplasmic reticulum {ECO:0000269 PubMed:21527675}.                                                                                                                                                                                                                                                                                                                                                                                                                                                                                                                                                                                                                                                                                                                                                                                                                                                                                                                                                                                                                                                          |
| CD81 antigen                                                 | P60033  | CD81    | Cell membrane {ECO:0000269 PubMed:1383329, ECO:0000269 PubMed:1695320, ECO:0000269 PubMed:20237408, ECO:0000269 PubMed:22307619, ECO:0000269 PubMed:2398277}; Multi-pass membrane protein {ECO:0000255}. Basolateral cell membrane {ECO:0000269 PubMed:20375010}; Multi-pass membrane protein {ECO:0000255}. Note=Associates with CLDN1 and the CLDN1-CD81 complex localizes to the basolateral cell membrane. {ECO:0000269 PubMed:20375010}.                                                                                                                                                                                                                                                                                                                                                                                                                                                                                                                                                                                                                                                                                                                                                                                                                                      |
| Acetyl-CoA acetyltransferase, mitochondrial                  | P24752  | ACAT1   | Mitochondrion.                                                                                                                                                                                                                                                                                                                                                                                                                                                                                                                                                                                                                                                                                                                                                                                                                                                                                                                                                                                                                                                                                                                                                                                                                                                                     |
| Transmembrane protein 143                                    | Q96AN5  | TMEM143 | Membrane {ECO:0000305}; Multi-pass membrane protein {ECO:0000305}.                                                                                                                                                                                                                                                                                                                                                                                                                                                                                                                                                                                                                                                                                                                                                                                                                                                                                                                                                                                                                                                                                                                                                                                                                 |
| Nesprin-2                                                    | Q8WXH0  | SYNE2   | Nucleus outer membrane {ECO:0000305}; Single-pass type IV membrane protein {ECO:0000305}; Cytoplasmic side {ECO:0000305}. Sarcoplasmic reticulum membrane {ECO:0000305 PubMed:15671068}; Single-pass type IV membrane protein {ECO:0000305}. Cell membrane {ECO:0000305}; Single-pass membrane protein {ECO:0000305}. Cytoplasm, cytoskeleton. Mitochondrion. Nucleus, nucleoplasm. Cytoplasm, myofibril, sarcomere, Z line {ECO:0000305 PubMed:15671068}. Note=Different isoform patterns are found in the different compartments of the cell. The isoforms having the C-terminal transmembrane span can be found in several organellar membranes like the nuclear envelope, the sarcoplasmic reticulum of myoblasts, or the lamellipodia and focal adhesions at the cell membrane. The largest part of the outer nuclear membrane-associated protein is cytoplasmic, while its C-terminal part is associated with the nuclear envelope, most probably the outer nuclear membrane. Remains associated with the nuclear envelope during its breakdown in mitotic cells. Shorter soluble isoforms can be found in the cytoplasm and within the nucleus.; Isoform 8: Cell junction, focal adhesion {ECO:0000269 PubMed:22768332}. Note=In U2OS cells. {ECO:0000269 PubMed:22768332}. |
| NADH dehydrogenase [ubiquinone] 1 beta subcomplex subunit 10 | O96000  | NDUFB10 | Mitochondrion inner membrane {ECO:0000305 PubMed:12611891}; Peripheral membrane protein {ECO:0000305}; Matrix side {ECO:0000305}.                                                                                                                                                                                                                                                                                                                                                                                                                                                                                                                                                                                                                                                                                                                                                                                                                                                                                                                                                                                                                                                                                                                                                  |

**Supplemental Table 1 Page 40. All proteins quantitated in study**

| Protein Name                                           | Uniprot | Gene    | Subcellular localization                                                                                                                                                                                                                                                                                                                                                                                                                                                                                                                                                                                                                                                                                                             |
|--------------------------------------------------------|---------|---------|--------------------------------------------------------------------------------------------------------------------------------------------------------------------------------------------------------------------------------------------------------------------------------------------------------------------------------------------------------------------------------------------------------------------------------------------------------------------------------------------------------------------------------------------------------------------------------------------------------------------------------------------------------------------------------------------------------------------------------------|
| Histone-lysine N-methyltransferase<br>SMYD1            | Q8NB12  | SMYD1   | Cytoplasm {ECO:0000250}. Nucleus {ECO:0000250}.                                                                                                                                                                                                                                                                                                                                                                                                                                                                                                                                                                                                                                                                                      |
| Ras-related protein Rab-2A                             | P61019  | RAB2A   | Endoplasmic reticulum-Golgi intermediate compartment membrane {ECO:0000269 PubMed:17081065}; Lipid-anchor {ECO:0000269 PubMed:17081065}. Melanosome {ECO:0000269 PubMed:17081065}. Endoplasmic reticulum membrane {ECO:0000305}; Lipid-anchor {ECO:0000305}. Golgi apparatus membrane {ECO:0000305}; Lipid-anchor {ECO:0000305}. Note=Identified by mass spectrometry in melanosome fractions from stage I to stage IV.                                                                                                                                                                                                                                                                                                              |
| L-2-hydroxyglutarate dehydrogenase,<br>mitochondrial   | Q9H9P8  | L2HGDH  | Mitochondrion {ECO:0000269 PubMed:16005139}.                                                                                                                                                                                                                                                                                                                                                                                                                                                                                                                                                                                                                                                                                         |
| Long-chain fatty acid transport<br>protein 1           | Q6PCB7  | SLC27A1 | Cell membrane {ECO:0000250 UniProtKB:Q60714}; Single-pass membrane protein {ECO:0000250 UniProtKB:Q60714}. Endomembrane system {ECO:0000250 UniProtKB:Q60714}; Single-pass membrane protein {ECO:0000250 UniProtKB:Q60714}. Cytoplasm {ECO:0000250 UniProtKB:Q60714}. Note=Plasma membrane and intracellular membranes, at least in adipocytes. In adipocytes, but not myocytes, insulin via the mTORC1 signaling pathway induces a rapid translocation of SLC27A1 from intracellular compartments to the plasma membrane, paralleled by increased LCFA uptake. Insulin-dependent translocation from the cytoplasm to the cell membrane is regulated by EPRS. Predominantly cytoplasmic in myocytes. {ECO:0000250 UniProtKB:Q60714}. |
| Serum albumin                                          | P02768  | ALB     | Secreted.                                                                                                                                                                                                                                                                                                                                                                                                                                                                                                                                                                                                                                                                                                                            |
| Dehydrogenase/reductase SDR family<br>member 7B        | Q6IAN0  | DHRS7B  | Endoplasmic reticulum membrane {ECO:0000250}; Single-pass type II membrane protein {ECO:0000250}.                                                                                                                                                                                                                                                                                                                                                                                                                                                                                                                                                                                                                                    |
| Mitochondrial import receptor subunit<br>TOM40 homolog | O96008  | TOMM40  | Mitochondrion outer membrane {ECO:0000269 PubMed:15644312}; Multi-pass membrane protein {ECO:0000255}.                                                                                                                                                                                                                                                                                                                                                                                                                                                                                                                                                                                                                               |

**Supplemental Table 1 Page 41. All proteins quantitated in study**

| Protein Name                                                            | Uniprot | Gene     | Subcellular localization                                                                                                                                                                                                                                                                                                                                                                                                                                                                                                                                                                                                                                                                                                                                                                                                                                                                                                                                                                                                                                                                                                                                                                                                                                                                                                                                                                                                                                                                                                                                                                                                                                                                                                                                                                                                                                                                                                                  |
|-------------------------------------------------------------------------|---------|----------|-------------------------------------------------------------------------------------------------------------------------------------------------------------------------------------------------------------------------------------------------------------------------------------------------------------------------------------------------------------------------------------------------------------------------------------------------------------------------------------------------------------------------------------------------------------------------------------------------------------------------------------------------------------------------------------------------------------------------------------------------------------------------------------------------------------------------------------------------------------------------------------------------------------------------------------------------------------------------------------------------------------------------------------------------------------------------------------------------------------------------------------------------------------------------------------------------------------------------------------------------------------------------------------------------------------------------------------------------------------------------------------------------------------------------------------------------------------------------------------------------------------------------------------------------------------------------------------------------------------------------------------------------------------------------------------------------------------------------------------------------------------------------------------------------------------------------------------------------------------------------------------------------------------------------------------------|
| Synaptopodin-2                                                          | Q9UMS6  | SYNPO2   | Nucleus {ECO:0000250 UniProtKB:Q91YE8}. Cytoplasm {ECO:0000250 UniProtKB:Q91YE8}. Cytoplasm, cytoskeleton {ECO:0000269 PubMed:24005909}. Cytoplasm, myofibril, sarcomere, Z line {ECO:0000269 PubMed:20554076}. Cell junction, focal adhesion {ECO:0000269 PubMed:20554076}. Note=Shuttles between the nucleus and the cytoplasm in a differentiation-dependent and stress-induced fashion. In undifferentiated myoblasts strongly expressed in the nucleus, after induction of myotube differentiation is located to both nucleus and cytoplasm along acting filaments, and in differentiated myotubes is located at the Z lines. Upon stress redistributes from cytoplasm of myoblasts and myotubes to the nucleus. Nuclear import is KPNA2-dependent and promoted by phosphorylation by PKA and/or CaMK2, and inhibition of calcineurin. The nuclear export is XPO1-dependent (By similarity). Localized in a fiber-like pattern, partly overlapping with filamentous actin (PubMed:18371299). {ECO:0000250 UniProtKB:Q91YE8, ECO:0000269 PubMed:18371299}.; Isoform 1: Cytoplasm, cytoskeleton {ECO:0000269 PubMed:24005909}. Note=Localizes to induced actin bundles with contiguous staining. {ECO:0000269 PubMed:24005909}.; Isoform 2: Cytoplasm, cytoskeleton {ECO:0000269 PubMed:24005909}. Note=Localizes to induced actin bundles with punctuate staining. {ECO:0000269 PubMed:24005909}.; Isoform 3: Cytoplasm, cytoskeleton {ECO:0000269 PubMed:24005909}. Note=Localizes to induced irregular actin bundles with contiguous and punctuated staining. {ECO:0000269 PubMed:24005909}.; Isoform 4: Cytoplasm, cytoskeleton {ECO:0000269 PubMed:24005909}. Note=Localizes to induced actin bundles with punctuate staining. {ECO:0000269 PubMed:24005909}.; Isoform 5: Cytoplasm, cytoskeleton {ECO:0000269 PubMed:24005909}. Note=Localizes to induced actin bundles with contiguous staining. {ECO:0000269 PubMed:24005909}. |
| Lamin-B2                                                                | Q03252  | LMNB2    | Nucleus inner membrane; Lipid-anchor; Nucleoplasmic side.                                                                                                                                                                                                                                                                                                                                                                                                                                                                                                                                                                                                                                                                                                                                                                                                                                                                                                                                                                                                                                                                                                                                                                                                                                                                                                                                                                                                                                                                                                                                                                                                                                                                                                                                                                                                                                                                                 |
| CDGSH iron-sulfur domain-containing protein 1                           | Q9NZ45  | CISD1    | Mitochondrion outer membrane {ECO:0000269 PubMed:17376863, ECO:0000269 PubMed:17766439, ECO:0000269 PubMed:17905743, ECO:0000269 PubMed:18047834}; Single-pass type III membrane protein {ECO:0000269 PubMed:17376863, ECO:0000269 PubMed:17766439, ECO:0000269 PubMed:17905743, ECO:0000269 PubMed:18047834}.                                                                                                                                                                                                                                                                                                                                                                                                                                                                                                                                                                                                                                                                                                                                                                                                                                                                                                                                                                                                                                                                                                                                                                                                                                                                                                                                                                                                                                                                                                                                                                                                                            |
| Glycophorin-A                                                           | P02724  | GYPA     | Cell membrane {ECO:0000269 PubMed:11402026}; Single-pass type I membrane protein {ECO:0000269 PubMed:11402026}. Note=Appears to be colocalized with SLC4A1.                                                                                                                                                                                                                                                                                                                                                                                                                                                                                                                                                                                                                                                                                                                                                                                                                                                                                                                                                                                                                                                                                                                                                                                                                                                                                                                                                                                                                                                                                                                                                                                                                                                                                                                                                                               |
| NLR family member X1                                                    | Q86UT6  | NLRX1    | Mitochondrion outer membrane {ECO:0000269 PubMed:18200010, ECO:0000269 PubMed:18219313, ECO:0000269 PubMed:27393910}.                                                                                                                                                                                                                                                                                                                                                                                                                                                                                                                                                                                                                                                                                                                                                                                                                                                                                                                                                                                                                                                                                                                                                                                                                                                                                                                                                                                                                                                                                                                                                                                                                                                                                                                                                                                                                     |
| 3-hydroxyacyl-CoA dehydrogenase type-2                                  | Q99714  | HSD17B10 | Mitochondrion {ECO:0000269 PubMed:12917011, ECO:0000269 PubMed:18984158}.                                                                                                                                                                                                                                                                                                                                                                                                                                                                                                                                                                                                                                                                                                                                                                                                                                                                                                                                                                                                                                                                                                                                                                                                                                                                                                                                                                                                                                                                                                                                                                                                                                                                                                                                                                                                                                                                 |
| Succinate dehydrogenase [ubiquinone] iron-sulfur subunit, mitochondrial | P21912  | SDHB     | Mitochondrion inner membrane; Peripheral membrane protein; Matrix side.                                                                                                                                                                                                                                                                                                                                                                                                                                                                                                                                                                                                                                                                                                                                                                                                                                                                                                                                                                                                                                                                                                                                                                                                                                                                                                                                                                                                                                                                                                                                                                                                                                                                                                                                                                                                                                                                   |

**Supplemental Table 1 Page 42. All proteins quantitated in study**

| Protein Name                                                     | Uniprot | Gene    | Subcellular localization                                                                                                                                                                                                                                                                                                                                                                                                                                                                                                                                                                          |
|------------------------------------------------------------------|---------|---------|---------------------------------------------------------------------------------------------------------------------------------------------------------------------------------------------------------------------------------------------------------------------------------------------------------------------------------------------------------------------------------------------------------------------------------------------------------------------------------------------------------------------------------------------------------------------------------------------------|
| Myosin regulatory light chain 2, skeletal muscle isoform         | Q96A32  | MYLPF   | 0                                                                                                                                                                                                                                                                                                                                                                                                                                                                                                                                                                                                 |
| NADH-ubiquinone oxidoreductase chain 4                           | P03905  | MT-ND4  | Mitochondrion membrane {ECO:0000250}; Multi-pass membrane protein {ECO:0000250}.                                                                                                                                                                                                                                                                                                                                                                                                                                                                                                                  |
| Fermitin family homolog 2                                        | Q96AC1  | FERMT2  | Cytoplasm. Cytoplasm, cell cortex. Cytoplasm, cytoskeleton. Cytoplasm, cytoskeleton, stress fiber. Cell junction, focal adhesion. Membrane; Peripheral membrane protein; Cytoplasmic side. Cell projection, lamellipodium membrane; Peripheral membrane protein; Cytoplasmic side. Nucleus. Cytoplasm, myofibril, sarcomere, I band {ECO:0000250}. Cell surface {ECO:0000250}. Note=Colocalizes with actin stress fibers at cell-ECM focal adhesion sites. Colocalizes with ITGB3 at lamellipodia at the leading edge of spreading cells. Binds to membranes that contain phosphatidylinositides. |
| Plasma membrane calcium-transporting ATPase 1                    | P20020  | ATP2B1  | Cell membrane {ECO:0000269 PubMed:18029012}; Multi-pass membrane protein {ECO:0000255}. Basolateral cell membrane {ECO:0000250 UniProtKB:G5E829}. Cell junction, synapse {ECO:0000250 UniProtKB:G5E829}. Note=Colocalizes with SV2A in photoreceptor synaptic terminals. Colocalizes with NPTN to the immunological synapse. Colocalizes with EPB41 to the basolateral membrane in enterocyte. {ECO:0000250 UniProtKB:G5E829}.                                                                                                                                                                    |
| Sarcoplasmic reticulum histidine-rich calcium-binding protein    | P23327  | HRC     | Sarcoplasmic reticulum lumen.                                                                                                                                                                                                                                                                                                                                                                                                                                                                                                                                                                     |
| Guanine nucleotide-binding protein G(I)/G(S)/G(T) subunit beta-1 | P62873  | GNB1    | 0                                                                                                                                                                                                                                                                                                                                                                                                                                                                                                                                                                                                 |
| Isoleucine--tRNA ligase, mitochondrial                           | Q9NSE4  | IARS2   | Mitochondrion matrix {ECO:0000250}.                                                                                                                                                                                                                                                                                                                                                                                                                                                                                                                                                               |
| Enoyl-CoA hydratase, mitochondrial                               | P30084  | ECHS1   | Mitochondrion matrix.                                                                                                                                                                                                                                                                                                                                                                                                                                                                                                                                                                             |
| 28S ribosomal protein S18b, mitochondrial                        | Q9Y676  | MRPS18B | Mitochondrion {ECO:0000269 PubMed:25838379}.                                                                                                                                                                                                                                                                                                                                                                                                                                                                                                                                                      |
| Protein-cysteine N-palmitoyltransferase HHAT-like protein        | Q9HCP6  | HHATL   | Endoplasmic reticulum membrane {ECO:0000250}; Multi-pass membrane protein {ECO:0000250}.                                                                                                                                                                                                                                                                                                                                                                                                                                                                                                          |
| NADH dehydrogenase [ubiquinone] 1 alpha subcomplex subunit 12    | Q9UI09  | NDUFA12 | Mitochondrion inner membrane {ECO:0000305 PubMed:12611891}; Peripheral membrane protein {ECO:0000255}; Matrix side {ECO:0000305}.                                                                                                                                                                                                                                                                                                                                                                                                                                                                 |
| F-actin-capping protein subunit alpha-2                          | P47755  | CAPZA2  | 0                                                                                                                                                                                                                                                                                                                                                                                                                                                                                                                                                                                                 |
| Coiled-coil-helix-coiled-coil-helix domain-containing protein 2  | Q9Y6H1  | CHCHD2  | Nucleus {ECO:0000269 PubMed:23303788}. Mitochondrion {ECO:0000269 PubMed:25662902}. Mitochondrion intermembrane space {ECO:0000269 PubMed:25662902}. Note=Mainly localised in the intermembrane space. {ECO:0000269 PubMed:25662902}.                                                                                                                                                                                                                                                                                                                                                             |

**Supplemental Table 1 Page 43. All proteins quantitated in study**

| Protein Name                                                        | Uniprot | Gene     | Subcellular localization                                                                                                                                                                                                                                                                                                                                                                                                                                                                                                                                                                                                                                                                                                                                                                                                            |
|---------------------------------------------------------------------|---------|----------|-------------------------------------------------------------------------------------------------------------------------------------------------------------------------------------------------------------------------------------------------------------------------------------------------------------------------------------------------------------------------------------------------------------------------------------------------------------------------------------------------------------------------------------------------------------------------------------------------------------------------------------------------------------------------------------------------------------------------------------------------------------------------------------------------------------------------------------|
| 40S ribosomal protein S4, X isoform                                 | P62701  | RPS4X    | Cytoplasm {ECO:0000269 PubMed:17289661}. Note=Localized in cytoplasmic mRNP granules containing untranslated mRNAs.                                                                                                                                                                                                                                                                                                                                                                                                                                                                                                                                                                                                                                                                                                                 |
| Guanine nucleotide-binding protein G(s) subunit alpha isoforms XLas | Q5JWF2  | GNAS     | Cell membrane {ECO:0000269 PubMed:27120771}; Peripheral membrane protein {ECO:0000250 UniProtKB:Q63803}. Apical cell membrane {ECO:0000269 PubMed:27120771}.                                                                                                                                                                                                                                                                                                                                                                                                                                                                                                                                                                                                                                                                        |
| Alpha-actinin-3                                                     | Q08043  | ACTN3    | 0                                                                                                                                                                                                                                                                                                                                                                                                                                                                                                                                                                                                                                                                                                                                                                                                                                   |
| Importin subunit alpha-4                                            | O00505  | KPNA3    | Cytoplasm {ECO:0000250}. Nucleus {ECO:0000250}.                                                                                                                                                                                                                                                                                                                                                                                                                                                                                                                                                                                                                                                                                                                                                                                     |
| Heat shock protein HSP 90-beta                                      | P08238  | HSP90AB1 | Cytoplasm {ECO:0000269 PubMed:16580629, ECO:0000269 PubMed:18239673, ECO:0000269 PubMed:24880080, ECO:0000269 PubMed:9482106}. Melanosome {ECO:0000269 PubMed:17081065}. Nucleus {ECO:0000269 PubMed:18239673}. Secreted {ECO:0000269 PubMed:20599762}. Cell membrane {ECO:0000269 PubMed:20599762}. Note=Identified by mass spectrometry in melanosome fractions from stage I to stage IV (PubMed:17081065). Translocates with BIRC2 from the nucleus to the cytoplasm during differentiation (PubMed:18239673). Secreted when associated with TGFB1 processed form (LAP) (PubMed:20599762). {ECO:0000269 PubMed:17081065, ECO:0000269 PubMed:18239673, ECO:0000269 PubMed:20599762}.                                                                                                                                              |
| COP9 signalosome complex subunit 4                                  | Q9BT78  | COPS4    | Cytoplasm. Nucleus. Cytoplasmic vesicle, secretory vesicle, synaptic vesicle.                                                                                                                                                                                                                                                                                                                                                                                                                                                                                                                                                                                                                                                                                                                                                       |
| ATPase family AAA domain-containing protein 3A                      | Q9NVI7  | ATAD3A   | Mitochondrion inner membrane {ECO:0000269 PubMed:18063578, ECO:0000269 PubMed:20154147, ECO:0000269 PubMed:20332122, ECO:0000269 PubMed:20349121}; Single-pass membrane protein {ECO:0000269 PubMed:20154147, ECO:0000269 PubMed:20349121}. Mitochondrion matrix, mitochondrion nucleoid {ECO:0000269 PubMed:17210950, ECO:0000269 PubMed:18063578}. Note=In the mitochondrial inner membrane, enriched in sites with the potential to form contacts with the outer membrane (PubMed:20349121, PubMed:20154147). The N-terminal domain interacts with the inner surface of the mitochondrial outer membrane and the C-terminal domain localizes in a specific matrix compartment, where it is associated with nucleoids (PubMed:18063578). {ECO:0000269 PubMed:18063578, ECO:0000269 PubMed:20154147, ECO:0000269 PubMed:20349121}. |
| NADH-ubiquinone oxidoreductase 75 kDa subunit, mitochondrial        | P28331  | NDUFS1   | Mitochondrion inner membrane.                                                                                                                                                                                                                                                                                                                                                                                                                                                                                                                                                                                                                                                                                                                                                                                                       |
| Pre-B-cell leukemia transcription factor-interacting protein 1      | Q96AQ6  | PBXIP1   | Cytoplasm, cytoskeleton {ECO:0000269 PubMed:12360403, ECO:0000269 PubMed:17043237}. Nucleus {ECO:0000269 PubMed:10825160, ECO:0000269 PubMed:12360403}. Note=Shuttles between the nucleus and the cytosol (PubMed:12360403). Mainly localized in the cytoplasm, associated with microtubules (PubMed:10825160, PubMed:12360403). Detected in small amounts in the nucleus (PubMed:10825160).                                                                                                                                                                                                                                                                                                                                                                                                                                        |
| L-xylulose reductase                                                | Q7Z4W1  | DCXR     | Membrane {ECO:0000250}; Peripheral membrane protein {ECO:0000250}. Note=Probably recruited to membranes via an interaction with phosphatidylinositol. {ECO:0000250}.                                                                                                                                                                                                                                                                                                                                                                                                                                                                                                                                                                                                                                                                |

**Supplemental Table 1 Page 44. All proteins quantitated in study**

| Protein Name                                                            | Uniprot | Gene   | Subcellular localization                                                                                                                                                                                                                                                                                                                                                                                                                                                                                                                                                                                                                                                                                                       |
|-------------------------------------------------------------------------|---------|--------|--------------------------------------------------------------------------------------------------------------------------------------------------------------------------------------------------------------------------------------------------------------------------------------------------------------------------------------------------------------------------------------------------------------------------------------------------------------------------------------------------------------------------------------------------------------------------------------------------------------------------------------------------------------------------------------------------------------------------------|
| Malate dehydrogenase, mitochondrial                                     | P40926  | MDH2   | Mitochondrion matrix {ECO:0000250 UniProtKB:P04636}.                                                                                                                                                                                                                                                                                                                                                                                                                                                                                                                                                                                                                                                                           |
| NADH dehydrogenase [ubiquinone] iron-sulfur protein 8, mitochondrial    | O00217  | NDUFS8 | Mitochondrion {ECO:0000305}.                                                                                                                                                                                                                                                                                                                                                                                                                                                                                                                                                                                                                                                                                                   |
| Isochorismatase domain-containing protein 2                             | Q96AB3  | ISOC2  | Cytoplasm {ECO:0000269 PubMed:17658461}. Nucleus {ECO:0000269 PubMed:17658461}. Note=Localizes to the nucleus in the presence of CDKN2A.                                                                                                                                                                                                                                                                                                                                                                                                                                                                                                                                                                                       |
| Hydroxymethylglutaryl-CoA lyase, mitochondrial                          | P35914  | HMGCL  | Mitochondrion matrix. Peroxisome. Note=Unprocessed form is peroxisomal.                                                                                                                                                                                                                                                                                                                                                                                                                                                                                                                                                                                                                                                        |
| NADH-ubiquinone oxidoreductase chain 2                                  | P03891  | MT-ND2 | Mitochondrion inner membrane; Multi-pass membrane protein.                                                                                                                                                                                                                                                                                                                                                                                                                                                                                                                                                                                                                                                                     |
| Prolactin regulatory element-binding protein                            | Q9HCU5  | PREB   | Endoplasmic reticulum membrane {ECO:0000250 UniProtKB:Q9WTV0}; Single-pass membrane protein {ECO:0000250 UniProtKB:Q9WTV0}. Nucleus {ECO:0000250 UniProtKB:Q9WTV0}. Note=Concentrates at endoplasmic reticulum exit sites (ERES), also known as transitional endoplasmic reticulum (tER). {ECO:0000269 PubMed:25202031, ECO:0000269 PubMed:28442536}.                                                                                                                                                                                                                                                                                                                                                                          |
| Myoglobin                                                               | P02144  | MB     | 0                                                                                                                                                                                                                                                                                                                                                                                                                                                                                                                                                                                                                                                                                                                              |
| Calcium uptake protein 1, mitochondrial                                 | Q9BPX6  | MICU1  | Mitochondrion inner membrane {ECO:0000269 PubMed:20693986, ECO:0000269 PubMed:24332854, ECO:0000269 PubMed:26387864, ECO:0000269 PubMed:26774479, ECO:0000269 PubMed:27099988, ECO:0000305 PubMed:24231807}; Single-pass membrane protein {ECO:0000255}. Mitochondrion intermembrane space {ECO:0000269 PubMed:23747253, ECO:0000269 PubMed:24560927, ECO:0000269 PubMed:26387864}.                                                                                                                                                                                                                                                                                                                                            |
| Electron transfer flavoprotein-ubiquinone oxidoreductase, mitochondrial | Q16134  | ETFDH  | Mitochondrion inner membrane.                                                                                                                                                                                                                                                                                                                                                                                                                                                                                                                                                                                                                                                                                                  |
| Vinculin                                                                | P18206  | VCL    | Cell membrane {ECO:0000250 UniProtKB:P12003}; Peripheral membrane protein {ECO:0000250 UniProtKB:P12003}; Cytoplasmic side {ECO:0000250 UniProtKB:P12003}. Cell junction, adherens junction {ECO:0000250 UniProtKB:P12003}. Cell junction, focal adhesion {ECO:0000250 UniProtKB:P12003}. Cytoplasm, cytoskeleton {ECO:0000250 UniProtKB:P85972}. Cell membrane, sarcolemma {ECO:0000250 UniProtKB:Q64727}; Peripheral membrane protein {ECO:0000250 UniProtKB:Q64727}; Cytoplasmic side {ECO:0000250 UniProtKB:Q64727}. Note=Recruitment to cell-cell junctions occurs in a myosin II-dependent manner. Interaction with CTNNB1 is necessary for its localization to the cell-cell junctions. {ECO:0000250 UniProtKB:P12003}. |

**Supplemental Table 1 Page 45. All proteins quantitated in study**

| Protein Name                                                             | Uniprot | Gene    | Subcellular localization                                                                                                                                                                                                                                                                                                                                                           |
|--------------------------------------------------------------------------|---------|---------|------------------------------------------------------------------------------------------------------------------------------------------------------------------------------------------------------------------------------------------------------------------------------------------------------------------------------------------------------------------------------------|
| Mitochondrial antiviral-signaling protein                                | Q7Z434  | MAVS    | Mitochondrion outer membrane {ECO:0000269 PubMed:16125763}. Mitochondrion {ECO:0000269 PubMed:11780052, ECO:0000269 PubMed:17709747}. Peroxisome {ECO:0000269 PubMed:20451243}.                                                                                                                                                                                                    |
| Glucosidase 2 subunit beta                                               | P14314  | PRKCSH  | Endoplasmic reticulum {ECO:0000255 PROSITE-ProRule:PRU10138, ECO:0000305 PubMed:10929008}.                                                                                                                                                                                                                                                                                         |
| Keratin, type I cytoskeletal 9                                           | P35527  | KRT9    | 0                                                                                                                                                                                                                                                                                                                                                                                  |
| Myosin-7B                                                                | A7E2Y1  | MYH7B   | Membrane {ECO:0000269 PubMed:15755502}; Peripheral membrane protein {ECO:0000269 PubMed:15755502}.                                                                                                                                                                                                                                                                                 |
| Alanine aminotransferase 2                                               | Q8TD30  | GPT2    | 0                                                                                                                                                                                                                                                                                                                                                                                  |
| Isocitrate dehydrogenase [NAD] subunit gamma, mitochondrial              | P51553  | IDH3G   | Mitochondrion {ECO:0000269 PubMed:11256614}.                                                                                                                                                                                                                                                                                                                                       |
| Enoyl-CoA delta isomerase 2, mitochondrial                               | O75521  | ECI2    | Isoform 1: Mitochondrion {ECO:0000250}.; Isoform 2: Peroxisome matrix.                                                                                                                                                                                                                                                                                                             |
| Enoyl-[acyl-carrier-protein] reductase, mitochondrial                    | Q9BV79  | MECR    | Isoform 1: Mitochondrion {ECO:0000269 PubMed:12654921}.; Isoform 2: Cytoplasm {ECO:0000269 PubMed:25031892}. Nucleus {ECO:0000269 PubMed:25031892}.                                                                                                                                                                                                                                |
| Ankyrin repeat domain-containing protein 2                               | Q9GZV1  | ANKRD2  | Cytoplasm, myofibril, sarcomere, I band {ECO:0000250}. Cytoplasm, cytosol. Nucleus. Nucleus, PML body. Note=In the sarcoplasm of differentiated striated muscle cells, where it is cytosolic and enriched in the I band. In nucleus and PML bodies of proliferating and undifferentiated myoblasts. Associates with the euchromatin in the nucleus of myocytes upon muscle stress. |
| Cytochrome c oxidase subunit NDUF4A                                      | O00483  | NDUFA4  | Mitochondrion inner membrane {ECO:0000269 PubMed:23746447}; Peripheral membrane protein {ECO:0000269 PubMed:23746447}; Matrix side {ECO:0000269 PubMed:23746447}.                                                                                                                                                                                                                  |
| Trimeric intracellular cation channel type A                             | Q9H6F2  | TMEM38A | Sarcoplasmic reticulum membrane {ECO:0000250 UniProtKB:A5A6S6}; Multi-pass membrane protein {ECO:0000250 UniProtKB:A5A6S6}. Nucleus membrane {ECO:0000250 UniProtKB:A5A6S6}.                                                                                                                                                                                                       |
| Voltage-dependent L-type calcium channel subunit alpha-1S                | Q13698  | CACNA1S | Cell membrane, sarcolemma, T-tubule {ECO:0000250 UniProtKB:P07293}; Multi-pass membrane protein {ECO:0000250 UniProtKB:P07293}.                                                                                                                                                                                                                                                    |
| F-actin-capping protein subunit beta                                     | P47756  | CAPZB   | Cytoplasm, cytoskeleton {ECO:0000250}. Cytoplasm, myofibril, sarcomere {ECO:0000250}.                                                                                                                                                                                                                                                                                              |
| Myozenin-3                                                               | Q8TDC0  | MYOZ3   | Cytoplasm, myofibril, sarcomere, Z line {ECO:0000250}. Note=Localized at the Z-line of skeletal muscle. {ECO:0000250}.                                                                                                                                                                                                                                                             |
| Cofilin-2                                                                | Q9Y281  | CFL2    | Nucleus matrix {ECO:0000250}. Cytoplasm, cytoskeleton {ECO:0000250}. Note=Colocalizes with CSPR3 in the Z line of sarcomeres. {ECO:0000269 PubMed:19752190}.                                                                                                                                                                                                                       |
| ATP-binding cassette sub-family B member 10, mitochondrial               | Q9NRK6  | ABCB10  | Mitochondrion inner membrane; Multi-pass membrane protein.                                                                                                                                                                                                                                                                                                                         |
| Dolichyl-diphosphooligosaccharide--protein glycosyltransferase subunit 2 | P04844  | RPN2    | Endoplasmic reticulum {ECO:0000250 UniProtKB:F1PCT7}. Endoplasmic reticulum membrane; Multi-pass membrane protein {ECO:0000305}.                                                                                                                                                                                                                                                   |

**Supplemental Table 1 Page 46. All proteins quantitated in study**

| Protein Name                                                                                               | Uniprot | Gene            | Subcellular localization                                                                                                                                                                                                                         |
|------------------------------------------------------------------------------------------------------------|---------|-----------------|--------------------------------------------------------------------------------------------------------------------------------------------------------------------------------------------------------------------------------------------------|
| Voltage-dependent calcium channel gamma-1 subunit                                                          | Q06432  | CACNG1          | Cell membrane, sarcolemma {ECO:0000250 UniProtKB:P19518}; Multi-pass membrane protein {ECO:0000250 UniProtKB:P19518}.                                                                                                                            |
| Elongation factor 2                                                                                        | P13639  | EEF2            | Cytoplasm {ECO:0000269 PubMed:25064856}. Nucleus {ECO:0000269 PubMed:24648518}. Note=Phosphorylation by CSK promotes cleavage and SUMOylation-dependent nuclear translocation of the C-terminal cleavage product. {ECO:0000269 PubMed:24648518}. |
| Lipoamide acyltransferase component of branched-chain alpha-keto acid dehydrogenase complex, mitochondrial | P11182  | DBT             | Mitochondrion matrix.                                                                                                                                                                                                                            |
| Annexin A6                                                                                                 | P08133  | ANXA6           | Cytoplasm {ECO:0000250}. Melanosome {ECO:0000269 PubMed:17081065}. Note=Identified by mass spectrometry in melanosome fractions from stage I to stage IV.                                                                                        |
| Fat storage-inducing transmembrane protein 1                                                               | A5D6W6  | FITM1           | Endoplasmic reticulum membrane {ECO:0000269 PubMed:18160536}; Multi-pass membrane protein {ECO:0000269 PubMed:18160536}.                                                                                                                         |
| Sepiapterin reductase                                                                                      | P35270  | SPR             | Cytoplasm.                                                                                                                                                                                                                                       |
| Phosphatidylethanolamine-binding protein 1                                                                 | P30086  | PEBP1           | Cytoplasm {ECO:0000250}.                                                                                                                                                                                                                         |
| ATPase family AAA domain-containing protein 1                                                              | Q8NBU5  | ATAD1           | Peroxisome {ECO:0000250 UniProtKB:Q9D5T0}. Cell junction, synapse, postsynaptic cell membrane {ECO:0000250 UniProtKB:Q9D5T0}.                                                                                                                    |
| Protein NipSnap homolog 3B                                                                                 | Q9BS92  | NIPSNAP3B       | 0                                                                                                                                                                                                                                                |
| Prenylcysteine oxidase 1                                                                                   | Q9UHG3  | PCYOX1          | Lysosome.                                                                                                                                                                                                                                        |
| Cytochrome c oxidase subunit 6A2, mitochondrial                                                            | Q02221  | COX6A2          | Mitochondrion inner membrane.                                                                                                                                                                                                                    |
| 39S ribosomal protein L37, mitochondrial                                                                   | Q9BZE1  | MRPL37          | Mitochondrion {ECO:0000269 PubMed:25278503, ECO:0000269 PubMed:25838379, ECO:0000269 PubMed:28892042}.                                                                                                                                           |
| Histone H3.3                                                                                               | P84243  | H3F3A;<br>H3F3B | Nucleus. Chromosome.                                                                                                                                                                                                                             |
| 40S ribosomal protein S2                                                                                   | P15880  | RPS2            | 0                                                                                                                                                                                                                                                |
| D-2-hydroxyglutarate dehydrogenase, mitochondrial                                                          | Q8N465  | D2HGDH          | Mitochondrion {ECO:0000305 PubMed:15070399}.                                                                                                                                                                                                     |
| Histone H1.2                                                                                               | P16403  | HIST1H1C        | Nucleus. Chromosome. Note=Mainly localizes in euchromatin. Distribution goes in parallel with DNA concentration.                                                                                                                                 |
| Sarcoplasmic/endoplasmic reticulum calcium ATPase 2                                                        | P16615  | ATP2A2          | Endoplasmic reticulum membrane {ECO:0000250 UniProtKB:O55143}; Multi-pass membrane protein {ECO:0000255}. Sarcoplasmic reticulum membrane {ECO:0000250 UniProtKB:O55143}; Multi-pass membrane protein {ECO:0000255}.                             |
| Glutaryl-CoA dehydrogenase, mitochondrial                                                                  | Q92947  | GCDH            | Mitochondrion matrix.                                                                                                                                                                                                                            |

**Supplemental Table 1 Page 47. All proteins quantitated in study**

| Protein Name                                        | Uniprot | Gene    | Subcellular localization                                                                                                                                                                                                                                                                                                                                                                                                                                                                                                                                                                                                                                                                                                                                                                                                                                                                                                                                                                                                                                                                                                                                                                                                                                                                              |
|-----------------------------------------------------|---------|---------|-------------------------------------------------------------------------------------------------------------------------------------------------------------------------------------------------------------------------------------------------------------------------------------------------------------------------------------------------------------------------------------------------------------------------------------------------------------------------------------------------------------------------------------------------------------------------------------------------------------------------------------------------------------------------------------------------------------------------------------------------------------------------------------------------------------------------------------------------------------------------------------------------------------------------------------------------------------------------------------------------------------------------------------------------------------------------------------------------------------------------------------------------------------------------------------------------------------------------------------------------------------------------------------------------------|
| Cytochrome b-c1 complex subunit 1, mitochondrial    | P31930  | UQCRC1  | Mitochondrion inner membrane.                                                                                                                                                                                                                                                                                                                                                                                                                                                                                                                                                                                                                                                                                                                                                                                                                                                                                                                                                                                                                                                                                                                                                                                                                                                                         |
| AFG3-like protein 2                                 | Q9Y4W6  | AFG3L2  | Mitochondrion {ECO:0000269 PubMed:10395799}. Mitochondrion inner membrane {ECO:0000250 UniProtKB:Q8JZQ2}; Multi-pass membrane protein {ECO:0000255}.                                                                                                                                                                                                                                                                                                                                                                                                                                                                                                                                                                                                                                                                                                                                                                                                                                                                                                                                                                                                                                                                                                                                                  |
| Voltage-dependent anion-selective channel protein 2 | P45880  | VDAC2   | Mitochondrion outer membrane {ECO:0000269 PubMed:7539795}.                                                                                                                                                                                                                                                                                                                                                                                                                                                                                                                                                                                                                                                                                                                                                                                                                                                                                                                                                                                                                                                                                                                                                                                                                                            |
| Cytochrome c oxidase subunit 1                      | P00395  | MT-CO1  | Mitochondrion inner membrane; Multi-pass membrane protein.                                                                                                                                                                                                                                                                                                                                                                                                                                                                                                                                                                                                                                                                                                                                                                                                                                                                                                                                                                                                                                                                                                                                                                                                                                            |
| Elongation factor Ts, mitochondrial                 | P43897  | TSMF    | Mitochondrion.                                                                                                                                                                                                                                                                                                                                                                                                                                                                                                                                                                                                                                                                                                                                                                                                                                                                                                                                                                                                                                                                                                                                                                                                                                                                                        |
| Saccharopine dehydrogenase-like oxidoreductase      | Q8NBX0  | SCCPDH  | 0                                                                                                                                                                                                                                                                                                                                                                                                                                                                                                                                                                                                                                                                                                                                                                                                                                                                                                                                                                                                                                                                                                                                                                                                                                                                                                     |
| Amine oxidase [flavin-containing] B                 | P27338  | MAOB    | Mitochondrion outer membrane; Single-pass type IV membrane protein; Cytoplasmic side.                                                                                                                                                                                                                                                                                                                                                                                                                                                                                                                                                                                                                                                                                                                                                                                                                                                                                                                                                                                                                                                                                                                                                                                                                 |
| 40S ribosomal protein S3                            | P23396  | RPS3    | Cytoplasm {ECO:0000269 PubMed:16314389, ECO:0000269 PubMed:17289661, ECO:0000269 PubMed:17560175, ECO:0000269 PubMed:18045535, ECO:0000269 PubMed:20217897, ECO:0000269 PubMed:21871177}. Nucleus {ECO:0000269 PubMed:17560175, ECO:0000269 PubMed:18045535, ECO:0000269 PubMed:19460357, ECO:0000269 PubMed:20217897, ECO:0000269 PubMed:21871177}. Nucleus, nucleolus {ECO:0000269 PubMed:16314389, ECO:0000269 PubMed:19460357}. Mitochondrion inner membrane {ECO:0000269 PubMed:23911537}; Peripheral membrane protein {ECO:0000269 PubMed:23911537}. Cytoplasm, cytoskeleton, spindle {ECO:0000269 PubMed:23131551}. Note=In normal cells, located mainly in the cytoplasm with small amounts in the nucleus but translocates to the nucleus in cells undergoing apoptosis (By similarity). Nuclear translocation is induced by DNA damaging agents such as hydrogen peroxide (PubMed:17560175). Accumulates in the mitochondrion in response to increased ROS levels (PubMed:23911537). Localizes to the spindle during mitosis (PubMed:23131551). Localized in cytoplasmic mRNP granules containing untranslated mRNAs (PubMed:17289661). {ECO:0000250 UniProtKB:P62908, ECO:0000269 PubMed:17289661, ECO:0000269 PubMed:17560175, ECO:0000269 PubMed:23131551, ECO:0000269 PubMed:23911537}. |
| Protein Niban                                       | Q9BZQ8  | FAM129A | Cytoplasm {ECO:0000269 PubMed:16949643}. Membrane {ECO:0000305}; Lipid-anchor {ECO:0000305}.                                                                                                                                                                                                                                                                                                                                                                                                                                                                                                                                                                                                                                                                                                                                                                                                                                                                                                                                                                                                                                                                                                                                                                                                          |
| ATP synthase subunit g, mitochondrial               | O75964  | ATP5MG  | Mitochondrion. Mitochondrion inner membrane.                                                                                                                                                                                                                                                                                                                                                                                                                                                                                                                                                                                                                                                                                                                                                                                                                                                                                                                                                                                                                                                                                                                                                                                                                                                          |
| Adenylate kinase isoenzyme 1                        | P00568  | AK1     | Cytoplasm.                                                                                                                                                                                                                                                                                                                                                                                                                                                                                                                                                                                                                                                                                                                                                                                                                                                                                                                                                                                                                                                                                                                                                                                                                                                                                            |
| Acyl-coenzyme A thioesterase 9, mitochondrial       | Q9Y305  | ACOT9   | Mitochondrion {ECO:0000250}.                                                                                                                                                                                                                                                                                                                                                                                                                                                                                                                                                                                                                                                                                                                                                                                                                                                                                                                                                                                                                                                                                                                                                                                                                                                                          |

**Supplemental Table 1 Page 48. All proteins quantitated in study**

| Protein Name                                                                   | Uniprot | Gene   | Subcellular localization                                                                                                                                                                                                                                                                                                                                                                                                                                                                                                                                                                                                                                                                                                                                                                                                                                                                                                                                                                                                                                                                                                                                                                                                                                                                                                                                                                                                                                                                                                                                                                                                                                                                                                                                                                                                                                                                                                                                                                                                                                                                                                                                                                     |
|--------------------------------------------------------------------------------|---------|--------|----------------------------------------------------------------------------------------------------------------------------------------------------------------------------------------------------------------------------------------------------------------------------------------------------------------------------------------------------------------------------------------------------------------------------------------------------------------------------------------------------------------------------------------------------------------------------------------------------------------------------------------------------------------------------------------------------------------------------------------------------------------------------------------------------------------------------------------------------------------------------------------------------------------------------------------------------------------------------------------------------------------------------------------------------------------------------------------------------------------------------------------------------------------------------------------------------------------------------------------------------------------------------------------------------------------------------------------------------------------------------------------------------------------------------------------------------------------------------------------------------------------------------------------------------------------------------------------------------------------------------------------------------------------------------------------------------------------------------------------------------------------------------------------------------------------------------------------------------------------------------------------------------------------------------------------------------------------------------------------------------------------------------------------------------------------------------------------------------------------------------------------------------------------------------------------------|
| Haloacid dehalogenase-like hydrolase domain-containing 5                       | Q9BXW7  | HDHD5  | 0                                                                                                                                                                                                                                                                                                                                                                                                                                                                                                                                                                                                                                                                                                                                                                                                                                                                                                                                                                                                                                                                                                                                                                                                                                                                                                                                                                                                                                                                                                                                                                                                                                                                                                                                                                                                                                                                                                                                                                                                                                                                                                                                                                                            |
| Integrin beta-1                                                                | P05556  | ITGB1  | Cell membrane {ECO:0000303 PubMed:10455171}; Single-pass type I membrane protein {ECO:0000255}. Cell projection, invadopodium membrane {ECO:0000269 PubMed:10455171}; Single-pass type I membrane protein {ECO:0000255}. Cell projection, ruffle membrane {ECO:0000303 PubMed:10455171}; Single-pass type I membrane protein {ECO:0000255}. Recycling endosome {ECO:0000269 PubMed:16256741}. Melanosome {ECO:0000269 PubMed:17081065}. Cleavage furrow {ECO:0000269 PubMed:17956333}. Cell projection, lamellipodium {ECO:0000269 PubMed:11919189}. Cell projection, ruffle {ECO:0000269 PubMed:11919189}. Cell junction, focal adhesion {ECO:0000269 PubMed:17158881}. Cell surface {ECO:0000269 PubMed:17158881}. Note=Isoform 2 does not localize to focal adhesions. Highly enriched in stage I melanosomes. Located on plasma membrane of neuroblastoma NMB7 cells. In a lung cancer cell line, in prometaphase and metaphase, localizes diffusely at the membrane and in a few intracellular vesicles. In early telophase, detected mainly on the matrix-facing side of the cells. By mid-telophase, concentrated to the ingressing cleavage furrow, mainly to the basal side of the furrow. In late telophase, concentrated to the extending protrusions formed at the opposite ends of the spreading daughter cells, in vesicles at the base of the lamellipodia formed by the separating daughter cells. Colocalizes with ITGB1BP1 and metastatic suppressor protein NME2 at the edge or peripheral ruffles and lamellipodia during the early stages of cell spreading on fibronectin or collagen. Translocates from peripheral focal adhesions sites to fibrillar adhesions in a ITGB1BP1-dependent manner. Enriched preferentially at invadopodia, cell membrane protrusions that correspond to sites of cell invasion, in a collagen-dependent manner. Localized at plasma and ruffle membranes in a collagen-independent manner. {ECO:0000269 PubMed:10455171, ECO:0000303 PubMed:10455171}.; Isoform 5: Cell membrane, sarcolemma {ECO:0000250}. Cell junction {ECO:0000250}. Note=In cardiac muscle, isoform 5 is found in costameres and intercalated disks. {ECO:0000250}. |
| Protein SCO2 homolog, mitochondrial                                            | O43819  | SCO2   | Mitochondrion inner membrane {ECO:0000269 PubMed:15229189}; Single-pass membrane protein {ECO:0000255}.                                                                                                                                                                                                                                                                                                                                                                                                                                                                                                                                                                                                                                                                                                                                                                                                                                                                                                                                                                                                                                                                                                                                                                                                                                                                                                                                                                                                                                                                                                                                                                                                                                                                                                                                                                                                                                                                                                                                                                                                                                                                                      |
| Heat shock protein 75 kDa, mitochondrial                                       | Q12931  | TRAP1  | Mitochondrion {ECO:0000269 PubMed:23564345}. Mitochondrion inner membrane {ECO:0000269 PubMed:23564345}. Mitochondrion matrix {ECO:0000269 PubMed:23564345}.                                                                                                                                                                                                                                                                                                                                                                                                                                                                                                                                                                                                                                                                                                                                                                                                                                                                                                                                                                                                                                                                                                                                                                                                                                                                                                                                                                                                                                                                                                                                                                                                                                                                                                                                                                                                                                                                                                                                                                                                                                 |
| [Pyruvate dehydrogenase (acetyl-transferring)] kinase isozyme 2, mitochondrial | Q15119  | PDK2   | Mitochondrion matrix.                                                                                                                                                                                                                                                                                                                                                                                                                                                                                                                                                                                                                                                                                                                                                                                                                                                                                                                                                                                                                                                                                                                                                                                                                                                                                                                                                                                                                                                                                                                                                                                                                                                                                                                                                                                                                                                                                                                                                                                                                                                                                                                                                                        |
| Citrate synthase, mitochondrial                                                | O75390  | CS     | Mitochondrion matrix.                                                                                                                                                                                                                                                                                                                                                                                                                                                                                                                                                                                                                                                                                                                                                                                                                                                                                                                                                                                                                                                                                                                                                                                                                                                                                                                                                                                                                                                                                                                                                                                                                                                                                                                                                                                                                                                                                                                                                                                                                                                                                                                                                                        |
| D-glutamate cyclase, mitochondrial                                             | Q7Z3D6  | DGLUCY | Mitochondrion matrix {ECO:0000250 UniProtKB:Q8BH86}.                                                                                                                                                                                                                                                                                                                                                                                                                                                                                                                                                                                                                                                                                                                                                                                                                                                                                                                                                                                                                                                                                                                                                                                                                                                                                                                                                                                                                                                                                                                                                                                                                                                                                                                                                                                                                                                                                                                                                                                                                                                                                                                                         |

**Supplemental Table 1 Page 49. All proteins quantitated in study**

| Protein Name                                            | Uniprot | Gene    | Subcellular localization                                                                                                                                                                                                                                                                                                                                                                                                                                                                                                                                                                                                                                                                                                                                                                                                                  |
|---------------------------------------------------------|---------|---------|-------------------------------------------------------------------------------------------------------------------------------------------------------------------------------------------------------------------------------------------------------------------------------------------------------------------------------------------------------------------------------------------------------------------------------------------------------------------------------------------------------------------------------------------------------------------------------------------------------------------------------------------------------------------------------------------------------------------------------------------------------------------------------------------------------------------------------------------|
| Talin-2                                                 | Q9Y4G6  | TLN2    | Cytoplasm {ECO:0000269 PubMed:27223613}. Cell junction, focal adhesion {ECO:0000269 PubMed:12422219}. Cell junction, synapse {ECO:0000269 PubMed:12422219}. Cell membrane; Peripheral membrane protein; Cytoplasmic side {ECO:0000269 PubMed:12422219}. Cytoplasm, cytoskeleton {ECO:0000269 PubMed:12422219}. Note=Focal adhesion plaques and synapses (PubMed:12422219). {ECO:0000269 PubMed:12422219}.                                                                                                                                                                                                                                                                                                                                                                                                                                 |
| Caveolae-associated protein 4                           | Q5BKX8  | CAVIN4  | Cytoplasm, myofibril, sarcomere {ECO:0000250 UniProtKB:A2AMM0}. Cytoplasm {ECO:0000250 UniProtKB:A2AMM0}. Cytoplasm, cytosol {ECO:0000250 UniProtKB:A2AMM0}. Cell membrane, sarcolemma {ECO:0000250 UniProtKB:A2AMM0}. Membrane, caveola {ECO:0000269 PubMed:19525939}. Cell membrane {ECO:0000269 PubMed:26497963}. Note=In cardiomyocytes, accumulates in the Z-line of the sarcomere. In vascular smooth muscle cells, detected diffusely throughout the cytoplasm. Localizes in the caveolae in a caveolin-dependent manner. {ECO:0000250 UniProtKB:A2AMM0}.                                                                                                                                                                                                                                                                          |
| Coiled-coil domain-containing protein 127               | Q96BQ5  | CCDC127 | 0                                                                                                                                                                                                                                                                                                                                                                                                                                                                                                                                                                                                                                                                                                                                                                                                                                         |
| Serine beta-lactamase-like protein LACTB, mitochondrial | P83111  | LACTB   | Mitochondrion {ECO:0000269 PubMed:11551941, ECO:0000269 PubMed:19858488, ECO:0000269 PubMed:28329758}.                                                                                                                                                                                                                                                                                                                                                                                                                                                                                                                                                                                                                                                                                                                                    |
| Caveolae-associated protein 1                           | Q6NZI2  | CAVIN1  | Membrane, caveola {ECO:0000269 PubMed:15242332, ECO:0000269 PubMed:18056712, ECO:0000269 PubMed:19525939}. Cell membrane {ECO:0000269 PubMed:15242332, ECO:0000269 PubMed:17026959, ECO:0000269 PubMed:18056712}. Microsome {ECO:0000269 PubMed:15242332, ECO:0000269 PubMed:17026959}. Endoplasmic reticulum {ECO:0000250 UniProtKB:P85125}. Cytoplasm, cytosol {ECO:0000269 PubMed:15242332}. Mitochondrion {ECO:0000269 PubMed:15242332, ECO:0000269 PubMed:17026959}. Nucleus {ECO:0000269 PubMed:15242332, ECO:0000269 PubMed:17026959}. Note=Translocates to the cytoplasm from the caveolae upon insulin stimulation (PubMed:17026959). Colocalizes with CAV1 in lipid rafts in adipocytes. Localizes in the caveolae in a caveolin-dependent manner (By similarity). {ECO:0000250 UniProtKB:O54724, ECO:0000269 PubMed:17026959}. |
| Protein cordon-bleu                                     | O75128  | COBL    | Cell membrane {ECO:0000250}; Peripheral membrane protein {ECO:0000250}; Cytoplasmic side {ECO:0000250}. Cytoplasm, cytoskeleton {ECO:0000250}. Cell projection, ruffle {ECO:0000250}. Cytoplasm {ECO:0000250}. Note=Recruited to the cell membrane via interaction with PACSIN1. Colocalizes with the actin cytoskeleton. Detected throughout the neuron cell body, as well as in axons and dendrites (By similarity). {ECO:0000250}.                                                                                                                                                                                                                                                                                                                                                                                                     |
| Peroxisome oxidoreductin-1                              | Q06830  | PRDX1   | Cytoplasm {ECO:0000269 PubMed:17081065, ECO:0000269 PubMed:9497357}. Melanosome {ECO:0000269 PubMed:17081065}. Note=Identified by mass spectrometry in melanosome fractions from stage I to stage IV.                                                                                                                                                                                                                                                                                                                                                                                                                                                                                                                                                                                                                                     |

**Supplemental Table 1 Page 50. All proteins quantitated in study**

| Protein Name                                            | Uniprot | Gene    | Subcellular localization                                                                                                                                                                                                                                                                                                                                                                                                                                                                                                                                                                                                              |
|---------------------------------------------------------|---------|---------|---------------------------------------------------------------------------------------------------------------------------------------------------------------------------------------------------------------------------------------------------------------------------------------------------------------------------------------------------------------------------------------------------------------------------------------------------------------------------------------------------------------------------------------------------------------------------------------------------------------------------------------|
| Dystrophin                                              | P11532  | DMD     | Cell membrane, sarcolemma {ECO:0000250 UniProtKB:P11531}; Peripheral membrane protein {ECO:0000250 UniProtKB:P11531}; Cytoplasmic side {ECO:0000250 UniProtKB:P11531}. Cytoplasm, cytoskeleton {ECO:0000250 UniProtKB:P11531}. Cell junction, synapse, postsynaptic cell membrane {ECO:0000250 UniProtKB:P11531}. Note=In muscle cells, sarcolemma localization requires the presence of ANK2, while localization to costameres requires the presence of ANK3. Localizes to neuromuscular junctions (NMJs). In adult muscle, NMJ localization depends upon ANK2 presence, but not in newborn animals. {ECO:0000250 UniProtKB:P11531}. |
| 39S ribosomal protein L28, mitochondrial                | Q13084  | MRPL28  | Mitochondrion {ECO:0000269 PubMed:25278503, ECO:0000269 PubMed:28892042}.                                                                                                                                                                                                                                                                                                                                                                                                                                                                                                                                                             |
| Cytochrome c oxidase subunit 4 isoform 1, mitochondrial | P13073  | COX4I1  | Mitochondrion inner membrane {ECO:0000250 UniProtKB:P19783}.                                                                                                                                                                                                                                                                                                                                                                                                                                                                                                                                                                          |
| Ankyrin-1                                               | P16157  | ANK1    | Isoform Er1: Cytoplasm, cytoskeleton. Note=Probably the other erythrocyte (Er) isoforms, are located near the surface of erythrocytic plasma membrane.; Isoform Mu17: Membrane. Cytoplasm, myofibril, sarcomere, M line. Note=Colocalizes with OBSCN isoform 3/obscurin at the M line in differentiated skeletal muscle cells.; Isoform Mu18: Sarcoplasmic reticulum {ECO:0000305}.; Isoform Mu19: Sarcoplasmic reticulum {ECO:0000305}.; Isoform Mu20: Sarcoplasmic reticulum {ECO:0000305}.                                                                                                                                         |
| Voltage-dependent anion-selective channel protein 3     | Q9Y277  | VDAC3   | Mitochondrion outer membrane.                                                                                                                                                                                                                                                                                                                                                                                                                                                                                                                                                                                                         |
| HIG1 domain family member 2A, mitochondrial             | Q9BW72  | HIGD2A  | Mitochondrion membrane {ECO:0000255 PROSITE-ProRule:PRU00836, ECO:0000269 PubMed:22342701}; Multi-pass membrane protein {ECO:0000255 PROSITE-ProRule:PRU00836, ECO:0000269 PubMed:22342701}. Mitochondrion inner membrane {ECO:0000305 PubMed:22342701}.                                                                                                                                                                                                                                                                                                                                                                              |
| Talin-1                                                 | Q9Y490  | TLN1    | Cell projection, ruffle membrane {ECO:0000250}; Peripheral membrane protein {ECO:0000250}; Cytoplasmic side {ECO:0000250}. Cytoplasm, cytoskeleton {ECO:0000250}. Cell surface {ECO:0000250 UniProtKB:P26039}. Cell junction, focal adhesion {ECO:0000250 UniProtKB:P26039}. Note=Colocalizes with LAYN at the membrane ruffles. Localized preferentially in focal adhesions than fibrillar adhesions (By similarity). {ECO:0000250}.                                                                                                                                                                                                 |
| Aconitate hydratase, mitochondrial                      | Q99798  | ACO2    | Mitochondrion {ECO:0000250 UniProtKB:P16276}.                                                                                                                                                                                                                                                                                                                                                                                                                                                                                                                                                                                         |
| Endoplasmin                                             | P14625  | HSP90B1 | Endoplasmic reticulum lumen {ECO:0000305 PubMed:12475965}. Sarcoplasmic reticulum lumen {ECO:0000250 UniProtKB:P41148}. Melanosome {ECO:0000269 PubMed:12643545, ECO:0000269 PubMed:17081065}. Note=Identified by mass spectrometry in melanosome fractions from stage I to stage IV. {ECO:0000269 PubMed:12643545, ECO:0000269 PubMed:17081065}.                                                                                                                                                                                                                                                                                     |

**Supplemental Table 1 Page 51. All proteins quantitated in study**

| Protein Name                                                | Uniprot | Gene    | Subcellular localization                                                                                                                                                                                                                                                                                                                                                                                                                                                                                                                           |
|-------------------------------------------------------------|---------|---------|----------------------------------------------------------------------------------------------------------------------------------------------------------------------------------------------------------------------------------------------------------------------------------------------------------------------------------------------------------------------------------------------------------------------------------------------------------------------------------------------------------------------------------------------------|
| Prostaglandin E synthase 2                                  | Q9H7Z7  | PTGES2  | Golgi apparatus membrane {ECO:0000269 PubMed:12835322}; Single-pass membrane protein {ECO:0000255}.; Prostaglandin E synthase 2 truncated form: Cytoplasm, perinuclear region {ECO:0000269 PubMed:12835322}. Note=Synthesized as a Golgi membrane-bound protein, which is further cleaved into the predominant soluble truncated form. The truncated form is cytoplasmic and is enriched in the perinuclear region. {ECO:0000269 PubMed:12835322}.                                                                                                 |
| Sarcolemmal membrane-associated protein                     | Q14BN4  | SLMAP   | Cell membrane, sarcolemma {ECO:0000250}; Single-pass type IV membrane protein {ECO:0000250}. Cytoplasm, cytoskeleton, microtubule organizing center, centrosome {ECO:0000250}. Note=Membrane-associated. Distributed in the transverse tubules and near the junctional sarcoplasmic reticulum. Detected along the Z- and M-lines in cardiomyocytes. Centrosome. Localizes to the centrosomes in a microtubule-dependent manner (By similarity). {ECO:0000250}.                                                                                     |
| Paraplegin                                                  | Q9UQ90  | SPG7    | Mitochondrion inner membrane {ECO:0000269 PubMed:9635427}; Multi-pass membrane protein {ECO:0000255}.                                                                                                                                                                                                                                                                                                                                                                                                                                              |
| Myosin-2                                                    | Q9UKX2  | MYH2    | Cytoplasm, myofibril. Note=Thick filaments of the myofibrils.                                                                                                                                                                                                                                                                                                                                                                                                                                                                                      |
| Isocitrate dehydrogenase [NAD] subunit alpha, mitochondrial | P50213  | IDH3A   | Mitochondrion.                                                                                                                                                                                                                                                                                                                                                                                                                                                                                                                                     |
| Calreticulin                                                | P27797  | CALR    | Endoplasmic reticulum lumen {ECO:0000269 PubMed:10358038, ECO:0000269 PubMed:11149926}. Cytoplasm, cytosol {ECO:0000269 PubMed:11149926}. Secreted, extracellular space, extracellular matrix {ECO:0000305}. Cell surface {ECO:0000269 PubMed:10358038}. Sarcoplasmic reticulum lumen {ECO:0000250 UniProtKB:P28491}. Note=Also found in cell surface (T cells), cytosol and extracellular matrix (PubMed:10358038). Associated with the lytic granules in the cytolytic T-lymphocytes. {ECO:0000269 PubMed:10358038, ECO:0000269 PubMed:8418194}. |
| MICOS complex subunit MIC27                                 | Q6UXV4  | APOOL   | Mitochondrion inner membrane {ECO:0000269 PubMed:23704930, ECO:0000269 PubMed:25764979}; Multi-pass membrane protein {ECO:0000269 PubMed:23704930}. Mitochondrion {ECO:0000269 PubMed:25781180, ECO:0000269 PubMed:25997101}.                                                                                                                                                                                                                                                                                                                      |
| Monocarboxylate transporter 1                               | P53985  | SLC16A1 | Cell membrane {ECO:0000269 PubMed:15505343, ECO:0000269 PubMed:17127621, ECO:0000269 PubMed:24390345}; Multi-pass membrane protein {ECO:0000269 PubMed:15505343, ECO:0000269 PubMed:17127621, ECO:0000269 PubMed:24390345}.                                                                                                                                                                                                                                                                                                                        |
| Ras-related protein Rab-11B                                 | Q15907  | RAB11B  | Recycling endosome membrane {ECO:0000250}; Lipid-anchor {ECO:0000250}; Cytoplasmic side {ECO:0000250}. Cytoplasmic vesicle, secretory vesicle, synaptic vesicle membrane {ECO:0000250}; Lipid-anchor {ECO:0000250}; Cytoplasmic side {ECO:0000250}. Cytoplasmic vesicle, phagosome membrane {ECO:0000305 PubMed:21255211}; Lipid-anchor {ECO:0000305 PubMed:21255211}; Cytoplasmic side {ECO:0000305 PubMed:21255211}. Note=Recruited to phagosomes containing <i>S.aureus</i> .                                                                   |

**Supplemental Table 1 Page 52. All proteins quantitated in study**

| Protein Name                                                         | Uniprot | Gene   | Subcellular localization                                                                                                                                                                                                                                                                                                                                                                                                                        |
|----------------------------------------------------------------------|---------|--------|-------------------------------------------------------------------------------------------------------------------------------------------------------------------------------------------------------------------------------------------------------------------------------------------------------------------------------------------------------------------------------------------------------------------------------------------------|
| Presequence protease, mitochondrial                                  | Q5JRX3  | PITRM1 | Mitochondrion matrix {ECO:0000269 PubMed:16849325, ECO:0000269 PubMed:19196155}.                                                                                                                                                                                                                                                                                                                                                                |
| 60S acidic ribosomal protein P0                                      | P05388  | RPLP0  | Nucleus {ECO:0000269 PubMed:19188445}. Cytoplasm {ECO:0000269 PubMed:19188445}.<br>Note=Localized in cytoplasmic mRNP granules containing untranslated mRNAs (PubMed:19188445, PubMed:17289661). {ECO:0000269 PubMed:17289661, ECO:0000269 PubMed:19188445}.                                                                                                                                                                                    |
| Succinate--CoA ligase [ADP/GDP-forming] subunit alpha, mitochondrial | P53597  | SUCLG1 | Mitochondrion {ECO:0000255 HAMAP-Rule:MF_03222}.                                                                                                                                                                                                                                                                                                                                                                                                |
| Myosin light chain 1/3, skeletal muscle isoform                      | P05976  | MYL1   | 0                                                                                                                                                                                                                                                                                                                                                                                                                                               |
| Nebulin                                                              | P20929  | NEB    | Cytoplasm, myofibril, sarcomere. Cytoplasm, cytoskeleton.                                                                                                                                                                                                                                                                                                                                                                                       |
| Calcium/calmodulin-dependent protein kinase type II subunit alpha    | Q9UQM7  | CAMK2A | Cell junction, synapse {ECO:0000250 UniProtKB:P11275}. Cell junction, synapse, postsynaptic cell membrane, postsynaptic density {ECO:0000250 UniProtKB:P11275}. Cell projection, dendritic spine {ECO:0000269 PubMed:28130356}. Cell projection, dendrite {ECO:0000269 PubMed:28130356}.<br>Note=Postsynaptic lipid rafts. {ECO:0000250 UniProtKB:P11275}.                                                                                      |
| 28S ribosomal protein S9, mitochondrial                              | P82933  | MRPS9  | Mitochondrion {ECO:0000269 PubMed:25838379}.                                                                                                                                                                                                                                                                                                                                                                                                    |
| Protein SCO1 homolog, mitochondrial                                  | O75880  | SCO1   | Mitochondrion {ECO:0000269 PubMed:9878253}. Mitochondrion inner membrane {ECO:0000269 PubMed:15229189}; Single-pass membrane protein {ECO:0000255}.                                                                                                                                                                                                                                                                                             |
| Alpha-sarcoglycan                                                    | Q16586  | SGCA   | Cell membrane, sarcolemma {ECO:0000250}; Single-pass type I membrane protein {ECO:0000250}.<br>Cytoplasm, cytoskeleton {ECO:0000250}.                                                                                                                                                                                                                                                                                                           |
| NADH dehydrogenase [ubiquinone] iron-sulfur protein 6, mitochondrial | O75380  | NDUFS6 | Mitochondrion inner membrane {ECO:0000305 PubMed:12611891}; Peripheral membrane protein {ECO:0000305}; Matrix side {ECO:0000305}.                                                                                                                                                                                                                                                                                                               |
| Troponin C, slow skeletal and cardiac muscles                        | P63316  | TNNC1  | 0                                                                                                                                                                                                                                                                                                                                                                                                                                               |
| 2-oxoglutarate dehydrogenase, mitochondrial                          | Q02218  | OGDH   | Mitochondrion matrix {ECO:0000305 PubMed:29211711}. Nucleus {ECO:0000269 PubMed:29211711}.<br>Note=Mainly localizes in the mitochondrion. A small fraction localizes to the nucleus, where the 2-oxoglutarate dehydrogenase complex is required for histone succinylation.<br>{ECO:0000269 PubMed:29211711}.                                                                                                                                    |
| Agmatinase, mitochondrial                                            | Q9BSE5  | AGMAT  | Mitochondrion.                                                                                                                                                                                                                                                                                                                                                                                                                                  |
| Dynamamin-like 120 kDa protein, mitochondrial                        | O60313  | OPA1   | Mitochondrion inner membrane {ECO:0000269 PubMed:11017079, ECO:0000269 PubMed:16778770, ECO:0000269 PubMed:20974897, ECO:0000269 PubMed:28746876}; Single-pass membrane protein {ECO:0000255}. Mitochondrion intermembrane space {ECO:0000250 UniProtKB:P58281}. Mitochondrion membrane {ECO:0000269 PubMed:24616225}. Note=Detected at contact sites between endoplasmic reticulum and mitochondrion membranes. {ECO:0000269 PubMed:24616225}. |

**Supplemental Table 1 Page 53. All proteins quantitated in study**

| Protein Name                                                         | Uniprot | Gene   | Subcellular localization                                                                                                                                                                                                                                                                                                    |
|----------------------------------------------------------------------|---------|--------|-----------------------------------------------------------------------------------------------------------------------------------------------------------------------------------------------------------------------------------------------------------------------------------------------------------------------------|
| Acyl-coenzyme A thioesterase 1                                       | Q86TX2  | ACOT1  | Cytoplasm, cytosol {ECO:0000269 PubMed:16940157}.                                                                                                                                                                                                                                                                           |
| Succinyl-CoA:3-ketoacid coenzyme A transferase 1, mitochondrial      | P55809  | OXCT1  | Mitochondrion matrix.                                                                                                                                                                                                                                                                                                       |
| Protein-arginine deiminase type-2                                    | Q9Y2J8  | PADI2  | Cytoplasm {ECO:0000269 PubMed:12392711}.                                                                                                                                                                                                                                                                                    |
| Plasma membrane calcium-transporting ATPase 2                        | Q01814  | ATP2B2 | Cell junction, synapse {ECO:0000250 UniProtKB:Q9R0K7}. Cell membrane {ECO:0000255}; Multi-pass membrane protein {ECO:0000255}.                                                                                                                                                                                              |
| SRA stem-loop-interacting RNA-binding protein, mitochondrial         | Q9GZT3  | SLIRP  | Mitochondrion {ECO:0000269 PubMed:16762838}. Nucleus {ECO:0000269 PubMed:16762838}. Note=Predominantly mitochondrial. Some fraction is nuclear. In the nucleus, it is recruited to nuclear receptor target promoters.                                                                                                       |
| Retinol dehydrogenase 13                                             | Q8NBN7  | RDH13  | Mitochondrion inner membrane {ECO:0000269 PubMed:18039331}; Peripheral membrane protein {ECO:0000269 PubMed:18039331}. Note=Localized on the outer side of the inner mitochondrial membrane. {ECO:0000269 PubMed:18039331}.                                                                                                 |
| Endonuclease domain-containing 1 protein                             | O94919  | ENDOD1 | Secreted {ECO:0000305}.                                                                                                                                                                                                                                                                                                     |
| NADH dehydrogenase [ubiquinone] 1 beta subcomplex subunit 4          | O95168  | NDUFB4 | Mitochondrion inner membrane {ECO:0000305 PubMed:12611891}; Single-pass membrane protein {ECO:0000255}; Matrix side {ECO:0000305}.                                                                                                                                                                                          |
| Mitochondrial import inner membrane translocase subunit Tim21        | Q9BVV7  | TIMM21 | Mitochondrion membrane {ECO:0000305}; Single-pass membrane protein {ECO:0000305}.                                                                                                                                                                                                                                           |
| Xin actin-binding repeat-containing protein 1                        | Q702N8  | XIRP1  | Cell junction {ECO:0000269 PubMed:15454575}. Note=Colocalizes with actin stress fibers.                                                                                                                                                                                                                                     |
| NADH dehydrogenase [ubiquinone] iron-sulfur protein 2, mitochondrial | O75306  | NDUFS2 | Mitochondrion inner membrane {ECO:0000269 PubMed:12611891, ECO:0000269 PubMed:9585441}; Peripheral membrane protein {ECO:0000269 PubMed:12611891}; Matrix side {ECO:0000269 PubMed:12611891}.                                                                                                                               |
| Succinate dehydrogenase cytochrome b560 subunit, mitochondrial       | Q99643  | SDHC   | Mitochondrion inner membrane; Multi-pass membrane protein.                                                                                                                                                                                                                                                                  |
| Mitochondrial-processing peptidase subunit alpha                     | Q10713  | PMPCA  | Mitochondrion matrix {ECO:0000250 UniProtKB:P20069}. Mitochondrion inner membrane {ECO:0000269 PubMed:25808372}.                                                                                                                                                                                                            |
| Serine protease HTRA2, mitochondrial                                 | O43464  | HTRA2  | Mitochondrion intermembrane space. Mitochondrion membrane {ECO:0000305}; Single-pass membrane protein {ECO:0000305}. Note=Predominantly present in the intermembrane space. Released into the cytosol following apoptotic stimuli, such as UV treatment, and stimulation of mitochondria with caspase-8 truncated BID/tBID. |
| Gamma-sarcoglycan                                                    | Q13326  | SGCG   | Cell membrane, sarcolemma {ECO:0000250}; Single-pass type II membrane protein {ECO:0000250}. Cytoplasm, cytoskeleton {ECO:0000250}.                                                                                                                                                                                         |

**Supplemental Table 1 Page 54. All proteins quantitated in study**

| Protein Name                                                | Uniprot | Gene     | Subcellular localization                                                                                                                                                                                                                                                                                                                                                                                                                                                                                                                                                                                                                                                                                                                                                                                                                                                                                    |
|-------------------------------------------------------------|---------|----------|-------------------------------------------------------------------------------------------------------------------------------------------------------------------------------------------------------------------------------------------------------------------------------------------------------------------------------------------------------------------------------------------------------------------------------------------------------------------------------------------------------------------------------------------------------------------------------------------------------------------------------------------------------------------------------------------------------------------------------------------------------------------------------------------------------------------------------------------------------------------------------------------------------------|
| Metaxin-2                                                   | O75431  | MTX2     | Mitochondrion outer membrane {ECO:0000269 PubMed:10381257}. Mitochondrion {ECO:0000269 PubMed:25997101}.                                                                                                                                                                                                                                                                                                                                                                                                                                                                                                                                                                                                                                                                                                                                                                                                    |
| NADH dehydrogenase [ubiquinone] 1 beta subcomplex subunit 7 | P17568  | NDUFB7   | Mitochondrion inner membrane {ECO:0000269 PubMed:21310150}; Peripheral membrane protein {ECO:0000269 PubMed:21310150}. Mitochondrion intermembrane space {ECO:0000269 PubMed:21310150}.                                                                                                                                                                                                                                                                                                                                                                                                                                                                                                                                                                                                                                                                                                                     |
| Obscurin                                                    | Q5VST9  | OBSCN    | Isoform 3: Cytoplasm, myofibril, sarcomere, M line {ECO:0000269 PubMed:12527750}. Cytoplasm, myofibril, sarcomere, Z line {ECO:0000269 PubMed:12527750}. Note=In differentiating skeletal muscle cells, isoform 3 primarily localizes to the sarcomeric M-line and less frequently to the Z-disk (PubMed:12527750). Isoform 3 colocalizes with ANK1 isoform Mu17/ank1.5 at the M-line in differentiated skeletal muscle cells (PubMed:12527750).; Cytoplasm, myofibril, sarcomere, M line {ECO:0000250 UniProtKB:A2AAJ9}. Cytoplasm, myofibril, sarcomere, Z line {ECO:0000250 UniProtKB:A2AAJ9}. Cell membrane, sarcolemma {ECO:0000250 UniProtKB:A2AAJ9}. Nucleus {ECO:0000250 UniProtKB:A2AAJ9}. Note=Colocalizes with CDH2 and ATP1B1 to the sarcolemma and to intercalating disks in cardiac muscles. Colocalizes with ATP1B1 to M line and Z line in cardiac muscles. {ECO:0000250 UniProtKB:A2AAJ9}. |
| NADH-ubiquinone oxidoreductase chain 5                      | P03915  | MT-ND5   | Mitochondrion inner membrane {ECO:0000250}; Multi-pass membrane protein {ECO:0000250}.                                                                                                                                                                                                                                                                                                                                                                                                                                                                                                                                                                                                                                                                                                                                                                                                                      |
| Very-long-chain (3R)-3-hydroxyacyl-CoA dehydratase 1        | B0YJ81  | HACD1    | Isoform 1: Endoplasmic reticulum membrane {ECO:0000269 PubMed:18554506}; Multi-pass membrane protein {ECO:0000269 PubMed:18554506}.                                                                                                                                                                                                                                                                                                                                                                                                                                                                                                                                                                                                                                                                                                                                                                         |
| Transmembrane protein 126A                                  | Q9H061  | TMEM126A | Mitochondrion inner membrane {ECO:0000269 PubMed:19327736, ECO:0000269 PubMed:23500070}; Multi-pass membrane protein {ECO:0000269 PubMed:19327736, ECO:0000269 PubMed:23500070}.                                                                                                                                                                                                                                                                                                                                                                                                                                                                                                                                                                                                                                                                                                                            |
| Cullin-associated NEDD8-dissociated protein 1               | Q86VP6  | CAND1    | Cytoplasm {ECO:0000269 PubMed:21249194}. Nucleus {ECO:0000269 PubMed:21249194}. Note=Predominantly cytoplasmic.                                                                                                                                                                                                                                                                                                                                                                                                                                                                                                                                                                                                                                                                                                                                                                                             |
| Hexokinase-1                                                | P19367  | HK1      | Mitochondrion outer membrane. Note=Its hydrophobic N-terminal sequence may be involved in membrane binding.                                                                                                                                                                                                                                                                                                                                                                                                                                                                                                                                                                                                                                                                                                                                                                                                 |
| 60S ribosomal protein L6                                    | Q02878  | RPL6     | Cytoplasm, cytosol {ECO:0000269 PubMed:25957688}. Cytoplasm {ECO:0000305 PubMed:23636399, ECO:0000305 PubMed:25901680}. Rough endoplasmic reticulum {ECO:0000250 UniProtKB:Q2YGT9}. Note=Detected on cytosolic polysomes (PubMed:25957688). Detected in ribosomes that are associated with the rough endoplasmic reticulum (By similarity). {ECO:0000250 UniProtKB:Q2YGT9, ECO:0000269 PubMed:25957688}.                                                                                                                                                                                                                                                                                                                                                                                                                                                                                                    |
| ER membrane protein complex subunit 2                       | Q15006  | EMC2     | Nucleus {ECO:0000250}. Cytoplasm {ECO:0000269 PubMed:22119785}.                                                                                                                                                                                                                                                                                                                                                                                                                                                                                                                                                                                                                                                                                                                                                                                                                                             |
| Succinate-semialdehyde dehydrogenase, mitochondrial         | P51649  | ALDH5A1  | Mitochondrion.                                                                                                                                                                                                                                                                                                                                                                                                                                                                                                                                                                                                                                                                                                                                                                                                                                                                                              |

**Supplemental Table 1 Page 55. All proteins quantitated in study**

| Protein Name                                                               | Uniprot | Gene     | Subcellular localization                                                                                                                                |
|----------------------------------------------------------------------------|---------|----------|---------------------------------------------------------------------------------------------------------------------------------------------------------|
| NADH dehydrogenase [ubiquinone] 1 beta subcomplex subunit 5, mitochondrial | O43674  | NDUFB5   | Mitochondrion inner membrane {ECO:0000305 PubMed:12611891}; Single-pass membrane protein {ECO:0000305}; Matrix side {ECO:0000305}.                      |
| NADH dehydrogenase [ubiquinone] flavoprotein 1, mitochondrial              | P49821  | NDUFV1   | Mitochondrion inner membrane; Peripheral membrane protein; Matrix side.                                                                                 |
| Deoxyribonuclease-1-like 1                                                 | P49184  | DNASE1L1 | Endoplasmic reticulum {ECO:0000269 PubMed:16107205}.                                                                                                    |
| Glycerol-3-phosphate dehydrogenase 1-like protein                          | Q8N335  | GPD1L    | Cytoplasm {ECO:0000269 PubMed:17967977}. Note=Localized to the region of the plasma membrane.                                                           |
| Glyoxylate reductase/hydroxypyruvate reductase                             | Q9UBQ7  | GRHPR    | 0                                                                                                                                                       |
| Aspartate aminotransferase, cytoplasmic                                    | P17174  | GOT1     | Cytoplasm {ECO:0000269 PubMed:1974457}.                                                                                                                 |
| 60S acidic ribosomal protein P2                                            | P05387  | RPLP2    | 0                                                                                                                                                       |
| Quinone oxidoreductase                                                     | Q08257  | CRYZ     | Cytoplasm {ECO:0000269 PubMed:20103721}.                                                                                                                |
| Voltage-dependent calcium channel subunit alpha-2/delta-1                  | P54289  | CACNA2D1 | Membrane {ECO:0000305}; Single-pass type I membrane protein {ECO:0000305}.                                                                              |
| 14-3-3 protein zeta/delta                                                  | P63104  | YWHAZ    | Cytoplasm {ECO:0000269 PubMed:17081065}. Melanosome {ECO:0000269 PubMed:17081065}. Note=Located to stage I to stage IV melanosomes.                     |
| Dehydrogenase/reductase SDR family member 7C                               | A6NNS2  | DHRS7C   | Secreted {ECO:0000305}.                                                                                                                                 |
| Cytochrome b-c1 complex subunit 7                                          | P14927  | UQCRB    | Mitochondrion inner membrane.                                                                                                                           |
| Calcium uptake protein 2, mitochondrial                                    | Q8IYU8  | MICU2    | Mitochondrion intermembrane space {ECO:0000269 PubMed:24231807, ECO:0000269 PubMed:24560927, ECO:0000269 PubMed:26774479, ECO:0000269 PubMed:27099988}. |
| Phosphatidate cytidyltransferase 2                                         | O95674  | CDS2     | Mitochondrion inner membrane {ECO:0000305}; Multi-pass membrane protein {ECO:0000305}; Matrix side {ECO:0000305}.                                       |
| Malectin                                                                   | Q14165  | MLEC     | Endoplasmic reticulum membrane {ECO:0000250}; Single-pass type I membrane protein {ECO:0000250}.                                                        |
| 60 kDa heat shock protein, mitochondrial                                   | P10809  | HSPD1    | Mitochondrion matrix.                                                                                                                                   |
| Lon protease homolog, mitochondrial                                        | P36776  | LONP1    | Mitochondrion matrix {ECO:0000255 HAMAP-Rule:MF_03120, ECO:0000269 PubMed:7961901}.                                                                     |
| Keratin, type II cytoskeletal 1                                            | P04264  | KRT1     | Cell membrane {ECO:0000269 PubMed:17956333}. Note=Located on plasma membrane of neuroblastoma NMB7 cells.                                               |

**Supplemental Table 1 Page 56. All proteins quantitated in study**

| Protein Name                                               | Uniprot | Gene    | Subcellular localization                                                                                                                                                                                                                                                                                                                                                                                                                                                                                                                                                                                                                                                                                                                                                                                 |
|------------------------------------------------------------|---------|---------|----------------------------------------------------------------------------------------------------------------------------------------------------------------------------------------------------------------------------------------------------------------------------------------------------------------------------------------------------------------------------------------------------------------------------------------------------------------------------------------------------------------------------------------------------------------------------------------------------------------------------------------------------------------------------------------------------------------------------------------------------------------------------------------------------------|
| Aspartate aminotransferase, mitochondrial                  | P00505  | GOT2    | Mitochondrion matrix {ECO:0000269 PubMed:9537447}. Cell membrane {ECO:0000269 PubMed:9537447}. Note=Exposure to alcohol promotes translocation to the cell membrane.                                                                                                                                                                                                                                                                                                                                                                                                                                                                                                                                                                                                                                     |
| Acetyl-coenzyme A synthetase 2-like, mitochondrial         | Q9NUB1  | ACSS1   | Mitochondrion matrix {ECO:0000269 PubMed:16788062}.                                                                                                                                                                                                                                                                                                                                                                                                                                                                                                                                                                                                                                                                                                                                                      |
| Cytochrome c1, heme protein, mitochondrial                 | P08574  | CYC1    | Mitochondrion inner membrane; Single-pass membrane protein; Intermembrane side.                                                                                                                                                                                                                                                                                                                                                                                                                                                                                                                                                                                                                                                                                                                          |
| Barrier-to-autointegration factor                          | O75531  | BANF1   | Barrier-to-autointegration factor: Nucleus {ECO:0000269 PubMed:16495336, ECO:0000269 PubMed:24600006}. Cytoplasm {ECO:0000269 PubMed:16495336, ECO:0000269 PubMed:24600006}. Chromosome {ECO:0000269 PubMed:16495336}. Nucleus envelope {ECO:0000269 PubMed:24600006}. Note=Significantly enriched at the nuclear inner membrane, diffusely throughout the nucleus during interphase and concentrated at the chromosomes during the M-phase. The phosphorylated form (by VRK1 or vaccinia virus B1 kinase) shows a cytoplasmic localization whereas the unphosphorylated form locates almost exclusively in the nucleus (PubMed:24600006, PubMed:16495336). May be included in HIV-1 virions via its interaction with viral GAG polyprotein. {ECO:0000269 PubMed:16495336, ECO:0000269 PubMed:24600006}. |
| Sulfite oxidase, mitochondrial                             | P51687  | SUOX    | Mitochondrion intermembrane space.                                                                                                                                                                                                                                                                                                                                                                                                                                                                                                                                                                                                                                                                                                                                                                       |
| NAD-dependent protein deacetylase sirtuin-3, mitochondrial | Q9NTG7  | SIRT3   | Mitochondrion matrix {ECO:0000269 PubMed:12186850, ECO:0000269 PubMed:12374852, ECO:0000269 PubMed:16079181, ECO:0000269 PubMed:18215119, ECO:0000269 PubMed:23283301, ECO:0000269 PubMed:29445193}.                                                                                                                                                                                                                                                                                                                                                                                                                                                                                                                                                                                                     |
| ATP synthase subunit a                                     | P00846  | MT-ATP6 | Mitochondrion inner membrane; Multi-pass membrane protein.                                                                                                                                                                                                                                                                                                                                                                                                                                                                                                                                                                                                                                                                                                                                               |
| Hydroxyacyl-coenzyme A dehydrogenase, mitochondrial        | Q16836  | HADH    | Mitochondrion matrix.                                                                                                                                                                                                                                                                                                                                                                                                                                                                                                                                                                                                                                                                                                                                                                                    |
| 60S ribosomal protein L7                                   | P18124  | RPL7    | 0                                                                                                                                                                                                                                                                                                                                                                                                                                                                                                                                                                                                                                                                                                                                                                                                        |
| Sodium/potassium-transporting ATPase subunit beta-1        | P05026  | ATP1B1  | Cell membrane {ECO:0000255}; Single-pass type II membrane protein {ECO:0000255}. Cell membrane, sarcolemma {ECO:0000250 UniProtKB:P14094}. Note=Colocalizes with OBSCN at the intercalated disk and sarcolemma in cardiomyocytes. Localizes in long striations at the level of Z and M lines. {ECO:0000250 UniProtKB:P14094}.                                                                                                                                                                                                                                                                                                                                                                                                                                                                            |
| ATP synthase F(0) complex subunit C2, mitochondrial        | Q06055  | ATP5MC2 | Mitochondrion membrane; Multi-pass membrane protein.                                                                                                                                                                                                                                                                                                                                                                                                                                                                                                                                                                                                                                                                                                                                                     |
| Annexin A11                                                | P50995  | ANXA11  | Cytoplasm {ECO:0000269 PubMed:28469040}. Melanosome. Nucleus envelope. Nucleus, nucleoplasm {ECO:0000269 PubMed:28469040}. Cytoplasm, cytoskeleton, spindle. Note=Found throughout the nucleoplasm at interphase and during mitosis concentrates around the mitotic apparatus (By similarity). Elevation of intracellular calcium causes relocalization from the nucleoplasm to the nuclear envelope, with little effect on the cytoplasmic pool. Localization to the nuclear envelope is cell-cycle dependent. {ECO:0000250}.                                                                                                                                                                                                                                                                           |

**Supplemental Table 1 Page 57. All proteins quantitated in study**

| Protein Name                                                    | Uniprot | Gene   | Subcellular localization                                                                                                                                                                                                                                                                                                                                                                                                                                                                                                                                                                                                                                                                                                                                                                                                                                                                                                                                                                                 |
|-----------------------------------------------------------------|---------|--------|----------------------------------------------------------------------------------------------------------------------------------------------------------------------------------------------------------------------------------------------------------------------------------------------------------------------------------------------------------------------------------------------------------------------------------------------------------------------------------------------------------------------------------------------------------------------------------------------------------------------------------------------------------------------------------------------------------------------------------------------------------------------------------------------------------------------------------------------------------------------------------------------------------------------------------------------------------------------------------------------------------|
| NADH dehydrogenase [ubiquinone] 1 alpha subcomplex subunit 5    | Q16718  | NDUFA5 | Mitochondrion inner membrane {ECO:0000305 PubMed:12611891}; Peripheral membrane protein {ECO:0000305}; Matrix side {ECO:0000305}.                                                                                                                                                                                                                                                                                                                                                                                                                                                                                                                                                                                                                                                                                                                                                                                                                                                                        |
| L-lactate dehydrogenase A chain                                 | P00338  | LDHA   | Cytoplasm.                                                                                                                                                                                                                                                                                                                                                                                                                                                                                                                                                                                                                                                                                                                                                                                                                                                                                                                                                                                               |
| Electron transfer flavoprotein subunit beta                     | P38117  | ETFB   | Mitochondrion matrix {ECO:0000305 PubMed:25023281, ECO:0000305 PubMed:8504797}.                                                                                                                                                                                                                                                                                                                                                                                                                                                                                                                                                                                                                                                                                                                                                                                                                                                                                                                          |
| 2-methoxy-6-polyprenyl-1,4-benzoquinol methylase, mitochondrial | Q5HYK3  | COQ5   | Mitochondrion inner membrane {ECO:0000255 HAMAP-Rule:MF_03191, ECO:0000269 PubMed:25152161}; Peripheral membrane protein {ECO:0000255 HAMAP-Rule:MF_03191, ECO:0000269 PubMed:25152161}; Matrix side {ECO:0000255 HAMAP-Rule:MF_03191, ECO:0000269 PubMed:25152161}.                                                                                                                                                                                                                                                                                                                                                                                                                                                                                                                                                                                                                                                                                                                                     |
| Cytochrome c oxidase subunit 2                                  | P00403  | MT-CO2 | Mitochondrion inner membrane; Multi-pass membrane protein.                                                                                                                                                                                                                                                                                                                                                                                                                                                                                                                                                                                                                                                                                                                                                                                                                                                                                                                                               |
| Cell division control protein 42 homolog                        | P60953  | CDC42  | Cell membrane {ECO:0000305}; Lipid-anchor {ECO:0000305}; Cytoplasmic side {ECO:0000305}. Cytoplasm, cytoskeleton, microtubule organizing center, centrosome {ECO:0000269 PubMed:15642749}. Cytoplasm, cytoskeleton, spindle {ECO:0000269 PubMed:15642749}. Midbody {ECO:0000269 PubMed:15642749}. Note=Localizes to spindle during prometaphase cells. Moves to the central spindle as cells progressed through anaphase to telophase (PubMed:15642749). Localizes at the end of cytokinesis in the intercellular bridge formed between two daughter cells (PubMed:15642749). Its localization is regulated by the activities of guanine nucleotide exchange factor ECT2 and GTPase activating protein RACGAP1 (PubMed:15642749). Colocalizes with NEK6 in the centrosome (PubMed:20873783). In its active GTP-bound form localizes to the leading edge membrane of migrating dendritic cells (By similarity). {ECO:0000250 UniProtKB:P60766, ECO:0000269 PubMed:15642749, ECO:0000269 PubMed:20873783}. |
| Keratin, type II cytoskeletal 2 epidermal                       | P35908  | KRT2   | 0                                                                                                                                                                                                                                                                                                                                                                                                                                                                                                                                                                                                                                                                                                                                                                                                                                                                                                                                                                                                        |
| Cytochrome c oxidase subunit 6B1                                | P14854  | COX6B1 | Mitochondrion intermembrane space {ECO:0000250}.                                                                                                                                                                                                                                                                                                                                                                                                                                                                                                                                                                                                                                                                                                                                                                                                                                                                                                                                                         |
| NADH dehydrogenase [ubiquinone] 1 beta subcomplex subunit 3     | O43676  | NDUFB3 | Mitochondrion inner membrane {ECO:0000305 PubMed:12611891}; Single-pass membrane protein {ECO:0000305}; Matrix side {ECO:0000305}.                                                                                                                                                                                                                                                                                                                                                                                                                                                                                                                                                                                                                                                                                                                                                                                                                                                                       |
| 5-demethoxyubiquinone hydroxylase, mitochondrial                | Q99807  | COQ7   | Mitochondrion inner membrane {ECO:0000255 HAMAP-Rule:MF_03194}; Peripheral membrane protein {ECO:0000255 HAMAP-Rule:MF_03194}; Matrix side {ECO:0000255 HAMAP-Rule:MF_03194}.                                                                                                                                                                                                                                                                                                                                                                                                                                                                                                                                                                                                                                                                                                                                                                                                                            |
| ER membrane protein complex subunit 1                           | Q8N766  | EMC1   | Membrane {ECO:0000269 PubMed:22119785}; Single-pass type I membrane protein {ECO:0000269 PubMed:22119785}.                                                                                                                                                                                                                                                                                                                                                                                                                                                                                                                                                                                                                                                                                                                                                                                                                                                                                               |

**Supplemental Table 1 Page 58. All proteins quantitated in study**

| Protein Name                                                      | Uniprot | Gene   | Subcellular localization                                                                                                                                                                                                                                                                                                                                                                                                                                                                                                                                                   |
|-------------------------------------------------------------------|---------|--------|----------------------------------------------------------------------------------------------------------------------------------------------------------------------------------------------------------------------------------------------------------------------------------------------------------------------------------------------------------------------------------------------------------------------------------------------------------------------------------------------------------------------------------------------------------------------------|
| Histone H2AX                                                      | P16104  | H2AFX  | Nucleus {ECO:0000269 PubMed:12419185, ECO:0000269 PubMed:12660252, ECO:0000269 PubMed:12697768, ECO:0000269 PubMed:15613478, ECO:0000269 PubMed:24429368}. Chromosome {ECO:0000269 PubMed:10959836, ECO:0000269 PubMed:11673449, ECO:0000269 PubMed:12607005, ECO:0000269 PubMed:12660252, ECO:0000269 PubMed:15059890, ECO:0000269 PubMed:15201865, ECO:0000269 PubMed:15613478}.                                                                                                                                                                                         |
| Mitochondrial proton/calcium exchanger protein                    | O95202  | LETM1  | Mitochondrion inner membrane {ECO:0000269 PubMed:14706454, ECO:0000269 PubMed:15138253, ECO:0000269 PubMed:18628306, ECO:0000269 PubMed:19797662}; Single-pass membrane protein {ECO:0000269 PubMed:14706454, ECO:0000269 PubMed:15138253, ECO:0000269 PubMed:18628306}.                                                                                                                                                                                                                                                                                                   |
| Transforming protein RhoA                                         | P61586  | RHOA   | Cell membrane; Lipid-anchor; Cytoplasmic side. Cytoplasm, cytoskeleton. Cleavage furrow. Cytoplasm, cell cortex {ECO:0000269 PubMed:9635436}. Midbody. Cell projection, lamellipodium {ECO:0000250}. Note=Localized to cell-cell contacts in calcium-treated keratinocytes (By similarity). Translocates to the equatorial region before furrow formation in a ECT2-dependent manner. Localizes to the equatorial cell cortex (at the site of the presumptive furrow) in early anaphase in an activated form and in a myosin- and actin-independent manner. {ECO:0000250}. |
| Calcium/calmodulin-dependent protein kinase type II subunit delta | Q13557  | CAMK2D | Cell membrane, sarcolemma {ECO:0000305}; Peripheral membrane protein {ECO:0000305}; Cytoplasmic side {ECO:0000305}. Sarcoplasmic reticulum membrane {ECO:0000305}; Peripheral membrane protein {ECO:0000305}; Cytoplasmic side {ECO:0000305}.                                                                                                                                                                                                                                                                                                                              |
| NAD(P) transhydrogenase, mitochondrial                            | Q13423  | NNT    | Mitochondrion inner membrane {ECO:0000305}; Multi-pass membrane protein {ECO:0000305}; Matrix side {ECO:0000305}.                                                                                                                                                                                                                                                                                                                                                                                                                                                          |
| Isocitrate dehydrogenase [NADP], mitochondrial                    | P48735  | IDH2   | Mitochondrion.                                                                                                                                                                                                                                                                                                                                                                                                                                                                                                                                                             |
| Hydroxyacid-oxoacid transhydrogenase, mitochondrial               | Q8IWW8  | ADHFE1 | Mitochondrion {ECO:0000250}.                                                                                                                                                                                                                                                                                                                                                                                                                                                                                                                                               |
| Nucleolin                                                         | P19338  | NCL    | Nucleus, nucleolus. Cytoplasm. Note=Localized in cytoplasmic mRNP granules containing untranslated mRNAs.                                                                                                                                                                                                                                                                                                                                                                                                                                                                  |
| Calnexin                                                          | P27824  | CANX   | Endoplasmic reticulum membrane {ECO:0000269 PubMed:22314232}; Single-pass type I membrane protein {ECO:0000255}. Endoplasmic reticulum {ECO:0000269 PubMed:22314232}. Melanosome {ECO:0000269 PubMed:12643545, ECO:0000269 PubMed:17081065}. Note=Identified by mass spectrometry in melanosome fractions from stage I to stage IV (PubMed:12643545, PubMed:17081065). The palmitoylated form preferentially localizes to the perinuclear rough ER (PubMed:22314232). {ECO:0000269 PubMed:12643545, ECO:0000269 PubMed:17081065, ECO:0000269 PubMed:22314232}.             |

**Supplemental Table 1 Page 59. All proteins quantitated in study**

| Protein Name                   | Uniprot | Gene  | Subcellular localization                                                                                                                                                                                                                                                                                                                                                                                                                                                                                                                                                                                                                                                                                                                                                                                                                                                                                                                                                                                                                                                                                                                                                                                                                                                                                                                                                                                                                                                                                                                                                                                                                                                                                                                                                                                                                                                                                                                                                                                                                                                                                                                                                                                                                                                                                                                                                                                                                                                                                                                                                                                                                         |
|--------------------------------|---------|-------|--------------------------------------------------------------------------------------------------------------------------------------------------------------------------------------------------------------------------------------------------------------------------------------------------------------------------------------------------------------------------------------------------------------------------------------------------------------------------------------------------------------------------------------------------------------------------------------------------------------------------------------------------------------------------------------------------------------------------------------------------------------------------------------------------------------------------------------------------------------------------------------------------------------------------------------------------------------------------------------------------------------------------------------------------------------------------------------------------------------------------------------------------------------------------------------------------------------------------------------------------------------------------------------------------------------------------------------------------------------------------------------------------------------------------------------------------------------------------------------------------------------------------------------------------------------------------------------------------------------------------------------------------------------------------------------------------------------------------------------------------------------------------------------------------------------------------------------------------------------------------------------------------------------------------------------------------------------------------------------------------------------------------------------------------------------------------------------------------------------------------------------------------------------------------------------------------------------------------------------------------------------------------------------------------------------------------------------------------------------------------------------------------------------------------------------------------------------------------------------------------------------------------------------------------------------------------------------------------------------------------------------------------|
| Histone H1.0                   | P07305  | H1F0  | Nucleus {ECO:0000255 PROSITE-ProRule:PRU00837, ECO:0000269 PubMed:18993075}. Chromosome {ECO:0000255 PROSITE-ProRule:PRU00837, ECO:0000269 PubMed:18993075}. Note=The RNA edited version has been localized to nuclear speckles. During mitosis, it appears in the vicinity of condensed chromosomes.                                                                                                                                                                                                                                                                                                                                                                                                                                                                                                                                                                                                                                                                                                                                                                                                                                                                                                                                                                                                                                                                                                                                                                                                                                                                                                                                                                                                                                                                                                                                                                                                                                                                                                                                                                                                                                                                                                                                                                                                                                                                                                                                                                                                                                                                                                                                            |
| High mobility group protein B1 | P09429  | HMGB1 | Nucleus {ECO:0000269 PubMed:12231511, ECO:0000269 PubMed:17114460, ECO:0000269 PubMed:20819940, ECO:0000269 PubMed:22869893, ECO:0000269 PubMed:27362237}. Chromosome {ECO:0000250 UniProtKB:P10103, ECO:0000250 UniProtKB:P63159, ECO:0000305}. Cytoplasm {ECO:0000269 PubMed:11154118, ECO:0000269 PubMed:12231511, ECO:0000269 PubMed:17114460, ECO:0000269 PubMed:20819940, ECO:0000269 PubMed:22869893}. Secreted {ECO:0000250 UniProtKB:P63158, ECO:0000269 PubMed:12231511, ECO:0000269 PubMed:14532127, ECO:0000269 PubMed:15944249, ECO:0000269 PubMed:19811284, ECO:0000269 PubMed:22869893}. Cell membrane {ECO:0000250 UniProtKB:P63158, ECO:0000250 UniProtKB:P63159, ECO:0000269 PubMed:11154118}; Peripheral membrane protein {ECO:0000250 UniProtKB:P63158, ECO:0000250 UniProtKB:P63159, ECO:0000269 PubMed:11154118}; Extracellular side {ECO:0000250 UniProtKB:P63158, ECO:0000250 UniProtKB:P63159, ECO:0000269 PubMed:11154118}. Endosome {ECO:0000250 UniProtKB:P63158}. Endoplasmic reticulum-Golgi intermediate compartment {ECO:0000250 UniProtKB:P63158}. Note=In basal state predominantly nuclear. Shuttles between the cytoplasm and the nucleus (PubMed:12231511, PubMed:17114460). Translocates from the nucleus to the cytoplasm upon autophagy stimulation (PubMed:20819940). Release from macrophages in the extracellular milieu requires the activation of NLRC4 or NLRP3 inflammasomes (By similarity). Passively released to the extracellular milieu from necrotic cells by diffusion, involving the fully reduced HGMB1 which subsequently gets oxidized (PubMed:19811284). Also released from apoptotic cells (PubMed:16855214, PubMed:18631454). Active secretion from a variety of immune and non-immune cells such as macrophages, monocytes, neutrophils, dendritic cells and natural killer cells in response to various stimuli such as LPS and cytokines involves a nonconventional secretory process via secretory lysosomes (PubMed:12231511, PubMed:14532127, PubMed:15944249). Secreted by plasma cells in response to LPS (By similarity). Found on the surface of activated platelets (PubMed:11154118). An increased chromatin association is observed when associated with the adenovirus protein pVII (PubMed:27362237). {ECO:0000250 UniProtKB:P63158, ECO:0000269 PubMed:11154118, ECO:0000269 PubMed:12231511, ECO:0000269 PubMed:14532127, ECO:0000269 PubMed:15944249, ECO:0000269 PubMed:16855214, ECO:0000269 PubMed:17114460, ECO:0000269 PubMed:18631454, ECO:0000269 PubMed:19811284, ECO:0000269 PubMed:20819940, ECO:0000269 PubMed:27362237, ECO:0000305 PubMed:20123072}. |

**Supplemental Table 1 Page 60. All proteins quantitated in study**

| Protein Name                                                             | Uniprot | Gene    | Subcellular localization                                                                                                                                                                                                                                                                                                                                                                                                                                                                 |
|--------------------------------------------------------------------------|---------|---------|------------------------------------------------------------------------------------------------------------------------------------------------------------------------------------------------------------------------------------------------------------------------------------------------------------------------------------------------------------------------------------------------------------------------------------------------------------------------------------------|
| Voltage-dependent anion-selective channel protein 1                      | P21796  | VDAC1   | Mitochondrion outer membrane {ECO:0000269 PubMed:7539795}; Multi-pass membrane protein {ECO:0000269 PubMed:18755977, ECO:0000269 PubMed:18832158}. Cell membrane {ECO:0000269 PubMed:25168729, ECO:0000269 PubMed:25296756}; Multi-pass membrane protein {ECO:0000269 PubMed:18755977, ECO:0000269 PubMed:18832158}. Membrane raft {ECO:0000269 PubMed:25168729}; Multi-pass membrane protein {ECO:0000269 PubMed:18755977, ECO:0000269 PubMed:18832158}.                                |
| 3-hydroxyisobutyrate dehydrogenase, mitochondrial                        | P31937  | HIBADH  | Mitochondrion.                                                                                                                                                                                                                                                                                                                                                                                                                                                                           |
| 39S ribosomal protein L12, mitochondrial                                 | P52815  | MRPL12  | Mitochondrion {ECO:0000269 PubMed:8626705}.                                                                                                                                                                                                                                                                                                                                                                                                                                              |
| ATP-dependent RNA helicase DDX3X                                         | O00571  | DDX3X   | Nucleus speckle. Cytoplasm. Mitochondrion outer membrane. Note=Located predominantly in nuclear speckles and, at low levels, throughout the cytoplasm. Located to the outer side of nuclear pore complexes (NPC). Shuttles between the nucleus and the cytoplasm in a XPO1 and may be also in a NFX1-dependent manner. Associated with polyadenylated mRNAs in the cytoplasm and the nucleus. Predominantly located in nucleus during G(0) phase and in the cytoplasm during G1/S phase. |
| 40S ribosomal protein S5                                                 | P46782  | RPS5    | 0                                                                                                                                                                                                                                                                                                                                                                                                                                                                                        |
| Beta-actin-like protein 2                                                | Q562R1  | ACTBL2  | Cytoplasm, cytoskeleton {ECO:0000250}.                                                                                                                                                                                                                                                                                                                                                                                                                                                   |
| NADH dehydrogenase [ubiquinone] 1 alpha subcomplex subunit 13            | Q9P0J0  | NDUFA13 | Mitochondrion inner membrane {ECO:0000269 PubMed:12628925, ECO:0000269 PubMed:15059901, ECO:0000269 PubMed:15367666}; Single-pass membrane protein {ECO:0000255}; Matrix side. Nucleus {ECO:0000269 PubMed:12628925}. Note=Localizes mainly in the mitochondrion (PubMed:12628925). May be translocated into the nucleus upon IFN/RA treatment. {ECO:0000269 PubMed:12628925, ECO:0000269 PubMed:15059901}.                                                                              |
| 4-trimethylaminobutyraldehyde dehydrogenase                              | P49189  | ALDH9A1 | Cytoplasm {ECO:0000250}.                                                                                                                                                                                                                                                                                                                                                                                                                                                                 |
| Cytoskeleton-associated protein 4                                        | Q07065  | CKAP4   | Endoplasmic reticulum membrane; Single-pass type II membrane protein. Cell membrane; Single-pass type II membrane protein. Cytoplasm, cytoskeleton. Cytoplasm, perinuclear region. Note=Translocates to the perinuclear region upon APF-stimulation.                                                                                                                                                                                                                                     |
| Cytochrome b-c1 complex subunit 2, mitochondrial                         | P22695  | UQCRC2  | Mitochondrion inner membrane; Peripheral membrane protein; Matrix side.                                                                                                                                                                                                                                                                                                                                                                                                                  |
| Succinate dehydrogenase [ubiquinone] flavoprotein subunit, mitochondrial | P31040  | SDHA    | Mitochondrion inner membrane {ECO:0000250 UniProtKB:Q0QF01}; Peripheral membrane protein {ECO:0000250 UniProtKB:Q0QF01}; Matrix side {ECO:0000250 UniProtKB:Q0QF01}.                                                                                                                                                                                                                                                                                                                     |
| Spectrin beta chain, erythrocytic                                        | P11277  | SPTB    | Cytoplasm, cytoskeleton. Cytoplasm, cell cortex.                                                                                                                                                                                                                                                                                                                                                                                                                                         |

**Supplemental Table 1 Page 61. All proteins quantitated in study**

| Protein Name                                                  | Uniprot | Gene    | Subcellular localization                                                                                                                                                                                                                                                                                                                                                                                                                                                                                                                                                                                                                                                                                                                                                                                                                                                                                                                                                                                                                                                                                                                                                                                                                |
|---------------------------------------------------------------|---------|---------|-----------------------------------------------------------------------------------------------------------------------------------------------------------------------------------------------------------------------------------------------------------------------------------------------------------------------------------------------------------------------------------------------------------------------------------------------------------------------------------------------------------------------------------------------------------------------------------------------------------------------------------------------------------------------------------------------------------------------------------------------------------------------------------------------------------------------------------------------------------------------------------------------------------------------------------------------------------------------------------------------------------------------------------------------------------------------------------------------------------------------------------------------------------------------------------------------------------------------------------------|
| Transitional endoplasmic reticulum ATPase                     | P55072  | VCP     | Cytoplasm, cytosol {ECO:0000269 PubMed:15456787}. Endoplasmic reticulum {ECO:0000269 PubMed:15215856}. Nucleus {ECO:0000269 PubMed:23042605, ECO:0000269 PubMed:26842564}. Cytoplasm, Stress granule {ECO:0000269 PubMed:29804830}. Note=Present in the neuronal hyaline inclusion bodies specifically found in motor neurons from amyotrophic lateral sclerosis patients (PubMed:15456787). Present in the Lewy bodies specifically found in neurons from Parkinson disease patients (PubMed:15456787). Recruited to the cytoplasmic surface of the endoplasmic reticulum via interaction with AMFR/gp78 (PubMed:16168377). Following DNA double-strand breaks, recruited to the sites of damage (PubMed:22120668). Recruited to stalled replication forks via interaction with SPRTN (PubMed:23042605). Recruited to damaged lysosomes decorated with K48-linked ubiquitin chains (PubMed:27753622). Colocalizes with TIA1, ZFAND1 and G3BP1 in cytoplasmic stress granules (SGs) in response to arsenite-induced stress treatment (PubMed:29804830). {ECO:0000269 PubMed:15456787, ECO:0000269 PubMed:16168377, ECO:0000269 PubMed:22120668, ECO:0000269 PubMed:23042605, ECO:0000269 PubMed:27753622, ECO:0000269 PubMed:29804830}. |
| Mitochondrial import inner membrane translocase subunit TIM50 | Q3ZCQ8  | TIMM50  | Mitochondrion inner membrane {ECO:0000269 PubMed:15044455}; Single-pass membrane protein {ECO:0000269 PubMed:15044455}.; Isoform 2: Nucleus speckle {ECO:0000269 PubMed:16008839}. Note=Nuclear and enriched in speckles with snRNPs. {ECO:0000269 PubMed:16008839}.                                                                                                                                                                                                                                                                                                                                                                                                                                                                                                                                                                                                                                                                                                                                                                                                                                                                                                                                                                    |
| Dystrobrevin alpha                                            | Q9Y4J8  | DTNA    | Cytoplasm. Cell junction, synapse. Cell membrane {ECO:0000250}. Note=In peripheral nerves, colocalizes with MAGEE1 in the Schwann cell membrane. {ECO:0000250}.                                                                                                                                                                                                                                                                                                                                                                                                                                                                                                                                                                                                                                                                                                                                                                                                                                                                                                                                                                                                                                                                         |
| Fatty acid-binding protein, heart                             | P05413  | FABP3   | Cytoplasm.                                                                                                                                                                                                                                                                                                                                                                                                                                                                                                                                                                                                                                                                                                                                                                                                                                                                                                                                                                                                                                                                                                                                                                                                                              |
| Acyl-CoA dehydrogenase family member 9, mitochondrial         | Q9H845  | ACAD9   | Mitochondrion {ECO:0000269 PubMed:20816094}.                                                                                                                                                                                                                                                                                                                                                                                                                                                                                                                                                                                                                                                                                                                                                                                                                                                                                                                                                                                                                                                                                                                                                                                            |
| Leucine-rich PPR motif-containing protein, mitochondrial      | P42704  | LRPPRC  | Mitochondrion. Nucleus, nucleoplasm. Nucleus inner membrane. Nucleus outer membrane. Note=Seems to be predominantly mitochondrial.                                                                                                                                                                                                                                                                                                                                                                                                                                                                                                                                                                                                                                                                                                                                                                                                                                                                                                                                                                                                                                                                                                      |
| Prostaglandin reductase 3                                     | Q8N4Q0  | ZADH2   | Peroxisome {ECO:0000250 UniProtKB:Q8BGC4}.                                                                                                                                                                                                                                                                                                                                                                                                                                                                                                                                                                                                                                                                                                                                                                                                                                                                                                                                                                                                                                                                                                                                                                                              |
| Transmembrane protein 205                                     | Q6UW68  | TMEM205 | Membrane {ECO:0000269 PubMed:20589834}; Multi-pass membrane protein {ECO:0000269 PubMed:20589834}. Note=Located on cell surface microvilli. In cancer cells, transition in subcellular location from cell surface to intracellular regions correlates the progression of cisplatin resistance.                                                                                                                                                                                                                                                                                                                                                                                                                                                                                                                                                                                                                                                                                                                                                                                                                                                                                                                                          |
| Aldehyde dehydrogenase, mitochondrial                         | P05091  | ALDH2   | Mitochondrion matrix.                                                                                                                                                                                                                                                                                                                                                                                                                                                                                                                                                                                                                                                                                                                                                                                                                                                                                                                                                                                                                                                                                                                                                                                                                   |

**Supplemental Table 1 Page 62. All proteins quantitated in study**

| Protein Name                                          | Uniprot | Gene   | Subcellular localization                                                                                                                                                                                                                                                                                                                                                                                                                                                                                                                             |
|-------------------------------------------------------|---------|--------|------------------------------------------------------------------------------------------------------------------------------------------------------------------------------------------------------------------------------------------------------------------------------------------------------------------------------------------------------------------------------------------------------------------------------------------------------------------------------------------------------------------------------------------------------|
| Flotillin-1                                           | O75955  | FLOT1  | Cell membrane; Peripheral membrane protein {ECO:0000269 PubMed:20682791}. Endosome {ECO:0000269 PubMed:20682791}. Membrane, caveola {ECO:0000250 UniProtKB:O08917}; Peripheral membrane protein {ECO:0000250 UniProtKB:O08917}. Melanosome {ECO:0000269 PubMed:17081065}. Membrane raft {ECO:0000269 PubMed:25893292}. Note=Identified by mass spectrometry in melanosome fractions from stage I to stage IV (PubMed:17081065). Membrane-associated protein of caveola (By similarity). {ECO:0000250 UniProtKB:O08917, ECO:0000269 PubMed:17081065}. |
| Methylmalonyl-CoA mutase, mitochondrial               | P22033  | MMUT   | Mitochondrion matrix.                                                                                                                                                                                                                                                                                                                                                                                                                                                                                                                                |
| Propionyl-CoA carboxylase beta chain, mitochondrial   | P05166  | PCCB   | Mitochondrion matrix {ECO:0000269 PubMed:16023992}.                                                                                                                                                                                                                                                                                                                                                                                                                                                                                                  |
| Platelet glycoprotein 4                               | P16671  | CD36   | Cell membrane {ECO:0000269 PubMed:16880211}; Multi-pass membrane protein {ECO:0000255}. Membrane raft {ECO:0000269 PubMed:16880211}. Golgi apparatus {ECO:0000269 PubMed:16880211}. Apical cell membrane {ECO:0000250 UniProtKB:Q08857}. Note=Upon ligand-binding, internalized through dynamin-dependent endocytosis. {ECO:0000269 PubMed:20037584}.                                                                                                                                                                                                |
| Band 3 anion transport protein                        | P02730  | SLC4A1 | Cell membrane {ECO:0000269 PubMed:10926824, ECO:0000269 PubMed:24121512, ECO:0000269 PubMed:26542571, ECO:0000269 PubMed:7506871}; Multi-pass membrane protein {ECO:0000269 PubMed:26542571}. Basolateral cell membrane {ECO:0000269 PubMed:7506871}; Multi-pass membrane protein {ECO:0000269 PubMed:7506871}. Note=Detected in the erythrocyte cell membrane and on the basolateral membrane of alpha-intercalated cells in the collecting duct in the kidney. {ECO:0000269 PubMed:7506871}.                                                       |
| Membrane-associated progesterone receptor component 2 | O15173  | PGRMC2 | Membrane {ECO:0000305}; Single-pass membrane protein {ECO:0000305}.                                                                                                                                                                                                                                                                                                                                                                                                                                                                                  |
| Erythrocyte membrane protein band 4.2                 | P16452  | EPB42  | Cell membrane; Lipid-anchor; Cytoplasmic side. Cytoplasm, cytoskeleton. Note=Cytoplasmic surface of erythrocyte membranes.                                                                                                                                                                                                                                                                                                                                                                                                                           |

**Supplemental Table 1 Page 63. All proteins quantitated in study**

| Protein Name                                                             | Uniprot | Gene    | Subcellular localization                                                                                                                                                                                                                                                                                                                                                                                                                                                                                                                                                                                                                                                                                                                                                                                                                                                                                                                                                                                                    |
|--------------------------------------------------------------------------|---------|---------|-----------------------------------------------------------------------------------------------------------------------------------------------------------------------------------------------------------------------------------------------------------------------------------------------------------------------------------------------------------------------------------------------------------------------------------------------------------------------------------------------------------------------------------------------------------------------------------------------------------------------------------------------------------------------------------------------------------------------------------------------------------------------------------------------------------------------------------------------------------------------------------------------------------------------------------------------------------------------------------------------------------------------------|
| Ras-related protein Rab-10                                               | P61026  | RAB10   | Cytoplasmic vesicle membrane {ECO:0000305}; Lipid-anchor {ECO:0000305}; Cytoplasmic side {ECO:0000305}. Golgi apparatus membrane {ECO:0000269 PubMed:23263280}. Golgi apparatus, trans-Golgi network membrane {ECO:0000250 UniProtKB:P24409}. Endosome membrane {ECO:0000269 PubMed:16641372}. Recycling endosome membrane {ECO:0000250 UniProtKB:P24409}. Cytoplasmic vesicle, phagosome membrane {ECO:0000250 UniProtKB:P24409}. Cell projection, cilium {ECO:0000269 PubMed:20576682}. Endoplasmic reticulum membrane {ECO:0000269 PubMed:23263280}. Cytoplasm, perinuclear region {ECO:0000250 UniProtKB:P61027}. Note=Associates with SLC2A4/GLUT4 storage vesicles (PubMed:22908308). Localizes to the base of the cilium (PubMed:20576682). Transiently associates with phagosomes (By similarity). Localizes to the endoplasmic reticulum at domains of new tubule growth (PubMed:23263280). {ECO:0000250 UniProtKB:P24409, ECO:0000269 PubMed:20576682, ECO:0000269 PubMed:22908308, ECO:0000269 PubMed:23263280}. |
| Dolichyl-diphosphooligosaccharide--protein glycosyltransferase subunit 1 | P04843  | RPN1    | Endoplasmic reticulum {ECO:0000250 UniProtKB:E2RQ08, ECO:0000250 UniProtKB:Q9GMB0}. Endoplasmic reticulum membrane; Single-pass type I membrane protein {ECO:0000305}. Melanosome. Note=Identified by mass spectrometry in melanosome fractions from stage I to stage IV.                                                                                                                                                                                                                                                                                                                                                                                                                                                                                                                                                                                                                                                                                                                                                   |
| Enoyl-CoA delta isomerase 1, mitochondrial                               | P42126  | ECI1    | Mitochondrion matrix.                                                                                                                                                                                                                                                                                                                                                                                                                                                                                                                                                                                                                                                                                                                                                                                                                                                                                                                                                                                                       |
| Estradiol 17-beta-dehydrogenase 8                                        | Q92506  | HSD17B8 | Mitochondrion matrix {ECO:0000269 PubMed:19571038}.                                                                                                                                                                                                                                                                                                                                                                                                                                                                                                                                                                                                                                                                                                                                                                                                                                                                                                                                                                         |
| Delta(3,5)-Delta(2,4)-dienoyl-CoA isomerase, mitochondrial               | Q13011  | ECH1    | Mitochondrion {ECO:0000250}. Peroxisome {ECO:0000250}.                                                                                                                                                                                                                                                                                                                                                                                                                                                                                                                                                                                                                                                                                                                                                                                                                                                                                                                                                                      |
| Sodium/potassium-transporting ATPase subunit alpha-2                     | P50993  | ATP1A2  | Membrane {ECO:0000269 PubMed:7711835}; Multi-pass membrane protein {ECO:0000269 PubMed:7711835}. Cell membrane {ECO:0000269 PubMed:7711835}; Multi-pass membrane protein {ECO:0000269 PubMed:7711835}.                                                                                                                                                                                                                                                                                                                                                                                                                                                                                                                                                                                                                                                                                                                                                                                                                      |
| Catechol O-methyltransferase domain-containing protein 1                 | Q86VU5  | COMTD1  | Membrane {ECO:0000305}; Single-pass type II membrane protein {ECO:0000305}.                                                                                                                                                                                                                                                                                                                                                                                                                                                                                                                                                                                                                                                                                                                                                                                                                                                                                                                                                 |
| Keratin, type I cytoskeletal 10                                          | P13645  | KRT10   | Secreted, extracellular space {ECO:0000269 PubMed:12427098}. Cell surface {ECO:0000269 PubMed:19627498}. Note=Localized on the surface of desquamated nasal epithelial cells (PubMed:12427098). Localized on the surface of lung cell lines (PubMed:19627498). {ECO:0000269 PubMed:12427098, ECO:0000269 PubMed:19627498}.                                                                                                                                                                                                                                                                                                                                                                                                                                                                                                                                                                                                                                                                                                  |
| Alpha-crystallin B chain                                                 | P02511  | CRYAB   | Cytoplasm {ECO:0000269 PubMed:19464326, ECO:0000269 PubMed:28493373}. Nucleus {ECO:0000269 PubMed:19464326}. Note=Translocates to the nucleus during heat shock and resides in sub-nuclear structures known as SC35 speckles or nuclear splicing speckles (PubMed:19464326). Localizes at the Z-bands and the intercalated disk in cardiomyocytes (PubMed:28493373). {ECO:0000269 PubMed:19464326, ECO:0000269 PubMed:28493373}.                                                                                                                                                                                                                                                                                                                                                                                                                                                                                                                                                                                            |

**Supplemental Table 1 Page 64. All proteins quantitated in study**

| Protein Name                                                         | Uniprot | Gene    | Subcellular localization                                                                                                                                                                                                                                                                                                                                                                                                                                                                                                                                                                                                                                                                                                                         |
|----------------------------------------------------------------------|---------|---------|--------------------------------------------------------------------------------------------------------------------------------------------------------------------------------------------------------------------------------------------------------------------------------------------------------------------------------------------------------------------------------------------------------------------------------------------------------------------------------------------------------------------------------------------------------------------------------------------------------------------------------------------------------------------------------------------------------------------------------------------------|
| Inorganic pyrophosphatase 2, mitochondrial                           | Q9H2U2  | PPA2    | Mitochondrion {ECO:0000305}.                                                                                                                                                                                                                                                                                                                                                                                                                                                                                                                                                                                                                                                                                                                     |
| NADH dehydrogenase [ubiquinone] iron-sulfur protein 7, mitochondrial | O75251  | NDUFS7  | Mitochondrion {ECO:0000305 PubMed:12611891}.                                                                                                                                                                                                                                                                                                                                                                                                                                                                                                                                                                                                                                                                                                     |
| Cytosol aminopeptidase                                               | P28838  | LAP3    | Cytoplasm.                                                                                                                                                                                                                                                                                                                                                                                                                                                                                                                                                                                                                                                                                                                                       |
| NADH dehydrogenase [ubiquinone] 1 beta subcomplex subunit 1          | O75438  | NDUFB1  | Mitochondrion inner membrane {ECO:0000305 PubMed:12611891}; Single-pass membrane protein {ECO:0000255}; Matrix side {ECO:0000305}.                                                                                                                                                                                                                                                                                                                                                                                                                                                                                                                                                                                                               |
| Iron-sulfur protein NUBPL                                            | Q8TB37  | NUBPL   | Mitochondrion {ECO:0000269 PubMed:19752196}.                                                                                                                                                                                                                                                                                                                                                                                                                                                                                                                                                                                                                                                                                                     |
| Very long-chain specific acyl-CoA dehydrogenase, mitochondrial       | P49748  | ACADVL  | Mitochondrion inner membrane.                                                                                                                                                                                                                                                                                                                                                                                                                                                                                                                                                                                                                                                                                                                    |
| Complement component 1 Q subcomponent-binding protein, mitochondrial | Q07021  | C1QBP   | Mitochondrion matrix {ECO:0000269 PubMed:15031724, ECO:0000269 PubMed:17486078, ECO:0000269 PubMed:19164550, ECO:0000269 PubMed:9305894}. Nucleus {ECO:0000269 PubMed:18676636}. Cell membrane {ECO:0000269 PubMed:10747014, ECO:0000269 PubMed:11493647, ECO:0000269 PubMed:12574814, ECO:0000269 PubMed:8195709, ECO:0000269 PubMed:8662673, ECO:0000269 PubMed:9191880, ECO:0000269 PubMed:9233640}; Peripheral membrane protein {ECO:0000269 PubMed:12574814, ECO:0000269 PubMed:8662673, ECO:0000269 PubMed:9191880}; Extracellular side. Secreted. Cytoplasm {ECO:0000269 PubMed:11493647}. Nucleus, nucleolus {ECO:0000269 PubMed:21536856}. Note=Seems to be predominantly localized to mitochondria. Secreted by activated lymphocytes. |
| Dihydroorotate dehydrogenase (quinone), mitochondrial                | Q02127  | DHODH   | Mitochondrion inner membrane {ECO:0000269 PubMed:10727948}; Single-pass membrane protein {ECO:0000269 PubMed:10727948}.                                                                                                                                                                                                                                                                                                                                                                                                                                                                                                                                                                                                                          |
| Reticulon-4-interacting protein 1, mitochondrial                     | Q8WWV3  | RTN4IP1 | Mitochondrion outer membrane {ECO:0000269 PubMed:12067236, ECO:0000269 PubMed:26593267}. Note=Colocalizes with the endoplasmic reticulum HSPA5 at spots corresponding to contacts with mitochondria. {ECO:0000269 PubMed:26593267}.                                                                                                                                                                                                                                                                                                                                                                                                                                                                                                              |
| Fatty aldehyde dehydrogenase                                         | P51648  | ALDH3A2 | Microsome membrane {ECO:0000269 PubMed:9133646}; Single-pass membrane protein {ECO:0000305 PubMed:25047030, ECO:0000305 PubMed:9133646}. Endoplasmic reticulum membrane {ECO:0000305 PubMed:9133646}; Single-pass membrane protein {ECO:0000305 PubMed:25047030, ECO:0000305 PubMed:9133646}; Cytoplasmic side {ECO:0000250 UniProtKB:P30839}.                                                                                                                                                                                                                                                                                                                                                                                                   |
| Sorting and assembly machinery component 50 homolog                  | Q9Y512  | SAMM50  | Mitochondrion outer membrane {ECO:0000269 PubMed:15644312}; Multi-pass membrane protein. Cytoplasm {ECO:0000250 UniProtKB:Q6AXV4}. Mitochondrion {ECO:0000269 PubMed:25781180}.                                                                                                                                                                                                                                                                                                                                                                                                                                                                                                                                                                  |
| Methylcrotonoyl-CoA carboxylase beta chain, mitochondrial            | Q9HCC0  | MCCC2   | Mitochondrion matrix {ECO:0000269 PubMed:11170888, ECO:0000269 PubMed:16023992}.                                                                                                                                                                                                                                                                                                                                                                                                                                                                                                                                                                                                                                                                 |
| Fibrinogen alpha chain                                               | P02671  | FGA     | Secreted {ECO:0000269 PubMed:19296670, ECO:0000269 PubMed:9628725}.                                                                                                                                                                                                                                                                                                                                                                                                                                                                                                                                                                                                                                                                              |

**Supplemental Table 1 Page 65. All proteins quantitated in study**

| Protein Name                                                         | Uniprot | Gene   | Subcellular localization                                                                                                                                                                                                                                                                                                                                                                                                                                                                                                                                                                                                                                                                                                                                                                                                                                                                                                                                                                                                                                                                                                                             |
|----------------------------------------------------------------------|---------|--------|------------------------------------------------------------------------------------------------------------------------------------------------------------------------------------------------------------------------------------------------------------------------------------------------------------------------------------------------------------------------------------------------------------------------------------------------------------------------------------------------------------------------------------------------------------------------------------------------------------------------------------------------------------------------------------------------------------------------------------------------------------------------------------------------------------------------------------------------------------------------------------------------------------------------------------------------------------------------------------------------------------------------------------------------------------------------------------------------------------------------------------------------------|
| Methylcrotonoyl-CoA carboxylase subunit alpha, mitochondrial         | Q96RQ3  | MCCC1  | Mitochondrion matrix {ECO:0000269 PubMed:16023992}.                                                                                                                                                                                                                                                                                                                                                                                                                                                                                                                                                                                                                                                                                                                                                                                                                                                                                                                                                                                                                                                                                                  |
| Short-chain specific acyl-CoA dehydrogenase, mitochondrial           | P16219  | ACADS  | Mitochondrion matrix.                                                                                                                                                                                                                                                                                                                                                                                                                                                                                                                                                                                                                                                                                                                                                                                                                                                                                                                                                                                                                                                                                                                                |
| 40S ribosomal protein S10                                            | P46783  | RPS10  | Cytoplasm {ECO:0000269 PubMed:20159986}. Nucleus, nucleolus {ECO:0000269 PubMed:20159986}. Note=Localized in the granular component (GC) region of the nucleolus. Methylation is required for its localization in the GC region. Colocalizes with NPS1 in the GC region of the nucleolus.                                                                                                                                                                                                                                                                                                                                                                                                                                                                                                                                                                                                                                                                                                                                                                                                                                                            |
| Protein/nucleic acid deglycase DJ-1                                  | Q99497  | PARK7  | Cell membrane {ECO:0000250 UniProtKB:Q99LX0}; Lipid-anchor {ECO:0000250 UniProtKB:Q99LX0}. Cytoplasm {ECO:0000269 PubMed:12851414, ECO:0000269 PubMed:14579415, ECO:0000269 PubMed:15976810, ECO:0000269 PubMed:19229105, ECO:0000269 PubMed:28596309}. Nucleus {ECO:0000269 PubMed:12851414, ECO:0000269 PubMed:14579415, ECO:0000269 PubMed:15976810, ECO:0000269 PubMed:16390825, ECO:0000269 PubMed:28596309}. Membrane raft {ECO:0000250 UniProtKB:O88767}. Mitochondrion {ECO:0000269 PubMed:15181200, ECO:0000269 PubMed:18711745, ECO:0000269 PubMed:19229105}. Note=Under normal conditions, located predominantly in the cytoplasm and, to a lesser extent, in the nucleus and mitochondrion. Translocates to the mitochondrion and subsequently to the nucleus in response to oxidative stress and exerts an increased cytoprotective effect against oxidative damage (PubMed:18711745). Detected in tau inclusions in brains from neurodegenerative disease patients (PubMed:14705119). Membrane raft localization in astrocytes and neuronal cells requires palmitoylation. {ECO:0000269 PubMed:14705119, ECO:0000269 PubMed:18711745}. |
| NADH dehydrogenase [ubiquinone] iron-sulfur protein 4, mitochondrial | O43181  | NDUFS4 | Mitochondrion inner membrane {ECO:0000269 PubMed:12611891}; Peripheral membrane protein {ECO:0000269 PubMed:12611891}; Matrix side {ECO:0000269 PubMed:12611891}.                                                                                                                                                                                                                                                                                                                                                                                                                                                                                                                                                                                                                                                                                                                                                                                                                                                                                                                                                                                    |
| Erlin-2                                                              | O94905  | ERLIN2 | Endoplasmic reticulum membrane {ECO:0000269 PubMed:16835267, ECO:0000269 PubMed:17502376, ECO:0000269 PubMed:19240031}; Single-pass type II membrane protein {ECO:0000269 PubMed:16835267, ECO:0000269 PubMed:17502376, ECO:0000269 PubMed:19240031}. Note=Associated with lipid raft-like domains of the endoplasmic reticulum membrane.                                                                                                                                                                                                                                                                                                                                                                                                                                                                                                                                                                                                                                                                                                                                                                                                            |
| Triosephosphate isomerase                                            | P60174  | TPI1   | Cytoplasm {ECO:0000255 PROSITE-ProRule:PRU10127}.                                                                                                                                                                                                                                                                                                                                                                                                                                                                                                                                                                                                                                                                                                                                                                                                                                                                                                                                                                                                                                                                                                    |
| Acyl-CoA synthetase family member 2, mitochondrial                   | Q96CM8  | ACSF2  | Mitochondrion {ECO:0000305}.                                                                                                                                                                                                                                                                                                                                                                                                                                                                                                                                                                                                                                                                                                                                                                                                                                                                                                                                                                                                                                                                                                                         |

**Supplemental Table 1 Page 66. All proteins quantitated in study**

| Protein Name                                         | Uniprot | Gene    | Subcellular localization                                                                                                                                                                                                                                                                                                                                                                                                                                                                                                                    |
|------------------------------------------------------|---------|---------|---------------------------------------------------------------------------------------------------------------------------------------------------------------------------------------------------------------------------------------------------------------------------------------------------------------------------------------------------------------------------------------------------------------------------------------------------------------------------------------------------------------------------------------------|
| PRA1 family protein 3                                | O75915  | ARL6IP5 | Endoplasmic reticulum membrane {ECO:0000250 UniProtKB:Q9ES40}; Multi-pass membrane protein {ECO:0000255}. Cell membrane {ECO:0000250 UniProtKB:Q9ES40}; Multi-pass membrane protein {ECO:0000255}. Cytoplasm {ECO:0000250 UniProtKB:Q9ES40}. Cytoplasm, cytoskeleton {ECO:0000250 UniProtKB:Q9ES40}. Note=Also exists as a soluble form in the cytoplasm. Associated with microtubules. {ECO:0000250 UniProtKB:Q9ES40}.                                                                                                                     |
| Stress-70 protein, mitochondrial                     | P38646  | HSPA9   | Mitochondrion {ECO:0000269 PubMed:22002106, ECO:0000269 PubMed:26702583}. Nucleus, nucleolus {ECO:0000269 PubMed:22002106}.                                                                                                                                                                                                                                                                                                                                                                                                                 |
| Endoplasmic reticulum aminopeptidase 1               | Q9NZ08  | ERAP1   | Endoplasmic reticulum membrane {ECO:0000305 PubMed:15908954}; Single-pass type II membrane protein {ECO:0000305 PubMed:15908954}.                                                                                                                                                                                                                                                                                                                                                                                                           |
| Neutral alpha-glucosidase AB                         | Q14697  | GANAB   | Endoplasmic reticulum {ECO:0000305 PubMed:10929008}. Golgi apparatus {ECO:0000250 UniProtKB:P79403}. Melanosome {ECO:0000269 PubMed:17081065}. Note=Identified by mass spectrometry in melanosome fractions from stage I to stage IV. {ECO:0000269 PubMed:17081065}.                                                                                                                                                                                                                                                                        |
| Serine--tRNA ligase, mitochondrial                   | Q9NP81  | SARS2   | Mitochondrion matrix {ECO:0000250 UniProtKB:Q9N0F3}.                                                                                                                                                                                                                                                                                                                                                                                                                                                                                        |
| Ubiquinone biosynthesis protein COQ9, mitochondrial  | O75208  | COQ9    | Mitochondrion {ECO:0000250 UniProtKB:Q8K1Z0}.                                                                                                                                                                                                                                                                                                                                                                                                                                                                                               |
| Transmembrane protein 11, mitochondrial              | P17152  | TMEM11  | Mitochondrion inner membrane {ECO:0000269 PubMed:21274005}; Multi-pass membrane protein {ECO:0000269 PubMed:21274005}.                                                                                                                                                                                                                                                                                                                                                                                                                      |
| Cytosolic 5'-nucleotidase 1A                         | Q9BXI3  | NT5C1A  | Cytoplasm.                                                                                                                                                                                                                                                                                                                                                                                                                                                                                                                                  |
| Inactive hydroxysteroid dehydrogenase-like protein 1 | Q3SXM5  | HSDL1   | Mitochondrion {ECO:0000269 PubMed:19026618}.                                                                                                                                                                                                                                                                                                                                                                                                                                                                                                |
| DnaJ homolog subfamily C member 11                   | Q9NVH1  | DNAJC11 | Mitochondrion {ECO:0000269 PubMed:25997101}. Note=Isoforms show differential submitochondrial localization. A 57 kDa form (potentially isoform 3) shows either mitochondrial matrix or innermembrane (IM) localization, possibly anchored to the IM facing the matrix. A 35 kDa form behaved either as an inner membrane space (IMS) or an IM protein exposed to the IMS. {ECO:0000269 PubMed:25111180}.; Isoform 1: Mitochondrion outer membrane {ECO:0000269 PubMed:25111180}; Peripheral membrane protein {ECO:0000269 PubMed:25111180}. |
| 78 kDa glucose-regulated protein                     | P11021  | HSPA5   | Endoplasmic reticulum lumen {ECO:0000269 PubMed:21080038, ECO:0000269 PubMed:21289099, ECO:0000269 PubMed:23990668, ECO:0000269 PubMed:29497057}. Melanosome {ECO:0000269 PubMed:12643545}. Cytoplasm {ECO:0000250 UniProtKB:P20029}. Note=Identified by mass spectrometry in melanosome fractions from stage I to stage IV. {ECO:0000269 PubMed:12643545}.                                                                                                                                                                                 |
| 3-hydroxyisobutyryl-CoA hydrolase, mitochondrial     | Q6NVY1  | HIBCH   | Mitochondrion {ECO:0000250}.                                                                                                                                                                                                                                                                                                                                                                                                                                                                                                                |
| OCIA domain-containing protein 1                     | Q9NX40  | OCIAD1  | Endosome {ECO:0000250 UniProtKB:Q9CRD0}.                                                                                                                                                                                                                                                                                                                                                                                                                                                                                                    |

**Supplemental Table 1 Page 67. All proteins quantitated in study**

| Protein Name                                                                | Uniprot | Gene    | Subcellular localization                                                                                                                                                                                                                                                                                                                                                                                                                                                                                                                                                                                                                                                                                                                                                                                                                                                                                                                                                                                                                                                                                                                                                                                       |
|-----------------------------------------------------------------------------|---------|---------|----------------------------------------------------------------------------------------------------------------------------------------------------------------------------------------------------------------------------------------------------------------------------------------------------------------------------------------------------------------------------------------------------------------------------------------------------------------------------------------------------------------------------------------------------------------------------------------------------------------------------------------------------------------------------------------------------------------------------------------------------------------------------------------------------------------------------------------------------------------------------------------------------------------------------------------------------------------------------------------------------------------------------------------------------------------------------------------------------------------------------------------------------------------------------------------------------------------|
| Stomatin-like protein 2, mitochondrial                                      | Q9UJZ1  | STOML2  | Cell membrane {ECO:0000269 PubMed:10713127, ECO:0000269 PubMed:18641330, ECO:0000269 PubMed:21746876, ECO:0000269 PubMed:22623988}; Peripheral membrane protein {ECO:0000269 PubMed:10713127}. Mitochondrion {ECO:0000269 PubMed:18641330, ECO:0000269 PubMed:19597348, ECO:0000269 PubMed:22623988}. Mitochondrion inner membrane {ECO:0000269 PubMed:17121834, ECO:0000269 PubMed:18339324, ECO:0000269 PubMed:21746876}; Lipid-anchor {ECO:0000269 PubMed:21746876}. Mitochondrion intermembrane space {ECO:0000269 PubMed:17121834}. Membrane raft {ECO:0000269 PubMed:18641330}. Cytoplasm, cytoskeleton {ECO:0000269 PubMed:10713127, ECO:0000269 PubMed:18641330}. Note=Behaves as an integral membrane protein of the mitochondrion despite the absence of a detectable transmembrane domain (PubMed:21746876). Also associates with the actin cytoskeleton and membrane rafts in activated T-cells (PubMed:18641330, PubMed:10713127). A minor pool is associated with the plasma membrane and is enriched at the immunological synapse in activated T-cells (PubMed:22623988). {ECO:0000269 PubMed:10713127, ECO:0000269 PubMed:18641330, ECO:0000269 PubMed:21746876, ECO:0000269 PubMed:22623988}. |
| MICOS complex subunit MIC26                                                 | Q9BUR5  | APOO    | Mitochondrion inner membrane {ECO:0000269 PubMed:25764979}; Single-pass membrane protein {ECO:0000255}. Secreted {ECO:0000269 PubMed:16956892, ECO:0000269 PubMed:25764979}. Mitochondrion {ECO:0000269 PubMed:25781180}. Golgi apparatus membrane {ECO:0000269 PubMed:25764979}. Endoplasmic reticulum membrane {ECO:0000269 PubMed:25764979}. Note=Exists in three distinct forms: a glycosylated and secreted form, an ER/Golgi-resident form and a non-glycosylated mitochondrial form. {ECO:0000269 PubMed:25764979}.                                                                                                                                                                                                                                                                                                                                                                                                                                                                                                                                                                                                                                                                                     |
| Short/branched chain specific acyl-CoA dehydrogenase, mitochondrial         | P45954  | ACADSB  | Mitochondrion matrix.                                                                                                                                                                                                                                                                                                                                                                                                                                                                                                                                                                                                                                                                                                                                                                                                                                                                                                                                                                                                                                                                                                                                                                                          |
| Methylmalonate-semialdehyde dehydrogenase [acylating], mitochondrial        | Q02252  | ALDH6A1 | Mitochondrion.                                                                                                                                                                                                                                                                                                                                                                                                                                                                                                                                                                                                                                                                                                                                                                                                                                                                                                                                                                                                                                                                                                                                                                                                 |
| 60S acidic ribosomal protein P1                                             | P05386  | RPLP1   | 0                                                                                                                                                                                                                                                                                                                                                                                                                                                                                                                                                                                                                                                                                                                                                                                                                                                                                                                                                                                                                                                                                                                                                                                                              |
| NADH dehydrogenase [ubiquinone] 1 alpha subcomplex subunit 9, mitochondrial | Q16795  | NDUFA9  | Mitochondrion matrix {ECO:0000305 PubMed:12611891}.                                                                                                                                                                                                                                                                                                                                                                                                                                                                                                                                                                                                                                                                                                                                                                                                                                                                                                                                                                                                                                                                                                                                                            |
| Probable 2-oxoglutarate dehydrogenase E1 component DHKTD1, mitochondrial    | Q96HY7  | DHTKD1  | Mitochondrion {ECO:0000269 PubMed:23141294}.                                                                                                                                                                                                                                                                                                                                                                                                                                                                                                                                                                                                                                                                                                                                                                                                                                                                                                                                                                                                                                                                                                                                                                   |

**Supplemental Table 1 Page 68. All proteins quantitated in study**

| Protein Name                                                | Uniprot | Gene   | Subcellular localization                                                                                                                                                                                                                                                                                                                                                                                                                                                                                                     |
|-------------------------------------------------------------|---------|--------|------------------------------------------------------------------------------------------------------------------------------------------------------------------------------------------------------------------------------------------------------------------------------------------------------------------------------------------------------------------------------------------------------------------------------------------------------------------------------------------------------------------------------|
| Fumarate hydratase, mitochondrial                           | P07954  | FH     | Isoform Mitochondrial: Mitochondrion {ECO:0000269 PubMed:27037871}.; Isoform Cytoplasmic: Cytoplasm, cytosol {ECO:0000269 PubMed:20231875, ECO:0000269 PubMed:22509282, ECO:0000269 PubMed:26237645, ECO:0000269 PubMed:27037871}. Nucleus {ECO:0000269 PubMed:20231875, ECO:0000269 PubMed:26237645}. Chromosome {ECO:0000269 PubMed:26237645}. Note=Translocates to the nucleus in response to DNA damage: localizes to DNA double-strand breaks (DSBs) following phosphorylation by PRKDC. {ECO:0000269 PubMed:26237645}. |
| Calsequestrin-2                                             | O14958  | CASQ2  | Sarcoplasmic reticulum lumen {ECO:0000250 UniProtKB:O09161}. Note=This isoform of calsequestrin occurs in the sarcoplasmic reticulum's terminal cisternae luminal spaces of cardiac and slow skeletal muscle cells. {ECO:0000250 UniProtKB:O09161}.                                                                                                                                                                                                                                                                          |
| Mitochondrial import receptor subunit TOM22 homolog         | Q9NS69  | TOMM22 | Mitochondrion outer membrane {ECO:0000269 PubMed:10982837}; Single-pass membrane protein {ECO:0000269 PubMed:10982837}.                                                                                                                                                                                                                                                                                                                                                                                                      |
| Cytochrome c                                                | P99999  | CYCS   | Mitochondrion intermembrane space. Note=Loosely associated with the inner membrane.                                                                                                                                                                                                                                                                                                                                                                                                                                          |
| Extended synaptotagmin-1                                    | Q9BSJ8  | ESYT1  | Endoplasmic reticulum membrane {ECO:0000269 PubMed:29469807}; Multi-pass membrane protein. Cell membrane {ECO:0000269 PubMed:29469807}; Peripheral membrane protein. Note=Localizes primarily to the endoplasmic reticulum. Recruited to sites of contact between the endoplasmic reticulum and the cell membrane in response to increased cytosolic calcium levels. {ECO:0000269 PubMed:29469807}.                                                                                                                          |
| NADH-ubiquinone oxidoreductase chain 1                      | P03886  | MT-ND1 | Mitochondrion inner membrane {ECO:0000250}; Multi-pass membrane protein {ECO:0000250}.                                                                                                                                                                                                                                                                                                                                                                                                                                       |
| Carnitine O-acetyltransferase                               | P43155  | CRAT   | Endoplasmic reticulum {ECO:0000305}. Peroxisome {ECO:0000305}. Mitochondrion inner membrane {ECO:0000305}; Peripheral membrane protein {ECO:0000305}; Matrix side {ECO:0000305}.; Isoform 1: Mitochondrion {ECO:0000305}.; Isoform 2: Peroxisome {ECO:0000305}.                                                                                                                                                                                                                                                              |
| Beta-sarcoglycan                                            | Q16585  | SGCB   | Cell membrane, sarcolemma {ECO:0000250}; Single-pass type II membrane protein {ECO:0000250}. Cytoplasm, cytoskeleton {ECO:0000250}.                                                                                                                                                                                                                                                                                                                                                                                          |
| Rab GDP dissociation inhibitor beta                         | P50395  | GDI2   | Cytoplasm {ECO:0000250}. Membrane {ECO:0000250}; Peripheral membrane protein {ECO:0000250}.                                                                                                                                                                                                                                                                                                                                                                                                                                  |
| Transcription factor A, mitochondrial                       | Q00059  | TFAM   | Mitochondrion {ECO:0000269 PubMed:1737790, ECO:0000269 PubMed:18063578, ECO:0000269 PubMed:22841477, ECO:0000269 PubMed:29445193}. Mitochondrion matrix, mitochondrion nucleoid {ECO:0000269 PubMed:18063578}.                                                                                                                                                                                                                                                                                                               |
| T-complex protein 1 subunit epsilon                         | P48643  | CCT5   | Cytoplasm {ECO:0000269 PubMed:20080638}. Cytoplasm, cytoskeleton, microtubule organizing center, centrosome {ECO:0000269 PubMed:14654843, ECO:0000269 PubMed:20080638}.                                                                                                                                                                                                                                                                                                                                                      |
| Histidine triad nucleotide-binding protein 2, mitochondrial | Q9BX68  | HINT2  | Mitochondrion {ECO:0000269 PubMed:16762638, ECO:0000269 PubMed:18653718}.                                                                                                                                                                                                                                                                                                                                                                                                                                                    |
| Trimethyllysine dioxygenase, mitochondrial                  | Q9NVH6  | TMLHE  | Mitochondrion matrix {ECO:0000269 PubMed:15754339}.                                                                                                                                                                                                                                                                                                                                                                                                                                                                          |

**Supplemental Table 1 Page 69. All proteins quantitated in study**

| Protein Name                                                               | Uniprot | Gene   | Subcellular localization                                                                                                                                                                                                                                                                                                                                                                                                                                                              |
|----------------------------------------------------------------------------|---------|--------|---------------------------------------------------------------------------------------------------------------------------------------------------------------------------------------------------------------------------------------------------------------------------------------------------------------------------------------------------------------------------------------------------------------------------------------------------------------------------------------|
| Probable D-lactate dehydrogenase, mitochondrial                            | Q86WU2  | LDHD   | Mitochondrion {ECO:0000250 UniProtKB:Q7TNG8}.                                                                                                                                                                                                                                                                                                                                                                                                                                         |
| Histone H2A.V                                                              | Q71UI9  | H2AFV  | Nucleus {ECO:0000250}. Chromosome {ECO:0000250}.                                                                                                                                                                                                                                                                                                                                                                                                                                      |
| Dihydrolipoyl dehydrogenase, mitochondrial                                 | P09622  | DLD    | Mitochondrion matrix {ECO:0000305 PubMed:29211711, ECO:0000305 PubMed:3693355}. Nucleus {ECO:0000269 PubMed:29211711}. Cell projection, cilium, flagellum {ECO:0000250 UniProtKB:Q811C4}. Cytoplasmic vesicle, secretory vesicle, acrosome {ECO:0000269 PubMed:15888450}. Note=Mainly localizes in the mitochondrion. A small fraction localizes to the nucleus, where the 2-oxoglutarate dehydrogenase complex is required for histone succinylation. {ECO:0000269 PubMed:29211711}. |
| NADH dehydrogenase [ubiquinone] 1 alpha subcomplex subunit 2               | O43678  | NDUFA2 | Mitochondrion inner membrane {ECO:0000305 PubMed:12611891}; Peripheral membrane protein {ECO:0000305}; Matrix side {ECO:0000305}.                                                                                                                                                                                                                                                                                                                                                     |
| Diablo homolog, mitochondrial                                              | Q9NR28  | DIABLO | Mitochondrion {ECO:0000269 PubMed:14523016}. Note=Released into the cytosol when cells undergo apoptosis.                                                                                                                                                                                                                                                                                                                                                                             |
| Elongation factor 1-gamma                                                  | P26641  | EEF1G  | 0                                                                                                                                                                                                                                                                                                                                                                                                                                                                                     |
| Actin, alpha skeletal muscle                                               | P68133  | ACTA1  | Cytoplasm, cytoskeleton.                                                                                                                                                                                                                                                                                                                                                                                                                                                              |
| Branched-chain-amino-acid aminotransferase, mitochondrial                  | O15382  | BCAT2  | Isoform A: Mitochondrion.; Isoform B: Cytoplasm.                                                                                                                                                                                                                                                                                                                                                                                                                                      |
| Propionyl-CoA carboxylase alpha chain, mitochondrial                       | P05165  | PCCA   | Mitochondrion matrix {ECO:0000269 PubMed:16023992}.                                                                                                                                                                                                                                                                                                                                                                                                                                   |
| Carnitine O-palmitoyltransferase 1, muscle isoform                         | Q92523  | CPT1B  | Mitochondrion outer membrane; Multi-pass membrane protein.                                                                                                                                                                                                                                                                                                                                                                                                                            |
| NADH dehydrogenase [ubiquinone] 1 beta subcomplex subunit 8, mitochondrial | O95169  | NDUFB8 | Mitochondrion inner membrane {ECO:0000305 PubMed:12611891}; Single-pass membrane protein {ECO:0000255}; Matrix side {ECO:0000305}.                                                                                                                                                                                                                                                                                                                                                    |
| Succinate--CoA ligase [GDP-forming] subunit beta, mitochondrial            | Q96I99  | SUCLG2 | Mitochondrion {ECO:0000255 HAMAP-Rule:MF_03221}.                                                                                                                                                                                                                                                                                                                                                                                                                                      |
| 3-ketoacyl-CoA thiolase, mitochondrial                                     | P42765  | ACAA2  | Mitochondrion {ECO:0000269 PubMed:18371312}. Note=Colocalizes with BNIP3 in the mitochondria.                                                                                                                                                                                                                                                                                                                                                                                         |
| Filamin-A                                                                  | P21333  | FLNA   | Cytoplasm, cell cortex. Cytoplasm, cytoskeleton.                                                                                                                                                                                                                                                                                                                                                                                                                                      |

**Supplemental Table 1 Page 70. All proteins quantitated in study**

| Protein Name | Uniprot | Gene | Subcellular localization                                                                                                                                                                                                                                                                                                                                                                                                                                                                                                                                                                                                                                                                                                                                                                                                                                                                                                                                                                                                                                                                                                                                                                                                                                                                                                                                                                                                                                                                                                                                                                                                                                                                                                                                                                                                                                                                                                                                                                                                                                                                                                                                                                                                                                                                                                                                                                                                                                                                                                                                                                                                                                                                                                                                                                             |
|--------------|---------|------|------------------------------------------------------------------------------------------------------------------------------------------------------------------------------------------------------------------------------------------------------------------------------------------------------------------------------------------------------------------------------------------------------------------------------------------------------------------------------------------------------------------------------------------------------------------------------------------------------------------------------------------------------------------------------------------------------------------------------------------------------------------------------------------------------------------------------------------------------------------------------------------------------------------------------------------------------------------------------------------------------------------------------------------------------------------------------------------------------------------------------------------------------------------------------------------------------------------------------------------------------------------------------------------------------------------------------------------------------------------------------------------------------------------------------------------------------------------------------------------------------------------------------------------------------------------------------------------------------------------------------------------------------------------------------------------------------------------------------------------------------------------------------------------------------------------------------------------------------------------------------------------------------------------------------------------------------------------------------------------------------------------------------------------------------------------------------------------------------------------------------------------------------------------------------------------------------------------------------------------------------------------------------------------------------------------------------------------------------------------------------------------------------------------------------------------------------------------------------------------------------------------------------------------------------------------------------------------------------------------------------------------------------------------------------------------------------------------------------------------------------------------------------------------------------|
| Clusterin    | P10909  | CLU  | <p>Isoform 1: Secreted {ECO:0000269 PubMed:11123922, ECO:0000269 PubMed:17260971, ECO:0000269 PubMed:17412999, ECO:0000269 PubMed:17451556, ECO:0000269 PubMed:2387851, ECO:0000269 PubMed:24073260, ECO:0000269 PubMed:2780565, ECO:0000269 PubMed:3154963, ECO:0000269 PubMed:8292612, ECO:0000269 PubMed:8328966}. Note=Can retrotranslocate from the secretory compartments to the cytosol upon cellular stress. {ECO:0000269 PubMed:17451556}.; Isoform 4: Cytoplasm {ECO:0000269 PubMed:24073260}. Note=Keeps cytoplasmic localization in stressed and unstressed cell. {ECO:0000269 PubMed:24073260}.; Isoform 6: Cytoplasm {ECO:0000269 PubMed:24073260}. Note=Keeps cytoplasmic localization in stressed and unstressed cell. {ECO:0000269 PubMed:24073260}.; Nucleus {ECO:0000269 PubMed:12551933, ECO:0000269 PubMed:19137541}. Cytoplasm {ECO:0000269 PubMed:12551933, ECO:0000269 PubMed:17689225, ECO:0000269 PubMed:19137541, ECO:0000269 PubMed:20068069, ECO:0000269 PubMed:22689054, ECO:0000269 PubMed:24073260}. Mitochondrion membrane; Peripheral membrane protein; Cytoplasmic side {ECO:0000269 PubMed:17689225}. Cytoplasm, cytosol {ECO:0000269 PubMed:17451556, ECO:0000269 PubMed:22689054, ECO:0000269 PubMed:24073260}. Microsome {ECO:0000269 PubMed:22689054}. Endoplasmic reticulum {ECO:0000269 PubMed:16113678, ECO:0000269 PubMed:22689054}. Mitochondrion {ECO:0000269 PubMed:16113678, ECO:0000269 PubMed:22689054}. Mitochondrion membrane {ECO:0000269 PubMed:16113678, ECO:0000269 PubMed:17689225}. Cytoplasm, perinuclear region {ECO:0000250 UniProtKB:P05371}. Cytoplasmic vesicle, secretory vesicle, chromaffin granule {ECO:0000250}. Note=Secreted isoforms can retrotranslocate from the secretory compartments to the cytosol upon cellular stress (PubMed:17451556). Detected in perinuclear foci that may be aggresomes containing misfolded, ubiquitinated proteins (PubMed:20068069). Detected at the mitochondrion membrane upon induction of apoptosis (PubMed:17689225). Under ER stress, a immaturely glycosylated pre-secreted form retrotranslocates from the endoplasmic reticulum (ER)-Golgi network to the cytoplasm to localize in the mitochondria through HSPA5 interaction (PubMed:22689054). ER stress reduces secretion (PubMed:22689054). Under the stress, minor amounts of non-secreted forms accumulate in cytoplasm (PubMed:24073260, PubMed:22689054, PubMed:17451556). Non-secreted forms emerge mainly from failed translocation, alternative splicing or non-canonical initiation start codon (PubMed:24073260, PubMed:12551933). {ECO:0000269 PubMed:12551933, ECO:0000269 PubMed:17451556, ECO:0000269 PubMed:17689225, ECO:0000269 PubMed:20068069, ECO:0000269 PubMed:22689054, ECO:0000269 PubMed:24073260}.</p> |

**Supplemental Table 1 Page 71. All proteins quantitated in study**

| Protein Name                                    | Uniprot | Gene  | Subcellular localization                                                                                                                                                                                                                                                                                                                                                                                                                                                                                                                                                                                                                                                                                                                                                                                                                                                                                                   |
|-------------------------------------------------|---------|-------|----------------------------------------------------------------------------------------------------------------------------------------------------------------------------------------------------------------------------------------------------------------------------------------------------------------------------------------------------------------------------------------------------------------------------------------------------------------------------------------------------------------------------------------------------------------------------------------------------------------------------------------------------------------------------------------------------------------------------------------------------------------------------------------------------------------------------------------------------------------------------------------------------------------------------|
| Dystroglycan                                    | Q14118  | DAG1  | Alpha-dystroglycan: Secreted, extracellular space.; Beta-dystroglycan: Cell membrane; Single-pass type I membrane protein. Cytoplasm, cytoskeleton. Nucleus, nucleoplasm. Cell membrane, sarcolemma {ECO:0000250}. Cell junction, synapse, postsynaptic cell membrane {ECO:0000250}. Note=The monomeric form translocates to the nucleus via the action of importins and depends on RAN. Nuclear transport is inhibited by Tyr-892 phosphorylation. In skeletal muscle, this phosphorylated form locates to a vesicular internal membrane compartment. In muscle cells, sarcolemma localization requires the presence of ANK2, while localization to costameres requires the presence of ANK3. Localizes to neuromuscular junctions (NMJs) in the presence of ANK2 (By similarity). In peripheral nerves, localizes to the Schwann cell membrane. Colocalizes with ERM proteins in Schwann-cell microvilli. {ECO:0000250}. |
| 40S ribosomal protein S7                        | P62081  | RPS7  | Cytoplasm, cytoskeleton, microtubule organizing center, centrosome {ECO:0000269 PubMed:14654843, ECO:0000269 PubMed:20873783}. Note=Colocalizes with NEK6 in the centrosome. {ECO:0000269 PubMed:20873783}.                                                                                                                                                                                                                                                                                                                                                                                                                                                                                                                                                                                                                                                                                                                |
| Mannose-P-dolichol utilization defect 1 protein | O75352  | MPDU1 | Membrane {ECO:0000305}; Multi-pass membrane protein {ECO:0000305}.                                                                                                                                                                                                                                                                                                                                                                                                                                                                                                                                                                                                                                                                                                                                                                                                                                                         |
| Myeloperoxidase                                 | P05164  | MPO   | Lysosome.                                                                                                                                                                                                                                                                                                                                                                                                                                                                                                                                                                                                                                                                                                                                                                                                                                                                                                                  |



**Supplemental Table 3 Page 1. Differentially expressed proteins using the broader criteria of log fold change > 1.5-fold (fold change > 2.83).**

| Gene   | Uniprot | log2 fc | p-value     | Known dysregulation in IIM |
|--------|---------|---------|-------------|----------------------------|
| A8MU46 | SMTNL1  | -4.0    | 0.110332757 | No                         |
| B0YJ81 | HACD1   | -2.4    | 0.529825676 | No                         |
| O00159 | MYO1C   | 1.6     | 0.022892984 | No                         |
| O00186 | STXBP3  | -3.0    | 0.199438589 | No                         |
| O00303 | EIF3F   | -3.2    | 0.049268968 | No                         |
| O00410 | IPO5    | -2.3    | 0.103927534 | No                         |
| O00429 | DNM1L   | -3.9    | 0.119716348 | Yes                        |
| O00499 | BIN1    | -3.1    | 0.014403684 | No                         |
| O00505 | KPNA3   | -2.3    | 0.237298829 | No                         |
| O00629 | KPNA4   | -2.7    | 0.004549505 | Yes                        |
| O00757 | FBP2    | -5.1    | 0.076525315 | No                         |
| O14548 | COX7A2L | 2.5     | 0.047600486 | No                         |
| O14558 | HSPB6   | -2.5    | 0.001114992 | No                         |
| O14732 | IMPA2   | -3.1    | 0.110393885 | No                         |
| O14773 | TPP1    | 2.7     | 0.006169777 | No                         |
| O15061 | SYNM    | -2.5    | 0.169150061 | No                         |
| O43615 | TIMM44  | 1.7     | 0.030451795 | No                         |
| O43674 | NDUFB5  | -2.5    | 0.55814032  | No                         |
| O43676 | NDUFB3  | -3.2    | 0.646221363 | No                         |
| O43681 | ASNA1   | -2.8    | 0.124546765 | No                         |
| O43707 | ACTN4   | 2.4     | 0.008497462 | No                         |
| O43819 | SCO2    | -2.4    | 0.368418507 | No                         |
| O60662 | KLHL41  | -2.0    | 0.046842744 | No                         |
| O60664 | PLIN3   | -4.2    | 0.137325454 | No                         |
| O60763 | USO1    | -2.2    | 0.103090829 | No                         |
| O75112 | LDB3    | -4.1    | 2.37334E-05 | Yes                        |
| O75128 | COBL    | -1.6    | 0.385041151 | No                         |
| O75155 | CAND2   | -2.6    | 0.10645561  | No                         |
| O94826 | TOMM70  | -2.0    | 0.078405329 | No                         |
| O95139 | NDUFB6  | -2.1    | 0.051415212 | No                         |
| O95210 | STBD1   | -3.6    | 0.059585958 | No                         |
| O95292 | VAPB    | -3.0    | 0.032663565 | No                         |
| O95479 | H6PD    | -2.3    | 0.167493417 | No                         |
| O95563 | MPC2    | 2.2     | 0.003215939 | No                         |
| O95674 | CDS2    | -1.7    | 0.60471683  | No                         |
| P00918 | CA2     | 1.7     | 0.07902955  | No                         |
| P01024 | C3      | 2.3     | 0.003413826 | Yes                        |
| P01876 | IGHA1   | 2.2     | 0.030254584 | No                         |
| P01892 | HLA-A   | 2.9     | 0.000666857 | Yes                        |
| P01893 | HLA-H   | 4.0     | 4.63886E-05 | Yes                        |
| P01903 | HLA-DRA | 6.3     | 0.007047072 | Yes                        |
| P02452 | COL1A1  | 3.9     | 0.065427372 | No                         |

**Supplemental Table 3 Page 2. Differentially expressed proteins using the broader criteria of log fold change > 1.5-fold (fold change > 2.83).**

| Gene   | Uniprot  | log2 fc | p-value     | Known dysregulation in IIM |
|--------|----------|---------|-------------|----------------------------|
| P02461 | COL3A1   | 2.9     | 0.047099047 | No                         |
| P02462 | COL4A1   | 2.8     | 0.032135937 | No                         |
| P02545 | LMNA     | -4.9    | 0.057328831 | Yes                        |
| P02585 | TNNC2    | -6.6    | 0.05288353  | No                         |
| P02647 | APOA1    | 2.4     | 0.003212939 | Yes                        |
| P02675 | FGB      | 1.8     | 0.055195803 | Yes                        |
| P02679 | FGG      | 3.4     | 0.024774286 | Yes                        |
| P02724 | GYPA     | -3.8    | 0.217449886 | No                         |
| P03891 | MT-ND2   | -2.4    | 0.271892303 | No                         |
| P04083 | ANXA1    | 1.9     | 0.017857248 | Yes                        |
| P04217 | A1BG     | 3.4     | 0.033000545 | No                         |
| P04229 | HLA-DRB1 | 4.4     | 0.002128458 | Yes                        |
| P04632 | CAPNS1   | -3.8    | 0.021361808 | No                         |
| P04899 | GNAI2    | 1.7     | 0.020138201 | No                         |
| P05023 | ATP1A1   | 2.2     | 0.039251248 | No                         |
| P05386 | RPLP1    | -1.5    | 0.923403269 | No                         |
| P05387 | RPLP2    | -4.2    | 0.571664666 | No                         |
| P07195 | LDHB     | 1.5     | 0.009917201 | No                         |
| P07437 | TUBB     | -1.7    | 0.00374033  | No                         |
| P07585 | DCN      | 1.5     | 0.064394588 | No                         |
| P07900 | HSP90AA1 | -1.7    | 0.042759368 | No                         |
| P08123 | COL1A2   | 2.8     | 0.020907725 | No                         |
| P08237 | PFKM     | -1.5    | 0.035190235 | No                         |
| P08670 | VIM      | -4.3    | 0.063017473 | No                         |
| P09110 | ACAA1    | 1.9     | 0.014039676 | No                         |
| P09429 | HMGB1    | -3.1    | 0.682724408 | Yes                        |
| P0DMV8 | HSPA1A   | -1.7    | 0.006011475 | Yes                        |
| P0DOX7 | IGKC     | 1.8     | 0.003926573 | No                         |
| P11055 | MYH3     | 2.3     | 0.1005255   | No                         |
| P11142 | HSPA8    | -1.9    | 2.32817E-05 | No                         |
| P11233 | RALA     | -3.6    | 0.033299778 | No                         |
| P12109 | COL6A1   | 2.3     | 0.029671758 | Yes                        |
| P12110 | COL6A2   | 1.9     | 0.046041013 | No                         |
| P12694 | BCKDHA   | 2.2     | 0.007839783 | No                         |
| P13639 | EEF2     | -2.0    | 0.309572037 | No                         |
| P13807 | GYS1     | -3.8    | 0.09616956  | No                         |
| P13861 | PRKAR2A  | -5.2    | 0.07257047  | No                         |
| P14314 | PRKCSH   | -2.2    | 0.284074797 | No                         |
| P14649 | MYL6B    | 2.0     | 0.01768471  | No                         |
| P15088 | CPA3     | 2.2     | 0.009761953 | No                         |
| P15311 | EZR      | 1.7     | 0.022947391 | No                         |

**Supplemental Table 3 Page 3. Differentially expressed proteins using the broader criteria of log fold change > 1.5-fold (fold change > 2.83).**

| Gene   | Uniprot  | log2 fc | p-value     | Known dysregulation in IIM |
|--------|----------|---------|-------------|----------------------------|
| P15954 | COX7C    | -2.2    | 1.38599E-05 | No                         |
| P16403 | HIST1H1C | -1.9    | 0.343437748 | No                         |
| P16989 | YBX3     | -4.0    | 0.137399545 | No                         |
| P17661 | DES      | -2.6    | 0.013997002 | No                         |
| P18206 | VCL      | -2.2    | 0.281973684 | No                         |
| P19105 | MYL12A   | 5.5     | 0.046173046 | No                         |
| P19338 | NCL      | -1.8    | 0.667579647 | No                         |
| P23946 | CMA1     | 2.5     | 0.015226731 | No                         |
| P26038 | MSN      | 1.5     | 0.059437366 | No                         |
| P30153 | PPP2R1A  | -2.6    | 0.014759111 | No                         |
| P30508 | HLA-C    | 5.3     | 0.00236009  | Yes                        |
| P34897 | SHMT2    | 3.7     | 0.034570236 | No                         |
| P35573 | AGL      | -2.6    | 0.163155831 | No                         |
| P35579 | MYH9     | 2.2     | 0.029344361 | No                         |
| P35613 | BSG      | -1.7    | 0.003381245 | No                         |
| P36269 | GGT5     | 2.2     | 0.008435173 | No                         |
| P36871 | PGM1     | -1.7    | 9.1305E-06  | No                         |
| P40123 | CAP2     | -3.3    | 0.051069721 | No                         |
| P43897 | TSFM     | -2.3    | 0.348781219 | No                         |
| P47897 | QARS     | -1.5    | 0.068227846 | No                         |
| P48788 | TNNI2    | -5.7    | 0.073071929 | No                         |
| P50336 | PPOX     | -1.5    | 0.152333791 | No                         |
| P50579 | METAP2   | -2.8    | 0.10586647  | No                         |
| P51149 | RAB7A    | -4.4    | 0.170797665 | Yes                        |
| P51553 | IDH3G    | -2.9    | 0.29045966  | No                         |
| P54619 | PRKAG1   | -4.2    | 0.047841139 | No                         |
| P54652 | HSPA2    | -4.4    | 0.02877411  | No                         |
| P55060 | CSE1L    | -2.1    | 0.102248102 | No                         |
| P55290 | CDH13    | -2.8    | 0.082793228 | No                         |
| P60842 | EIF4A1   | -3.6    | 0.037211148 | No                         |
| P61019 | RAB2A    | -4.2    | 0.209408207 | No                         |
| P61088 | UBE2N    | -3.7    | 0.134615443 | No                         |
| P61769 | B2M      | 5.9     | 0.00074605  | Yes                        |
| P61978 | HNRNPK   | -3.3    | 0.052426279 | No                         |
| P62070 | RRAS2    | -3.0    | 0.110872842 | No                         |
| P62942 | FKBP1A   | -4.6    | 0.200638706 | No                         |
| P68032 | ACTC1    | 1.8     | 0.045434215 | No                         |
| P68366 | TUBA4A   | -1.9    | 0.001271591 | No                         |
| P68371 | TUBB4B   | -3.5    | 0.007894288 | No                         |
| P78371 | CCT2     | -3.5    | 4.89118E-06 | No                         |
| P82673 | MRPS35   | -3.0    | 0.035970959 | No                         |
| P82933 | MRPS9    | -1.8    | 0.443850291 | No                         |

**Supplemental Table 3 Page 4. Differentially expressed proteins using the broader criteria of log fold change > 1.5-fold (fold change > 2.83).**

| Gene   | Uniprot | log2 fc | p-value     | Known dysregulation in IIM |
|--------|---------|---------|-------------|----------------------------|
| Q00688 | FKBP3   | -3.5    | 0.023600796 | No                         |
| Q02161 | RHD     | 2.1     | 0.025319125 | No                         |
| Q02221 | COX6A2  | -4.5    | 0.334599498 | No                         |
| Q02641 | CACNB1  | -4.3    | 0.064832485 | No                         |
| Q02750 | MAP2K1  | -2.4    | 0.070836237 | No                         |
| Q03252 | LMNB2   | -2.5    | 0.216188134 | No                         |
| Q03518 | TAP1    | 5.2     | 0.000880626 | Yes                        |
| Q04826 | HLA-B   | 4.1     | 0.000123047 | Yes                        |
| Q06432 | CACNG1  | -3.2    | 0.307107644 | No                         |
| Q08043 | ACTN3   | -2.2    | 0.235839727 | Yes                        |
| Q13162 | PRDX4   | -2.5    | 0.027086199 | No                         |
| Q13405 | MRPL49  | 2.1     | 0.003199723 | No                         |
| Q13424 | SNTA1   | -4.2    | 0.079134944 | No                         |
| Q13425 | SNTB2   | -1.7    | 0.063679353 | No                         |
| P21810 | BGN     | 3.6     | 0.035730819 | Yes                        |
| P21964 | COMT    | -1.8    | 0.187479561 | No                         |
| P22061 | PCMT1   | -4.7    | 0.082583282 | No                         |
| P22830 | FECH    | -2.3    | 0.014739743 | No                         |
| P23109 | AMPD1   | -4.7    | 0.125239441 | Yes                        |
| P23297 | S100A1  | 3.7     | 0.000184071 | No                         |
| P23327 | HRC     | -1.8    | 0.226632159 | No                         |
| P23368 | ME2     | 1.6     | 0.013008018 | No                         |
| Q13508 | ART3    | -3.3    | 0.029593722 | No                         |
| Q13554 | CAMK2B  | -3.7    | 0.187213621 | No                         |
| Q13557 | CAMK2D  | -2.8    | 0.659340342 | No                         |
| Q13586 | STIM1   | -1.5    | 0.170970366 | No                         |
| Q13698 | CACNA1S | -1.5    | 0.299346271 | No                         |
| Q14165 | MLEC    | -2.7    | 0.605025057 | No                         |
| Q14324 | MYBPC2  | -2.1    | 0.113212678 | No                         |
| Q14974 | KPNB1   | -2.7    | 6.06202E-06 | No                         |
| Q15006 | EMC2    | -2.0    | 0.554314968 | No                         |
| Q15149 | PLEC    | -2.0    | 0.006290887 | No                         |
| Q15365 | PCBP1   | -4.7    | 0.126117826 | No                         |
| Q16851 | UGP2    | -2.9    | 0.127953396 | No                         |
| Q2TBA0 | KLHL40  | -3.1    | 0.188191946 | No                         |
| Q53GG5 | PDLIM3  | -5.6    | 0.009061839 | No                         |
| Q5SV97 | PERM1   | -3.3    | 0.176454789 | No                         |
| Q6IAN0 | DHRS7B  | -1.9    | 0.213416979 | No                         |
| Q6PCB7 | SLC27A1 | -2.1    | 0.211144198 | No                         |
| Q6QEF8 | CORO6   | -2.1    | 0.060782306 | No                         |
| Q7Z434 | MAVS    | -3.0    | 0.283769218 | Yes                        |
| Q86YB7 | ECHDC2  | -3.1    | 0.048635827 | No                         |

**Supplemental Table 3 Page 5. Differentially expressed proteins using the broader criteria of log fold change > 1.5-fold (fold change > 2.83).**

| Gene    | Uniprot | log2 fc | p-value     | Known dysregulation in IIM |
|---------|---------|---------|-------------|----------------------------|
| Q8IWW8  | ADHFE1  | -2.5    | 0.667469667 | No                         |
| Q8IWX7  | UNC45B  | -3.6    | 0.002199043 | Yes                        |
| Q8IXM3  | MRPL41  | 1.5     | 0.117231499 | No                         |
| Q8N142  | ADSSL1  | -1.5    | 5.81733E-05 | No                         |
| Q8N1G4  | LRRC47  | -2.5    | 0.000175629 | No                         |
| Q8N465  | D2HGDH  | -2.2    | 0.340975853 | No                         |
| Q8N4Q0  | ZADH2   | -1.5    | 0.758921091 | No                         |
| Q8N5K1  | CISD2   | 5.1     | 0.011510716 | No                         |
| Q8NB12  | SMYD1   | -3.1    | 0.20804061  | No                         |
| Q8NE86  | MCU     | 1.7     | 0.003239405 | No                         |
| Q8TB37  | NUBPL   | -2.1    | 0.841369012 | No                         |
| Q8TD30  | GPT2    | -2.0    | 0.288771877 | No                         |
| Q8TDC0  | MYOZ3   | -4.5    | 0.30404495  | No                         |
| Q8WUM4  | PDCD6IP | -2.0    | 0.157142915 | No                         |
| Q8WWC4  | MAIP1   | 4.1     | 0.001503921 | No                         |
| Q8WWWV3 | RTN4IP1 | -1.5    | 0.854047671 | No                         |
| Q92499  | DDX1    | -2.0    | 0.005716228 | No                         |
| Q96A26  | FAM162A | -3.5    | 0.148420518 | No                         |
| Q96BQ5  | CCDC127 | -3.1    | 0.379752133 | No                         |
| Q96EY1  | DNAJA3  | -2.3    | 0.089756144 | No                         |
| Q96HC4  | PDLIM5  | -4.0    | 0.168123525 | No                         |
| Q96Q06  | PLIN4   | -5.2    | 0.01580523  | No                         |
| Q9BR39  | JPH2    | -4.2    | 0.17766303  | No                         |
| Q9BRX8  | PRXL2A  | 1.7     | 0.024702621 | No                         |
| Q9BT78  | COPS4   | -3.0    | 0.239503881 | No                         |
| Q9BWM7  | SFXN3   | 3.5     | 0.029193685 | No                         |
| Q9BX68  | HINT2   | -3.3    | 0.956139796 | No                         |
| Q9BXI3  | NT5C1A  | -2.4    | 0.902769609 | Yes                        |
| Q9B XK5 | BCL2L13 | -3.7    | 0.107263944 | No                         |
| Q9BZE1  | MRPL37  | -2.3    | 0.335748258 | No                         |
| Q9H1R3  | MYLK2   | -4.1    | 0.110999691 | No                         |
| Q9H3N1  | TMX1    | -2.3    | 0.100131082 | No                         |
| Q9H987  | SYNPO2L | -2.1    | 0.089540587 | No                         |
| Q9HA77  | CARS2   | -1.8    | 0.004268332 | No                         |
| Q9HBI1  | PARVB   | -3.3    | 0.00061543  | No                         |
| Q9HCU5  | PREB    | -2.7    | 0.274492313 | No                         |
| Q9HDC5  | JPH1    | -4.4    | 0.063868612 | No                         |
| Q9NP72  | RAB18   | -2.9    | 0.105847238 | No                         |
| Q9NP98  | MYOZ1   | -6.6    | 0.062037062 | No                         |
| Q9NPC6  | MYOZ2   | -3.7    | 0.036817196 | No                         |
| Q9NWU1  | OXSM    | -2.0    | 0.032848914 | No                         |

**Supplemental Table 3 Page 6. Differentially expressed proteins using the broader criteria of log fold change > 1.5-fold (fold change > 2.83).**

| Gene   | Uniprot | log2 fc | p-value     | Known dysregulation in IIM |
|--------|---------|---------|-------------|----------------------------|
| Q9Y6E2 | BZW2    | -3.8    | 0.032837967 | No                         |
| Q9Y6H1 | CHCHD2  | -4.4    | 0.233974482 | No                         |
| Q9Y6N5 | SQOR    | 1.8     | 0.024479227 | No                         |
| Q9NZN4 | EHD2    | -1.9    | 0.134662671 | No                         |
| Q9NZQ9 | TMOD4   | -5.0    | 0.041083885 | No                         |
| Q9NZU5 | LMCD1   | -4.8    | 0.112576741 | No                         |
| Q9P0J1 | PDP1    | -1.6    | 0.103082553 | No                         |
| Q9P0L0 | VAPA    | -3.8    | 0.098939163 | No                         |
| Q9UBF9 | MYOT    | -4.7    | 0.019899696 | No                         |
| Q9UBW8 | COPS7A  | -4.3    | 0.001635387 | No                         |
| Q9UL25 | RAB21   | -4.8    | 0.056158292 | No                         |
| Q9UMS6 | SYNPO2  | -3.0    | 0.215698101 | No                         |
| Q9UN36 | NDRG2   | -3.7    | 0.198342781 | No                         |
| Q9UNS2 | COPS3   | -2.4    | 0.095398394 | No                         |
| Q9UQM7 | CAMK2A  | -1.6    | 0.443784634 | No                         |
| Q9Y235 | APOBEC2 | -2.5    | 0.066459185 | No                         |
| Q9Y2Q3 | GSTK1   | 1.6     | 0.00877361  | No                         |
| Q9Y5U8 | MPC1    | 1.5     | 0.017911838 | Yes                        |
| Q9Y613 | FHOD1   | -2.6    | 0.042156051 | No                         |
| Q9Y6B6 | SAR1B   | -3.3    | 0.04539695  | No                         |

**Supplemental Table 4 Page 1. Significantly underrepresented cellular pathways in IIM**

| Pathway name                                                                        | <i>p</i> value | FDR      | Submitted entities found                                                                                                                  |
|-------------------------------------------------------------------------------------|----------------|----------|-------------------------------------------------------------------------------------------------------------------------------------------|
| <b>Cellular response to stress</b>                                                  |                |          |                                                                                                                                           |
| HSF1-dependent transactivation                                                      | 2.84E-12       | 2.28E-09 | CAMK2B; HSPA8; CAMK2D; HSP90AA1; CAMK2A; HSPA2; HSPA1A                                                                                    |
| Attenuation phase                                                                   | 1.35E-09       | 5.42E-07 | HSPA8; HSP90AA1; HSPA2; HSPA1A                                                                                                            |
| Cellular response to heat stress                                                    | 5.49E-08       | 1.10E-05 | CAMK2B; HSPA8; CAMK2D; HSP90AA1; CAMK2A; HSPA2; HSPA1A                                                                                    |
| HSP90 chaperone cycle for steroid hormone receptors (SHR) in the presence of ligand | 7.20E-08       | 1.15E-05 | HSPA8; HSP90AA1; TUBB; HSPA2; TUBB4B; TUBA4A; HSPA1A; CAP2                                                                                |
| Regulation of HSF1-mediated heat shock response                                     | 2.80E-05       | 0.0014   | HSPA8; HSPA2; HSPA1A                                                                                                                      |
| HSF1 activation                                                                     | 3.06E-05       | 0.0014   | HSP90AA1; HSPA1A                                                                                                                          |
| Cellular responses to stress                                                        | 9.06E-05       | 0.0036   | CAMK2B; HSPA8; CAMK2D; HSP90AA1; TUBB; RPLP1; CAMK2A; HSPA2; TUBB4B; COX7C; TUBA4A; VAPA; SCO2; LMNA; RPLP2; PREB; HSPA1A; CAP2; HIST1H1C |
| Cellular responses to stimuli                                                       | 1.23E-04       | 0.0042   | CAMK2B; HSPA8; CAMK2D; HSP90AA1; TUBB; RPLP1; CAMK2A; HSPA2; TUBB4B; COX7C; TUBA4A; VAPA; SCO2; LMNA; RPLP2; PREB; HSPA1A; CAP2; HIST1H1C |
| <b>Autophagy</b>                                                                    |                |          |                                                                                                                                           |
| Selective autophagy                                                                 | 5.09E-08       | 1.10E-05 | TOMM70; HSPA8; HSP90AA1; TUBB; PLIN4; UBE2N; PRKAG1; PLIN3; VIM; TUBB4B; TUBA4A                                                           |
| Aggrephagy                                                                          | 4.35E-06       | 4.35E-04 | HSP90AA1; TUBB; UBE2N; VIM; TUBB4B; TUBA4A                                                                                                |
| Macroautophagy                                                                      | 7.78E-06       | 5.45E-04 | TOMM70; HSPA8; HSP90AA1; TUBB; PLIN4; UBE2N; PRKAG1; PLIN3; VIM; TUBB4B; TUBA4A                                                           |
| Autophagy                                                                           | 1.97E-05       | 0.0012   | TOMM70; HSPA8; HSP90AA1; TUBB; PLIN4; UBE2N; PRKAG1; PLIN3; VIM; TUBB4B; TUBA4A                                                           |
| Chaperone Mediated Autophagy                                                        | 2.96E-04       | 0.0080   | HSPA8; HSP90AA1; PLIN3; VIM                                                                                                               |
| <b>Programmed cell death</b>                                                        |                |          |                                                                                                                                           |
| Apoptotic execution phase                                                           | 9.28E-07       | 1.23E-04 | LMNA; VIM; HMGB1; DNM1L; KPNB1; PLEC; HIST1H1C                                                                                            |
| Apoptosis induced DNA fragmentation                                                 | 3.35E-05       | 0.0014   | HMGB1; KPNB1; HIST1H1C                                                                                                                    |
| Programmed Cell Death                                                               | 0.0016         | 0.021    | HSP90AA1; PDCD6IP; LMNA; VIM; HMGB1; DNM1L; KPNB1; PLEC; HIST1H1C                                                                         |
| Apoptosis                                                                           | 0.0049         | 0.044    | LMNA; VIM; HMGB1; DNM1L; KPNB1; PLEC; HIST1H1C                                                                                            |

**Supplemental Table 4 Page 2. Significantly underrepresented cellular pathways in IIM**

| Pathway name                                                                                                        | <i>p</i> value | FDR      | Submitted entities found                                                                                                                  |
|---------------------------------------------------------------------------------------------------------------------|----------------|----------|-------------------------------------------------------------------------------------------------------------------------------------------|
| <b>Muscle contraction</b>                                                                                           |                |          |                                                                                                                                           |
| Striated Muscle Contraction                                                                                         | 1.52E-06       | 1.74E-04 | MYBPC2; DES; ACTN3; TMOD4; TNNC2; TNNI2; VIM                                                                                              |
| Muscle contraction                                                                                                  | 8.25E-06       | 5.45E-04 | CAMK2B; CAMK2D; MYBPC2; ACTN3; TMOD4; CAMK2A; TNNC2; CACNB1; DES; STIM1; TNNI2; VIM; VCL                                                  |
| Phase 0 - rapid depolarisation                                                                                      | 0.0013         | 0.018    | CAMK2B; CACNB1; CAMK2D; CAMK2A                                                                                                            |
| <b>Synaptic communication</b>                                                                                       |                |          |                                                                                                                                           |
| Assembly and cell surface presentation of NMDA receptors                                                            | 5.69E-06       | 5.07E-04 | CAMK2B; CAMK2D; TUBB; CAMK2A; TUBB4B; TUBA4A                                                                                              |
| Post NMDA receptor activation events                                                                                | 7.85E-06       | 5.45E-04 | CAMK2B; CAMK2D; TUBB; PRKAR2A; CAMK2A; PRKAG1; TUBB4B; TUBA4A                                                                             |
| Activation of NMDA receptors and postsynaptic events                                                                | 2.80E-05       | 0.0014   | CAMK2B; CAMK2D; TUBB; PRKAR2A; CAMK2A; PRKAG1; TUBB4B; TUBA4A                                                                             |
| Activation of AMPK downstream of NMDARs                                                                             | 1.12E-04       | 0.0041   | TUBB; PRKAG1; TUBB4B; TUBA4A                                                                                                              |
| <b>Membrane trafficking</b>                                                                                         |                |          |                                                                                                                                           |
| Translocation of SLC2A4 (GLUT4) to the plasma membrane                                                              | 1.34E-04       | 0.0044   | RALA; STXBP3; TUBB; PRKAG1; TUBB4B; TUBA4A                                                                                                |
| COPI-independent Golgi-to-ER retrograde traffic                                                                     | 2.42E-04       | 0.0075   | TUBB; RAB18; TUBB4B; TUBA4A; CAP2                                                                                                         |
| Microtubule-dependent trafficking of connexons from Golgi to the plasma membrane                                    | 2.50E-04       | 0.0075   | TUBB; TUBB4B; TUBA4A                                                                                                                      |
| Transport of connexons to the plasma membrane                                                                       | 2.96E-04       | 0.0080   | TUBB; TUBB4B; TUBA4A                                                                                                                      |
| Membrane Trafficking                                                                                                | 3.16E-04       | 0.0082   | HSPA8; RALA; STXBP3; SAR1B; TUBB; USO1; PRKAG1; COPS7A; TUBB4B; TUBA4A; COPS4; RAB21; COPS3; BIN1; RAB18; PLIN4; PLIN3; PREB; CAP2; RAB7A |
| Anchoring of the basal body to the plasma membrane                                                                  | 0.0024         | 0.027    | HSP90AA1; PPP2R1A; TUBB; TUBB4B; TUBA4A                                                                                                   |
| MHC class II antigen presentation                                                                                   | 0.0044         | 0.040    | SAR1B; TUBB; TUBB4B; TUBA4A; CAP2; RAB7A                                                                                                  |
| <b>Citric acid cycle and respiratory electron transport</b>                                                         |                |          |                                                                                                                                           |
| The citric acid (TCA) cycle and respiratory electron transport                                                      | 1.13E-04       | 0.0041   | PDP1; NDUFB6; NDUFB5; IDH3G; NUBPL; SCO2; ADHFE1; NDUFB3; BSG; D2HGDH; MT-ND2; COX7C                                                      |
| Respiratory electron transport                                                                                      | 0.0012         | 0.017    | NDUFB6; NDUFB5; NUBPL; SCO2; NDUFB3; MT-ND2; COX7C                                                                                        |
| Complex I biogenesis                                                                                                | 0.0013         | 0.019    | NDUFB6; NDUFB5; NUBPL; NDUFB3; MT-ND2                                                                                                     |
| Respiratory electron transport, ATP synthesis by chemiosmotic coupling, and heat production by uncoupling proteins. | 0.0051         | 0.046    | NDUFB6; NDUFB5; NUBPL; SCO2; NDUFB3; MT-ND2; COX7C                                                                                        |

**Supplemental Table 4 Page 3. Significantly underrepresented cellular pathways in IIM**

| Pathway name                                                                                | <i>p</i> value | FDR    | Submitted entities found                   |
|---------------------------------------------------------------------------------------------|----------------|--------|--------------------------------------------|
| <b>Cell cycle, mitotic</b>                                                                  |                |        |                                            |
| Nuclear Envelope (NE) Reassembly                                                            | 3.13E-05       | 0.0014 | PPP2R1A; TUBB; LMNA; TUBB4B; TUBA4A; KPNB1 |
| Recruitment of NuMA to mitotic centrosomes                                                  | 3.94E-04       | 0.010  | HSP90AA1; PPP2R1A; TUBB; TUBB4B; TUBA4A    |
| Loss of proteins required for interphase microtubule organization from the centrosome       | 4.54E-04       | 0.011  | HSP90AA1; PPP2R1A; TUBB; TUBB4B; TUBA4A    |
| Loss of Nlp from mitotic centrosomes                                                        | 4.54E-04       | 0.011  | HSP90AA1; PPP2R1A; TUBB; TUBB4B; TUBA4A    |
| Initiation of Nuclear Envelope (NE) Reformation                                             | 5.38E-04       | 0.012  | PPP2R1A; LMNA; KPNB1                       |
| AURKA Activation by TPX2                                                                    | 5.63E-04       | 0.012  | HSP90AA1; PPP2R1A; TUBB; TUBB4B; TUBA4A    |
| Recruitment of mitotic centrosome proteins and complexes                                    | 8.96E-04       | 0.015  | HSP90AA1; PPP2R1A; TUBB; TUBB4B; TUBA4A    |
| Centrosome maturation                                                                       | 0.00101471     | 0.015  | HSP90AA1; PPP2R1A; TUBB; TUBB4B; TUBA4A    |
| Regulation of PLK1 Activity at G2/M Transition                                              | 0.0017         | 0.022  | HSP90AA1; PPP2R1A; TUBB; TUBB4B; TUBA4A    |
| Sealing of the nuclear envelope (NE) by ESCRT-III                                           | 0.0021         | 0.025  | TUBB; TUBB4B; TUBA4A                       |
| The role of GTSE1 in G2/M progression after G2 checkpoint                                   | 0.0057         | 0.046  | HSP90AA1; TUBB; TUBB4B; TUBA4A             |
| <b>Oncogenic MAPK signaling</b>                                                             |                |        |                                            |
| RAF activation                                                                              | 2.64E-04       | 0.0077 | CAMK2B; MAP2K1; CAMK2D; PPP2R1A; CAMK2A    |
| Signaling by BRAF and RAF1 fusions                                                          | 5.25E-04       | 0.012  | CAMK2B; MAP2K1; CAMK2D; CAMK2A; LMNA; VCL  |
| Signaling by RAF1 mutants                                                                   | 5.90E-04       | 0.012  | CAMK2B; MAP2K1; CAMK2D; CAMK2A; VCL        |
| Signaling downstream of RAS mutants                                                         | 9.09E-04       | 0.015  | CAMK2B; MAP2K1; CAMK2D; CAMK2A; VCL        |
| Signaling by moderate kinase activity BRAF mutants                                          | 9.09E-04       | 0.015  | CAMK2B; MAP2K1; CAMK2D; CAMK2A; VCL        |
| Paradoxical activation of RAF signaling by kinase inactive BRAF                             | 9.09E-04       | 0.015  | CAMK2B; MAP2K1; CAMK2D; CAMK2A; VCL        |
| Signaling by RAS mutants                                                                    | 9.09E-04       | 0.015  | CAMK2B; MAP2K1; CAMK2D; CAMK2A; VCL        |
| Oncogenic MAPK signaling                                                                    | 0.0018         | 0.022  | CAMK2B; MAP2K1; CAMK2D; CAMK2A; LMNA; VCL  |
| <b>Diseases of programmed cell death</b>                                                    |                |        |                                            |
| Neurodegenerative Diseases                                                                  | 7.95E-04       | 0.014  | PRDX4; CAPNS1; LMNA                        |
| Deregulated CDK5 triggers multiple neurodegenerative pathways in Alzheimer's disease models | 7.95E-04       | 0.014  | PRDX4; CAPNS1; LMNA                        |
| Defective Intrinsic Pathway for Apoptosis                                                   | 0.00112805     | 0.017  | PRDX4; CAPNS1; LMNA                        |

**Supplemental Table 4 Page 4. Significantly underrepresented cellular pathways in IIM**

| Pathway name                                                       | <i>p</i> value | FDR   | Submitted entities found                                                                                                                                                                                                                                                    |
|--------------------------------------------------------------------|----------------|-------|-----------------------------------------------------------------------------------------------------------------------------------------------------------------------------------------------------------------------------------------------------------------------------|
| <b>Protein folding</b>                                             |                |       |                                                                                                                                                                                                                                                                             |
| Prefoldin mediated transfer of substrate to CCT/TriC               | 7.02E-04       | 0.014 | CCT2; TUBB; TUBB4B; TUBA4A                                                                                                                                                                                                                                                  |
| Formation of tubulin folding intermediates by CCT/TriC             | 7.95E-04       | 0.014 | CCT2; TUBB; TUBB4B; TUBA4A                                                                                                                                                                                                                                                  |
| Cooperation of Prefoldin and TriC/CCT in actin and tubulin folding | 0.0017         | 0.022 | CCT2; TUBB; TUBB4B; TUBA4A                                                                                                                                                                                                                                                  |
| Post-chaperonin tubulin folding pathway                            | 0.0049         | 0.044 | TUBB; TUBB4B; TUBA4A                                                                                                                                                                                                                                                        |
| <b>Metabolism of proteins</b>                                      |                |       |                                                                                                                                                                                                                                                                             |
| Translation                                                        | 7.95E-04       | 0.014 | EIF4A1; TSFM; MRPS9; MRPS35; QARS; RPLP1; RPLP2; EIF3F; MRPL37; EEF2; CARS2                                                                                                                                                                                                 |
| Protein methylation                                                | 0.0030         | 0.030 | HSPA8; EEF2; ART3                                                                                                                                                                                                                                                           |
| Metabolism of proteins                                             | 0.0050         | 0.045 | EIF4A1; MRPS35; SAR1B; PRKCSH; RPLP1; USO1; COPS7A; MRPL37; ART3; RAB21; PCMT1; MLEC; RPLP2; LMCD1; CAP2; RAB2A; TOMM70; HSPA8; CCT2; TSFM; TUBB; GPT2; TUBB4B; EEF2; TUBA4A; KLHL41; COPS4; COPS3; MRPS9; MAVS; HNRNPK; QARS; HRC; RAB18; UBE2N; PREB; EIF3F; CARS2; RAB7A |
| Alanine metabolism                                                 | 0.0031         | 0.031 | GPT2                                                                                                                                                                                                                                                                        |
| <b>Calcium-dependent events</b>                                    |                |       |                                                                                                                                                                                                                                                                             |
| CaMK IV-mediated phosphorylation of CREB                           | 7.81E-04       | 0.014 | CAMK2B; CAMK2D; CAMK2A                                                                                                                                                                                                                                                      |
| Calmodulin induced events                                          | 0.0029         | 0.029 | CAMK2B; CAMK2D; PRKAR2A; CAMK2A                                                                                                                                                                                                                                             |
| CaM pathway                                                        | 0.0029         | 0.029 | CAMK2B; CAMK2D; PRKAR2A; CAMK2A                                                                                                                                                                                                                                             |
| Ca-dependent events                                                | 0.0043         | 0.040 | CAMK2B; CAMK2D; PRKAR2A; CAMK2A                                                                                                                                                                                                                                             |
| DAG and IP3 signaling                                              | 0.0061         | 0.049 | CAMK2B; CAMK2D; PRKAR2A; CAMK2A                                                                                                                                                                                                                                             |
| <b>Signaling by Rho GTPases, Miro GTPases and RHOBTB3</b>          |                |       |                                                                                                                                                                                                                                                                             |
| RHOD GTPase cycle                                                  | 0.00115279     | 0.017 | HINT2; VAPB; STBD1; CAP2; RAB7A                                                                                                                                                                                                                                             |
| RHOBTB GTPase Cycle                                                | 0.00154837     | 0.020 | COPS4; CCT2; HSP90AA1; VIM                                                                                                                                                                                                                                                  |
| RHO GTPases activate IQGAPs                                        | 0.00154837     | 0.020 | TUBB; TUBB4B; TUBA4A                                                                                                                                                                                                                                                        |
| RHOBTB1 GTPase cycle                                               | 0.0044         | 0.040 | COPS4; CCT2; VIM                                                                                                                                                                                                                                                            |

**Supplemental Table 4 Page 5. Significantly underrepresented cellular pathways in IIM**

| Pathway name                                                          | <i>p</i> value | FDR    | Submitted entities found                                                                                                                            |
|-----------------------------------------------------------------------|----------------|--------|-----------------------------------------------------------------------------------------------------------------------------------------------------|
| Vesicle-mediated transport                                            |                |        |                                                                                                                                                     |
| ER to Golgi Anterograde Transport                                     | 0.0019         | 0.023  | SAR1B; TUBB; USO1; PREB; TUBB4B; TUBA4A; CAP2                                                                                                       |
| Vesicle-mediated transport                                            | 0.0020         | 0.024  | HSPA8; RALA; HSP90AA1; STXBP3; SAR1B; TUBB; USO1; PRKAG1; COPS7A; TUBB4B; TUBA4A; COPS4; RAB21; COPS3; BIN1; RAB18; PLIN4; PLIN3; PREB; CAP2; RAB7A |
| Gap junction assembly                                                 | 0.0025         | 0.027  | TUBB; TUBB4B; TUBA4A                                                                                                                                |
| COPI-mediated anterograde transport                                   | 0.0036         | 0.036  | TUBB; USO1; TUBB4B; TUBA4A; CAP2                                                                                                                    |
| Gap junction trafficking                                              | 0.0057         | 0.046  | TUBB; TUBB4B; TUBA4A                                                                                                                                |
| Transmission across chemical synapses                                 |                |        |                                                                                                                                                     |
| Transmission across Chemical Synapses                                 | 0.0027         | 0.029  | CAMK2B; CACNB1; HSPA8; CAMK2D; TUBB; PRKAR2A; CAMK2A; PRKAG1; TUBB4B; COMT; TUBA4A                                                                  |
| Neurotransmitter receptors and postsynaptic signal transmission       | 0.0046         | 0.042  | CAMK2B; CAMK2D; TUBB; PRKAR2A; CAMK2A; PRKAG1; TUBB4B; TUBA4A                                                                                       |
| Unblocking of NMDA receptors, glutamate binding and activation        | 0.0061         | 0.049  | CAMK2B; CAMK2D; CAMK2A                                                                                                                              |
| Ras activation upon Ca <sup>2+</sup> influx through NMDA receptor     | 0.0061         | 0.049  | CAMK2B; CAMK2D; CAMK2A                                                                                                                              |
| Negative regulation of NMDA receptor-mediated neuronal transmission   | 0.0061         | 0.049  | CAMK2B; CAMK2D; CAMK2A                                                                                                                              |
| Metabolism of carbohydrates                                           |                |        |                                                                                                                                                     |
| Glycogen metabolism                                                   | 0.0029         | 0.029  | GYS1; UGP2; AGL; PGM1                                                                                                                               |
| Glycogen synthesis                                                    | 0.0055         | 0.046  | GYS1; UGP2; PGM1                                                                                                                                    |
| Other                                                                 |                |        |                                                                                                                                                     |
| Neutrophil degranulation                                              | 3.32E-05       | 0.0014 | HSPA8; CCT2; HSP90AA1; TUBB; AGL; HMGB1; TUBB4B; EEF2; PRDX4; VAPA; STBD1; RAB18; MLEC; PGM1; VCL; KPNA1; HSPA1A; RAB7A                             |
| Lipophagy                                                             | 6.21E-04       | 0.013  | HSPA8; PLIN4; PRKAG1; PLIN3                                                                                                                         |
| DNA Damage Recognition in GG-NER                                      | 0.0023         | 0.025  | COPS4; COPS3; COPS7A                                                                                                                                |
| Factors involved in megakaryocyte development and platelet production | 0.0052         | 0.046  | EHD2; TUBB; PRKAR2A; TUBB4B; TUBA4A; CAP2                                                                                                           |
| ISG15 antiviral mechanism                                             | 0.0057         | 0.046  | EIF4A1; UBE2N; KPNA4; KPNA3; KPNA1                                                                                                                  |
| Influenza Infection                                                   | 0.0059         | 0.047  | HSP90AA1; RPLP1; RPLP2; KPNA4; KPNA3; KPNA1; HSPA1A; IPO5                                                                                           |

**Supplemental Table 5 Page 1. Significantly overrepresented cellular pathways in IIM**

| Pathway name                                                               | <i>p</i> value | FDR      | Submitted entities found                                                                               |
|----------------------------------------------------------------------------|----------------|----------|--------------------------------------------------------------------------------------------------------|
| Adaptive immune system                                                     |                |          |                                                                                                        |
| Translocation of ZAP-70 to Immunological synapse                           | 1.11E-16       | 1.78E-15 | HLA-DRA; HLA-DRB1                                                                                      |
| Antigen Presentation: Folding, assembly and peptide loading of class I MHC | 1.11E-16       | 1.78E-15 | HLA-H; HLA-B; HLA-C; TAP1; HLA-A; B2M                                                                  |
| ER-Phagosome pathway                                                       | 1.11E-16       | 1.78E-15 | FGB; HLA-H; S100A1; FGG; HLA-B; HLA-C; TAP1; HLA-A; B2M                                                |
| Endosomal/Vacuolar pathway                                                 | 1.11E-16       | 1.78E-15 | HLA-H; HLA-B; HLA-C; HLA-A; B2M                                                                        |
| Phosphorylation of CD3 and TCR zeta chains                                 | 1.11E-16       | 1.78E-15 | HLA-DRA; HLA-DRB1                                                                                      |
| Class I MHC mediated antigen processing & presentation                     | 1.11E-16       | 1.78E-15 | FGB; HLA-H; S100A1; FGG; HLA-B; HLA-C; TAP1; HLA-A; B2M                                                |
| Antigen processing-Cross presentation                                      | 1.11E-16       | 1.78E-15 | FGB; HLA-H; S100A1; FGG; HLA-B; HLA-C; TAP1; HLA-A; B2M                                                |
| Immunoregulatory interactions between a Lymphoid and a non-Lymphoid cell   | 1.11E-16       | 1.78E-15 | COL1A1; C3; HLA-H; COL3A1; COL1A2; HLA-B; HLA-C; HLA-A; B2M                                            |
| Adaptive Immune System                                                     | 1.11E-16       | 1.78E-15 | FGB; HLA-H; S100A1; FGG; HLA-B; HLA-C; TAP1; HLA-A; COL1A1; C3; COL3A1; COL1A2; HLA-DRA; B2M; HLA-DRB1 |
| PD-1 signaling                                                             | 1.11E-16       | 1.78E-15 | HLA-DRA; HLA-DRB1                                                                                      |
| Interferon gamma signaling                                                 | 1.11E-16       | 1.78E-15 | HLA-H; HLA-B; HLA-C; HLA-DRA; HLA-A; B2M; HLA-DRB1                                                     |
| Interferon alpha/beta signaling                                            | 1.11E-16       | 1.78E-15 | HLA-H; HLA-B; HLA-C; HLA-A                                                                             |
| Generation of second messenger molecules                                   | 6.22E-15       | 9.95E-14 | HLA-DRA; HLA-DRB1                                                                                      |
| Costimulation by the CD28 family                                           | 6.02E-12       | 9.03E-11 | HLA-DRA; HLA-DRB1                                                                                      |
| Downstream TCR signaling                                                   | 1.12E-10       | 1.57E-09 | HLA-DRA; HLA-DRB1                                                                                      |
| TCR signaling                                                              | 9.82E-10       | 1.38E-08 | HLA-DRA; HLA-DRB1                                                                                      |
| MHC class II antigen presentation                                          | 1.17E-09       | 1.51E-08 | HLA-DRA; HLA-DRB1                                                                                      |
| Nef mediated downregulation of MHC class I complex cell surface expression | 0.0064         | 0.0384   | HLA-A; B2M                                                                                             |
| Cytokine signaling in immune system                                        |                |          |                                                                                                        |
| Interferon Signaling                                                       | 1.11E-16       | 1.78E-15 | HLA-H; HLA-B; HLA-C; HLA-DRA; HLA-A; B2M; HLA-DRB1                                                     |
| Cytokine Signaling in Immune system                                        | 1.11E-16       | 1.78E-15 | HLA-H; ANXA1; COL1A2; CA2; HLA-B; HLA-C; MSN; HLA-DRA; HLA-A; B2M; HLA-DRB1                            |

**Supplemental Table 5 Page 2. Significantly overrepresented cellular pathways in IIM**

| Pathway name                                                        | <i>p</i> value | FDR      | Submitted entities found                                                                                      |
|---------------------------------------------------------------------|----------------|----------|---------------------------------------------------------------------------------------------------------------|
| <b>Infectious Disease</b>                                           |                |          |                                                                                                               |
| SARS-CoV-2 activates/modulates innate and adaptive immune responses | 1.11E-16       | 1.78E-15 | HLA-H; HLA-B; HLA-C; HLA-A; B2M                                                                               |
| SARS-CoV-2-host interactions                                        | 1.11E-16       | 1.78E-15 | HLA-H; HLA-B; HLA-C; HLA-A; B2M                                                                               |
| Disease                                                             | 1.11E-16       | 1.78E-15 | FGB; GGT5; HLA-H; S100A1; FGG; HLA-B; BGN; HLA-C; APOA1; MSN; HLA-A; ATP1A1; DCN; GNAI2; C3; MYO1C; MYH9; B2M |
| Infectious disease                                                  | 1.11E-16       | 1.78E-15 | C3; GGT5; HLA-H; MYO1C; HLA-B; MYH9; HLA-C; HLA-A; ATP1A1; B2M; GNAI2                                         |
| SARS-CoV-2 Infection                                                | 1.11E-16       | 1.78E-15 | HLA-H; HLA-B; HLA-C; HLA-A; B2M                                                                               |
| SARS-CoV Infections                                                 | 1.11E-16       | 1.78E-15 | HLA-H; HLA-B; HLA-C; HLA-A; ATP1A1; B2M                                                                       |
| <b>Extracellular matrix organization</b>                            |                |          |                                                                                                               |
| ECM proteoglycans                                                   | 2.71E-06       | 3.52E-05 | COL1A1; COL3A1; COL1A2; COL4A1; COL6A2; COL6A1; BGN; DCN                                                      |
| Integrin cell surface interactions                                  | 5.01E-06       | 6.01E-05 | COL1A1; FGB; COL3A1; COL1A2; COL4A1; COL6A2; COL6A1; FGG                                                      |
| Collagen chain trimerization                                        | 9.47E-06       | 1.14E-04 | COL1A1; COL3A1; COL1A2; COL4A1; COL6A2; COL6A1                                                                |
| Assembly of collagen fibrils and other multimeric structures        | 9.65E-05       | 0.0011   | COL1A1; COL3A1; COL1A2; COL4A1; COL6A2; COL6A1                                                                |
| Collagen degradation                                                | 1.13E-04       | 0.0012   | COL1A1; COL3A1; COL1A2; COL4A1; COL6A2; COL6A1                                                                |
| Collagen biosynthesis and modifying enzymes                         | 1.90E-04       | 0.0021   | COL1A1; COL3A1; COL1A2; COL4A1; COL6A2; COL6A1                                                                |
| Degradation of the extracellular matrix                             | 2.21E-04       | 0.0022   | COL1A1; COL3A1; COL1A2; CMA1; COL4A1; COL6A2; COL6A1; DCN                                                     |
| Anchoring fibril formation                                          | 6.05E-04       | 0.0061   | COL1A1; COL1A2; COL4A1                                                                                        |
| Extracellular matrix organization                                   | 9.24E-04       | 0.0083   | COL1A1; FGB; COL3A1; COL1A2; CMA1; COL4A1; COL6A2; COL6A1; FGG; BGN; DCN                                      |
| Collagen formation                                                  | 9.77E-04       | 0.0088   | COL1A1; COL3A1; COL1A2; COL4A1; COL6A2; COL6A1                                                                |
| Crosslinking of collagen fibrils                                    | 0.0023         | 0.0185   | COL1A1; COL1A2; COL4A1                                                                                        |
| Syndecan interactions                                               | 0.0039         | 0.0275   | COL1A1; COL3A1; COL1A2                                                                                        |
| Non-integrin membrane-ECM interactions                              | 0.0044         | 0.0311   | COL1A1; COL3A1; COL1A2; COL4A1                                                                                |
| <b>Vesicle-mediated transport</b>                                   |                |          |                                                                                                               |
| Scavenging by Class A Receptors                                     | 2.06E-04       | 0.0021   | COL1A1; COL3A1; COL1A2; COL4A1; APOA1                                                                         |
| Binding and Uptake of Ligands by Scavenger Receptors                | 0.0100         | 0.0498   | COL1A1; COL3A1; COL1A2; COL4A1; APOA1; IGHA1                                                                  |
| <b>Metabolism</b>                                                   |                |          |                                                                                                               |
| Reversible hydration of carbon dioxide                              | 8.68E-04       | 0.0078   | CA2                                                                                                           |
| Rhesus blood group biosynthesis                                     | 8.89E-04       | 0.0080   | RHD                                                                                                           |
| Dermatan sulfate biosynthesis                                       | 0.0088         | 0.0473   | BGN; DCN                                                                                                      |

**Supplemental Table 5 Page 3. Significantly overrepresented cellular pathways in IIM**

| Pathway name                                                   | <i>p</i> value | FDR      | Submitted entities found                                                                                                                          |
|----------------------------------------------------------------|----------------|----------|---------------------------------------------------------------------------------------------------------------------------------------------------|
| Nervous system development                                     |                |          |                                                                                                                                                   |
| NCAM1 interactions                                             | 0.0014         | 0.0110   | COL3A1; COL4A1; COL6A2; COL6A1                                                                                                                    |
| NCAM signaling for neurite out-growth                          | 0.0071         | 0.0429   | COL3A1; COL4A1; COL6A2; COL6A1                                                                                                                    |
| Innate immune system                                           |                |          |                                                                                                                                                   |
| DAPI2 interactions                                             | 0.0027         | 0.0216   | HLA-B; HLA-C; B2M                                                                                                                                 |
| Regulation of TLR by endogenous ligand                         | 0.0071         | 0.0426   | FGB; S100A1; FGG                                                                                                                                  |
| Hemostasis                                                     |                |          |                                                                                                                                                   |
| Platelet Aggregation (Plug Formation)                          | 0.0027         | 0.0216   | COL1A1; FGB; COL1A2; FGG                                                                                                                          |
| GP1b-IX-V activation signalling                                | 0.0076         | 0.0454   | COL1A1; COL1A2                                                                                                                                    |
| Diseases associated with the TLR signaling cascade             |                |          |                                                                                                                                                   |
| MyD88 deficiency (TLR2/4)                                      | 0.0029         | 0.0225   | FGB; S100A1; FGG                                                                                                                                  |
| IRAK4 deficiency (TLR2/4)                                      | 0.0032         | 0.0225   | FGB; S100A1; FGG                                                                                                                                  |
| Diseases associated with glycosaminoglycan metabolism          |                |          |                                                                                                                                                   |
| Defective CHST3 causes SEDCJD                                  | 0.0043         | 0.0304   | BGN; DCN                                                                                                                                          |
| Defective CHST14 causes EDS, musculocontractural type          | 0.0043         | 0.0304   | BGN; DCN                                                                                                                                          |
| Defective CHSY1 causes TPBS                                    | 0.0053         | 0.0320   | BGN; DCN                                                                                                                                          |
| Signal transduction                                            |                |          |                                                                                                                                                   |
| MET activates PTK2 signaling                                   | 0.0051         | 0.0315   | COL1A1; COL3A1; COL1A2                                                                                                                            |
| Signaling by PDGF                                              | 0.0071         | 0.0429   | COL3A1; COL4A1; COL6A2; COL6A1                                                                                                                    |
| Sensory perception                                             |                |          |                                                                                                                                                   |
| Sensory processing of sound by outer hair cells of the cochlea | 0.0052         | 0.0315   | MYO1C; MYH9; MSN; EZR                                                                                                                             |
| Sensory processing of sound by inner hair cells of the cochlea | 0.0095         | 0.0473   | MYO1C; MYH9; MSN; EZR                                                                                                                             |
| Other                                                          |                |          |                                                                                                                                                   |
| Immune System                                                  | 1.11E-16       | 1.78E-15 | FGB; HLA-H; ANXA1; S100A1; FGG; HLA-B; HLA-C; MSN; TAP1; HLA-A; A1BG; COL1A1; C3; COL3A1; COL1A2; MYO1C; CA2; HLA-DRA; MYH9; ACAA1; B2M; HLA-DRB1 |

**Supplementary Table 6.** Subject characteristics for immunofluorescence protein localization

| Subjects | Age | Sex | Current diagnosis | Autoantibodies                           | Muscle biopsied | Notes                              | Treatment at biopsy            |
|----------|-----|-----|-------------------|------------------------------------------|-----------------|------------------------------------|--------------------------------|
| sIBM     | 52  | M   | sIBM              | Anti-NT5c1A                              | Quadriceps      |                                    | None                           |
| sIBM     | 61  | M   |                   | None                                     | Triceps         |                                    | None                           |
| sIBM     | 69  | M   |                   | None                                     | Biceps brachii  |                                    | IVIg                           |
| sIBM     | 68  | M   |                   | Anti-NT5c1A                              | Quadriceps      |                                    | None                           |
| DM       | 18  | F   | DM                | Anti-TIF1g                               | Deltoid         |                                    | None                           |
| DM       | 50  | F   |                   | Anti-Mi2                                 | Deltoid         |                                    | None                           |
| DM       | 42  | M   |                   | Anti-Mi2                                 | Deltoid         | Polyarthritis, ILD                 | MMF                            |
| PM       | 70  | M   | PM                | None                                     | Deltoid         | Severe respiratory muscle weakness | Prednisone 50mg/day, IVIg      |
| OM       | 79  | F   | OM                | Anti-sm, anti-dsDNA, anti-RNP, anti-Ro52 | Deltoid         | Sicca, Raynaud, calcinosis         | Prednisone 10mg/day, IVIg, MMF |

Abbreviations: sIBM, sporadic inclusion body myositis; DM, dermatomyositis; PM, polymyositis; OM, overlap myositis; ILD, interstitial lung disease; IVIg, intravenous immunoglobulins; MMF, mycophenolate mofetil.
